# Supplementary material
Source: PubMed Central journal article supplement (PMC6283408)
Supplement: NIHMS965131-supplement-Supplementary_Information.pdf [file NIHMS965131-supplement-Supplementary_Information.pdf]

## Supporting Information

### Small molecule inhibitors of metabolic enzymes repurposed as a new class of anthelmintics

Rahul Tyagi<sup>1#</sup>, Amarendar Reddy Maddirala<sup>2#</sup>, Mostafa Elfawal<sup>3#</sup>, Chelsea Fischer<sup>4</sup>, Bruce A. Rosa<sup>1</sup>, Xin Gao<sup>1</sup>, Ryan Chugani<sup>2</sup>, Mingzhou Zhou<sup>2</sup>, Jon Helander<sup>2</sup>, Paul Brindley<sup>6</sup>, Chih-Chung Tseng<sup>7</sup>, Iain R. Greig<sup>7</sup>, Judy Sakanari<sup>4</sup>, Scott A. Wildman<sup>5</sup>, Raffi Aroian<sup>3\*</sup>, James W. Janetka<sup>2\*</sup> and Makedonka Mitreva<sup>1,8\*</sup>

### Table of Content

| Details                                                                                                                                                                                                                                                                                                                                                             | Page number    |
|---------------------------------------------------------------------------------------------------------------------------------------------------------------------------------------------------------------------------------------------------------------------------------------------------------------------------------------------------------------------|----------------|
| Figures S1-S26: 1H-NMR & LCMS spectral data for compounds <b>6(a-o)</b> , <b>10(a-b)</b> , <b>17(a-b)</b> , <b>23(a-c)</b> & <b>24(a-c)</b>                                                                                                                                                                                                                         | <b>S2-S27</b>  |
| Figure S27: Time- and species- dependence of the IC <sub>50</sub> values. A) <i>Brugia pahangi</i> IC <sub>50</sub> values for seven compounds over three days of exposure; B) <i>Trichuris muris</i> and <i>B. pahangi</i> IC <sub>50</sub> values for five compounds at day 2.                                                                                    | <b>S28</b>     |
| Figures S28-S44: Bioaccumulation analysis figures                                                                                                                                                                                                                                                                                                                   | <b>S29-S56</b> |
| Figure S45. RNAseq based gene expression profile in different tissues of adult intestinal nematode <i>Ascaris suum</i> shows increased expression of CPT1/2 in ovary compared to the uterus in female worms and the seminal vesicle and testis in male worms. Gene expression values used are from our earlier report, Rosa et al, 2014.(Rosa, Jasmer et al. 2014). | <b>S57</b>     |

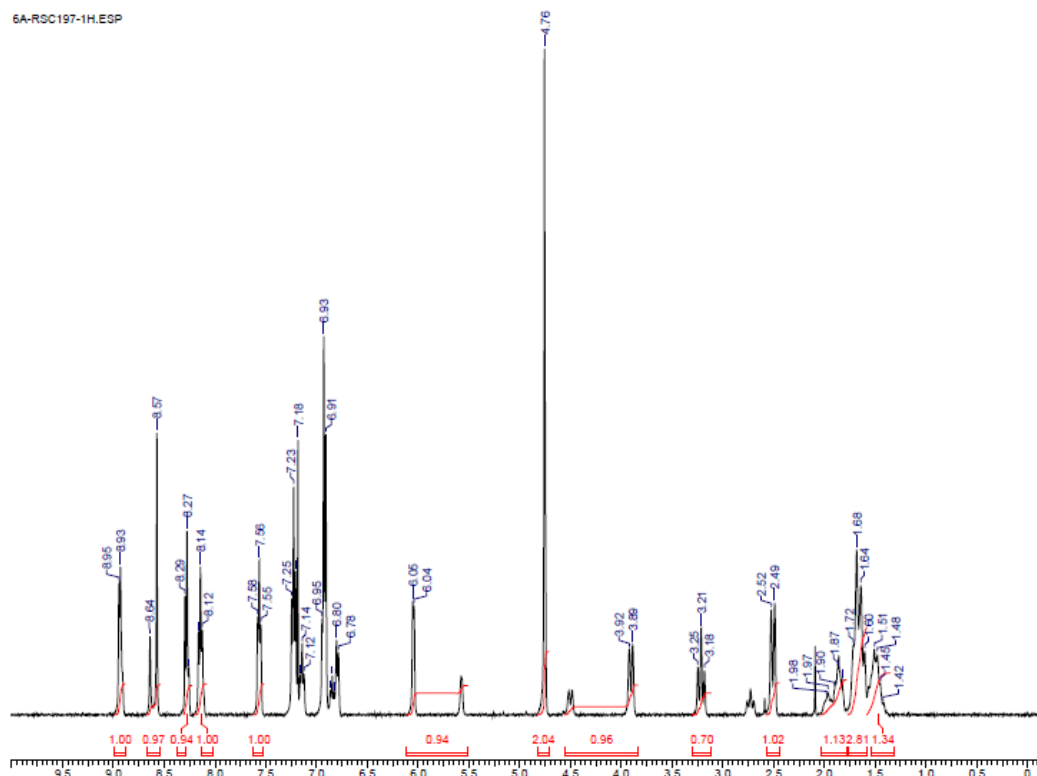

### LCMS of compound 6a

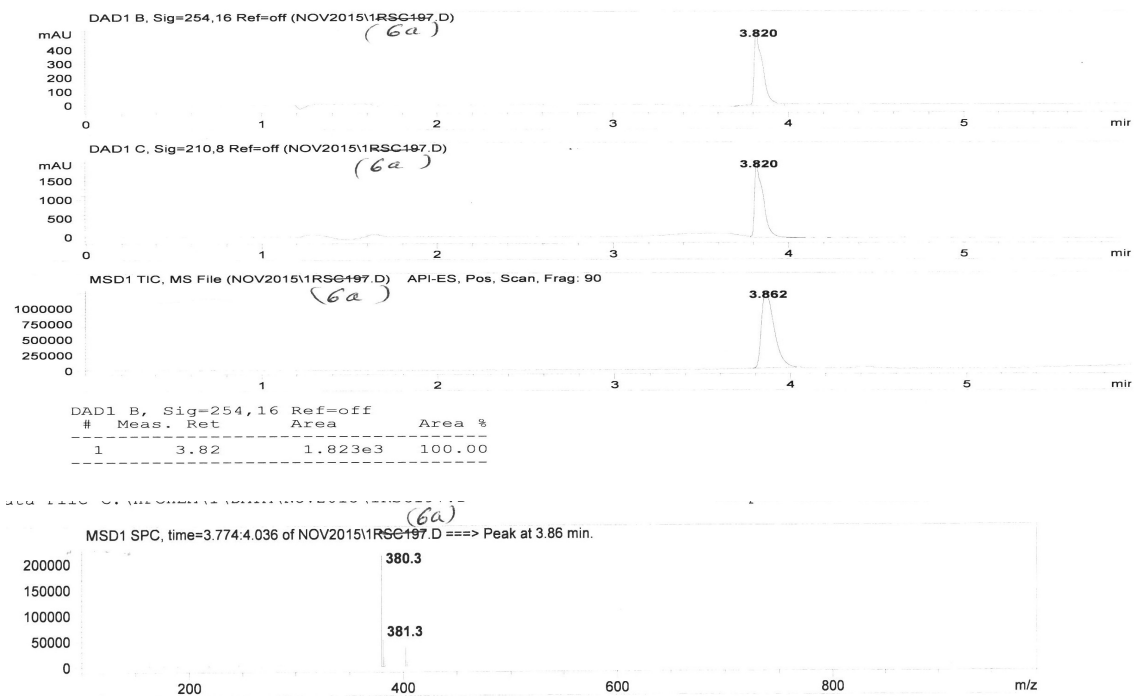

Figure S1:  $^1\text{H}$  NMR of compound 6a

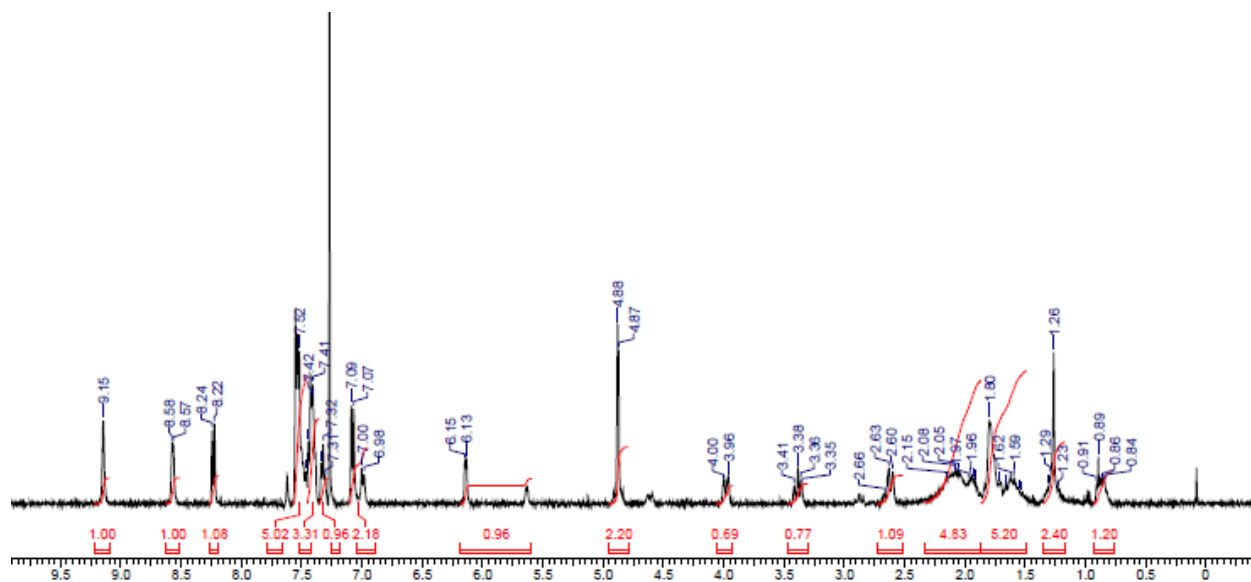

### LCMS of compound **6b**

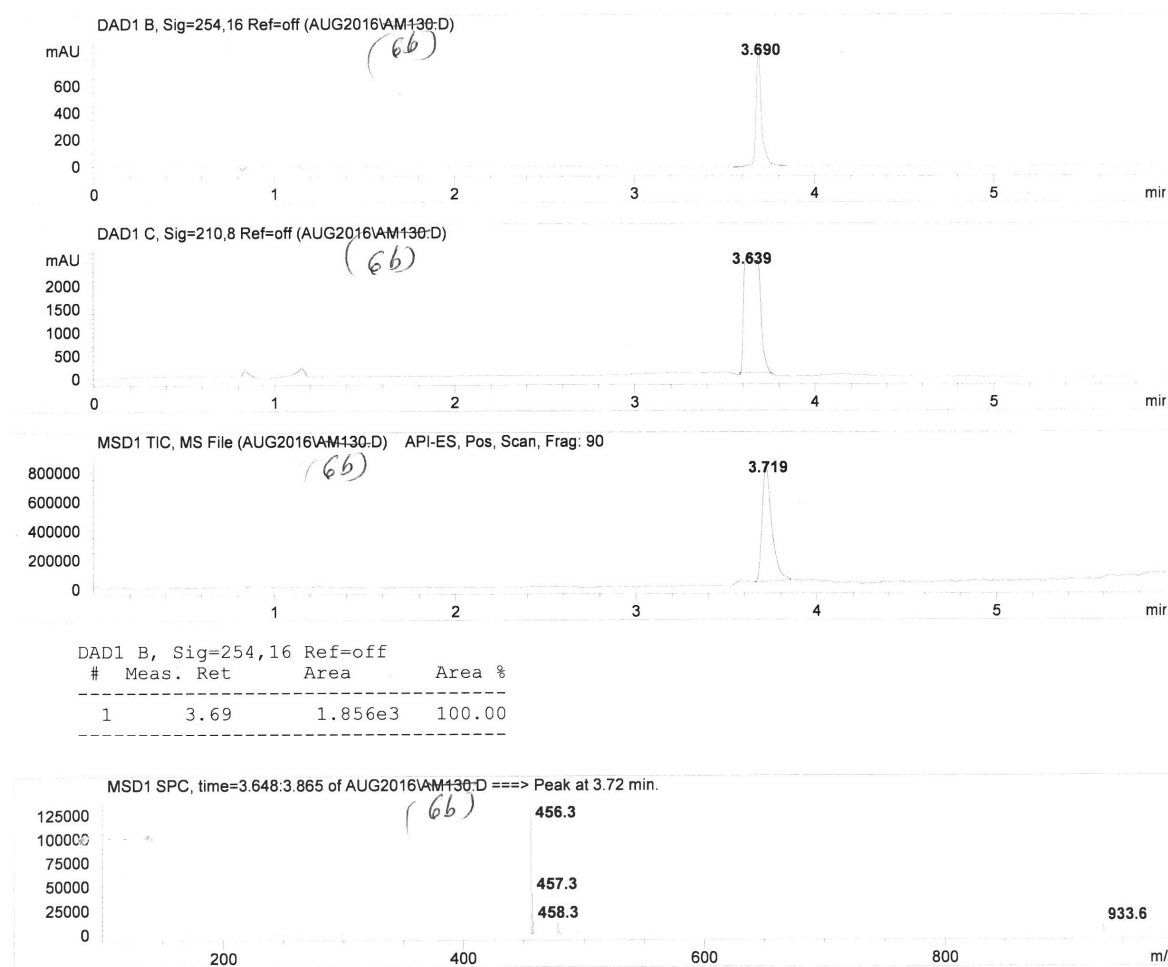

Figure S2:  $^1\text{H}$  NMR of compound **6b**

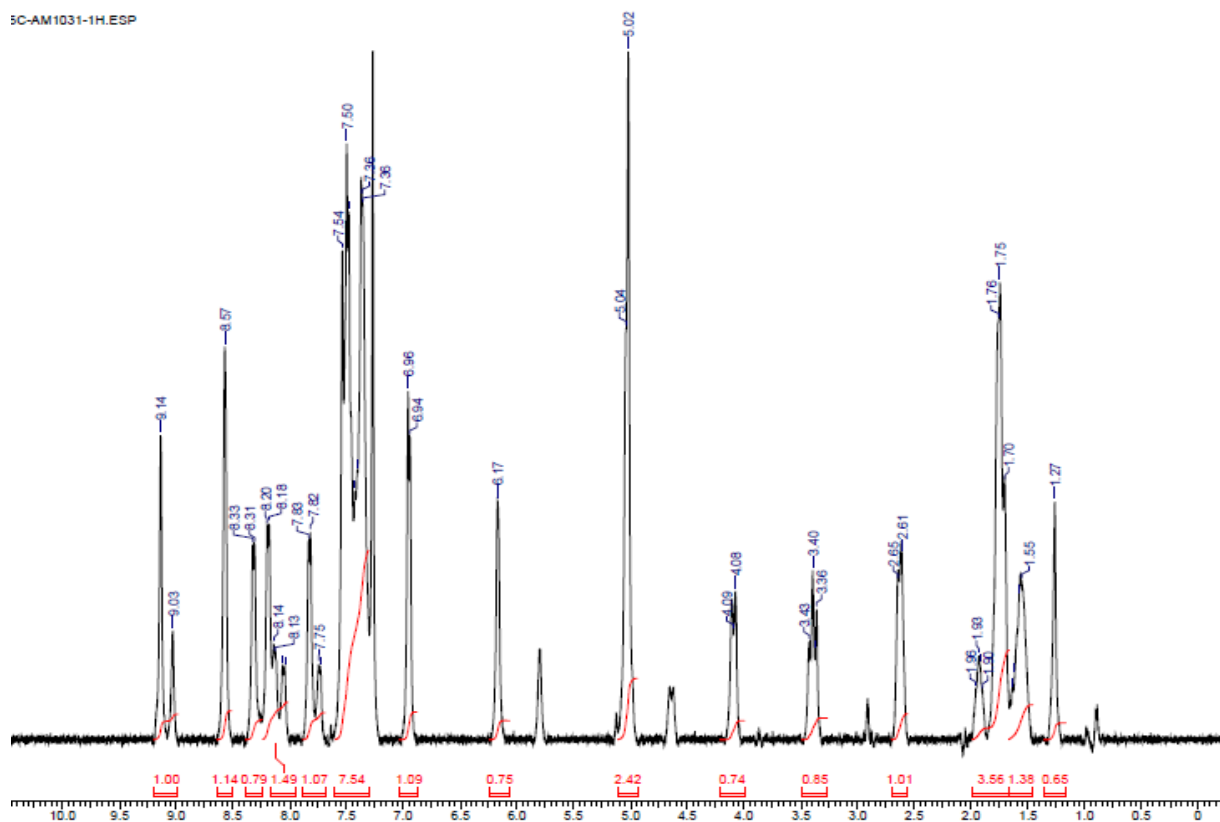

## LCMS of compound 6c

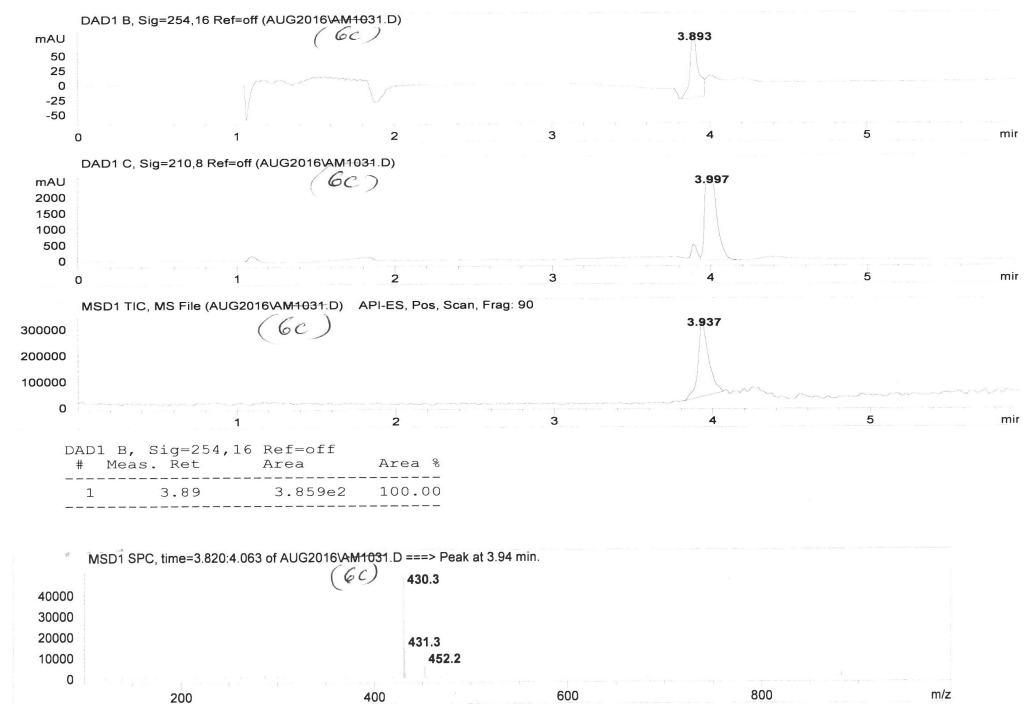Figure S3:  $^1\text{H}$  NMR of compound 6c



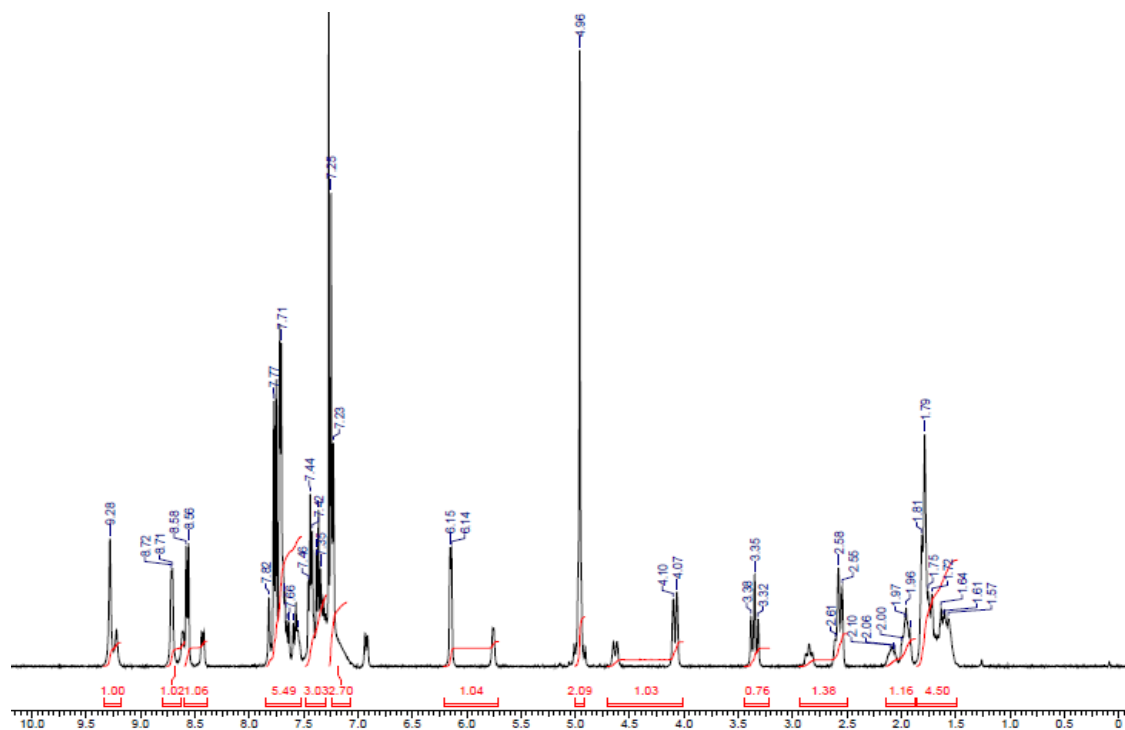

LCMS of compound **6d**

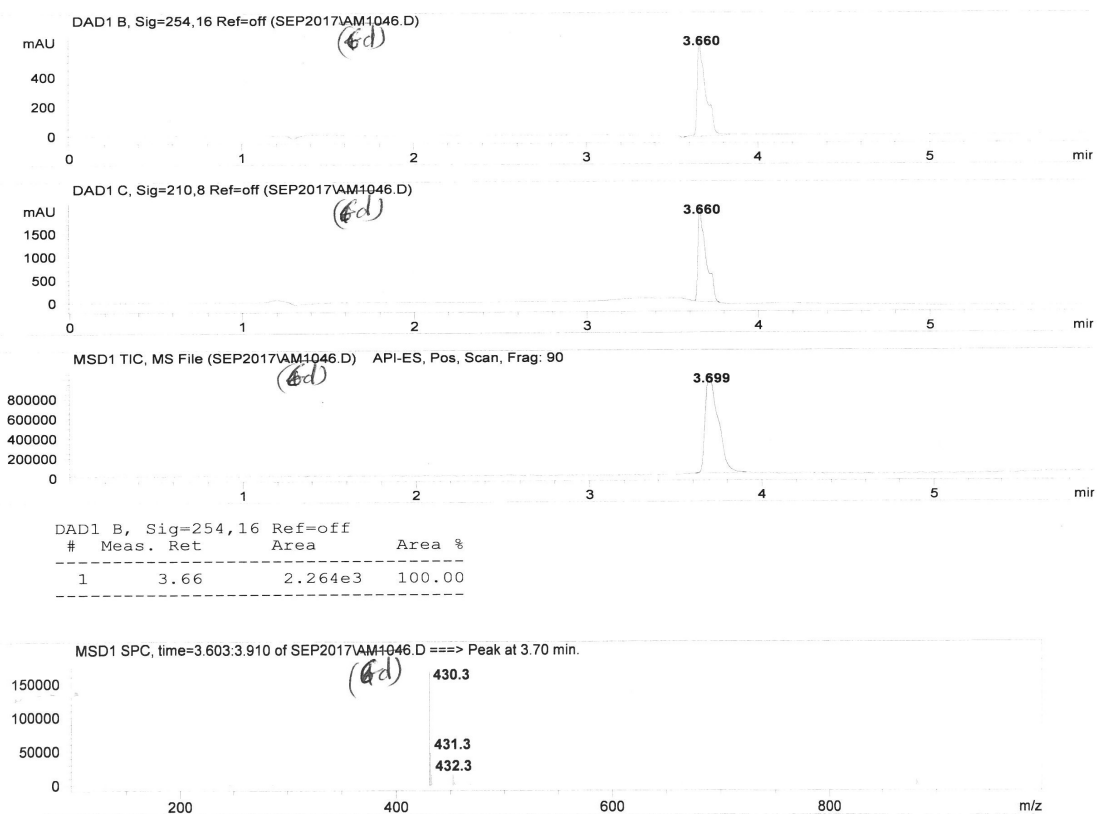

Figure S4:  $^1\text{H}$  NMR of compound **6d**

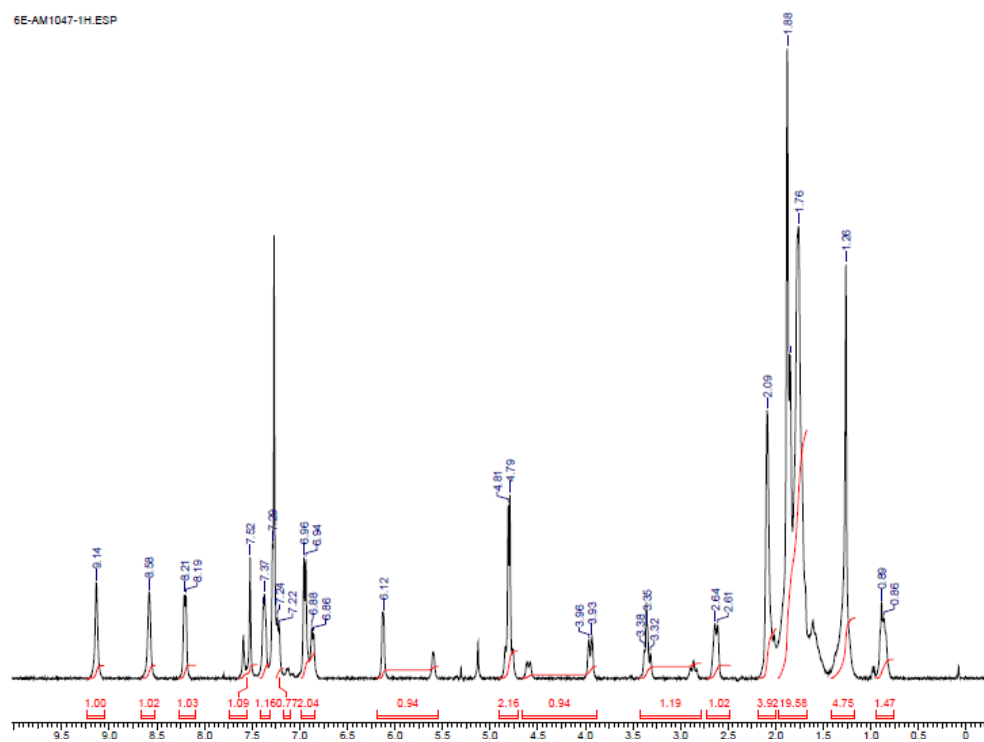

### LCMS of compound 6e

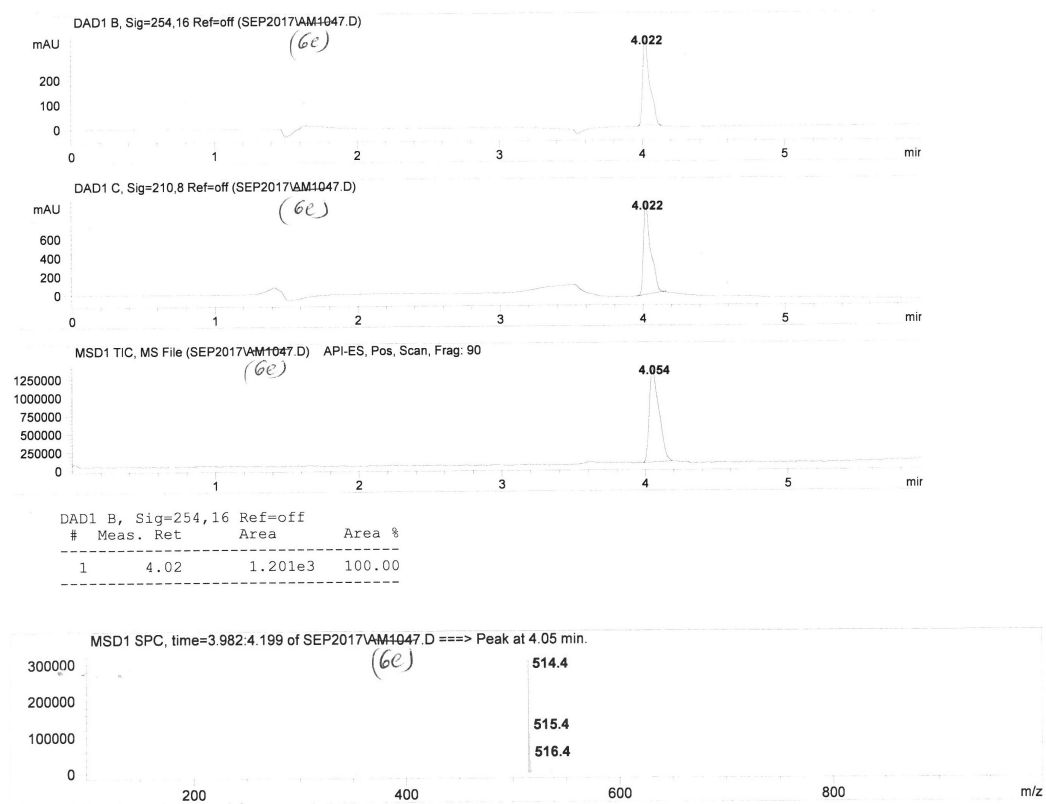

Figure S5: <sup>1</sup>H NMR of compound 6e

6F-RSC198-1H-ESP

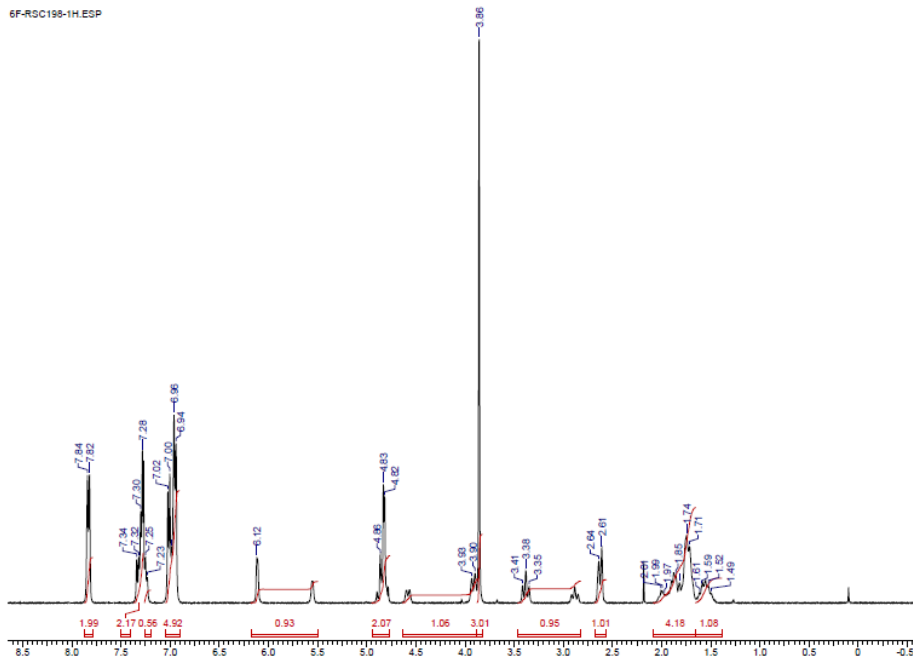

### LCMS of compound 6f

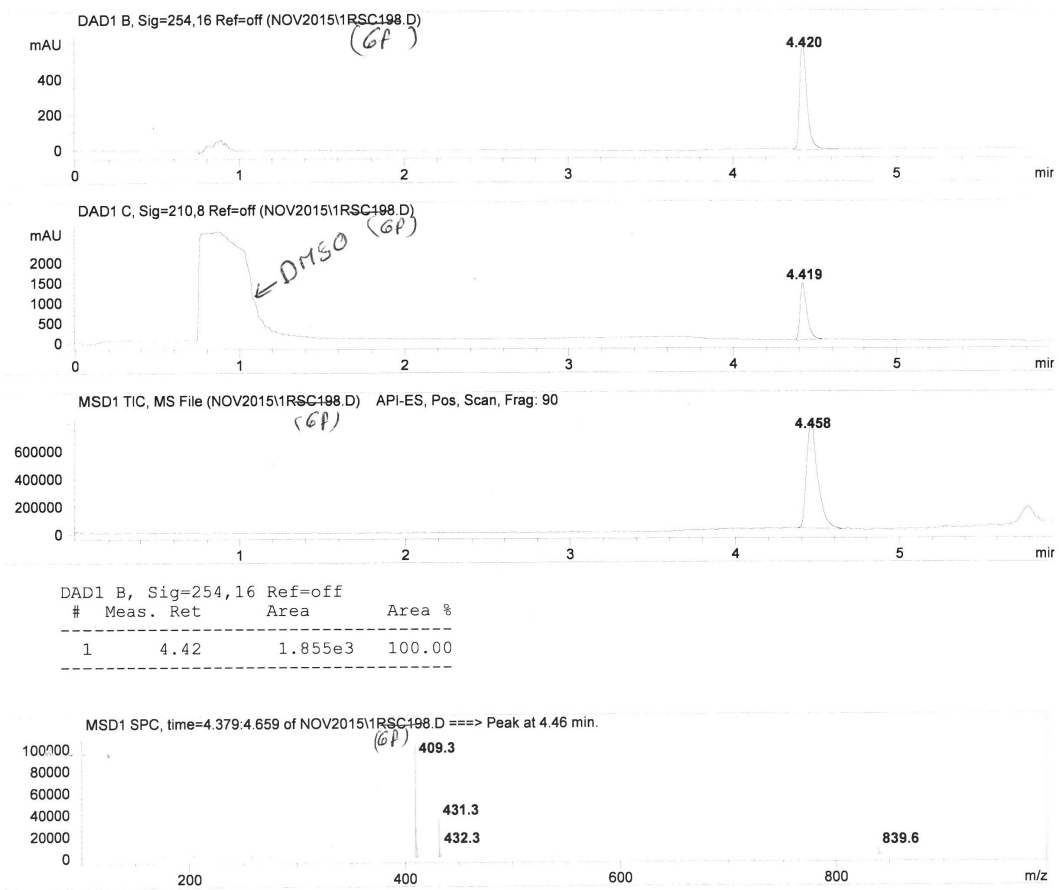

Figure S6: <sup>1</sup>H NMR of compound 6f

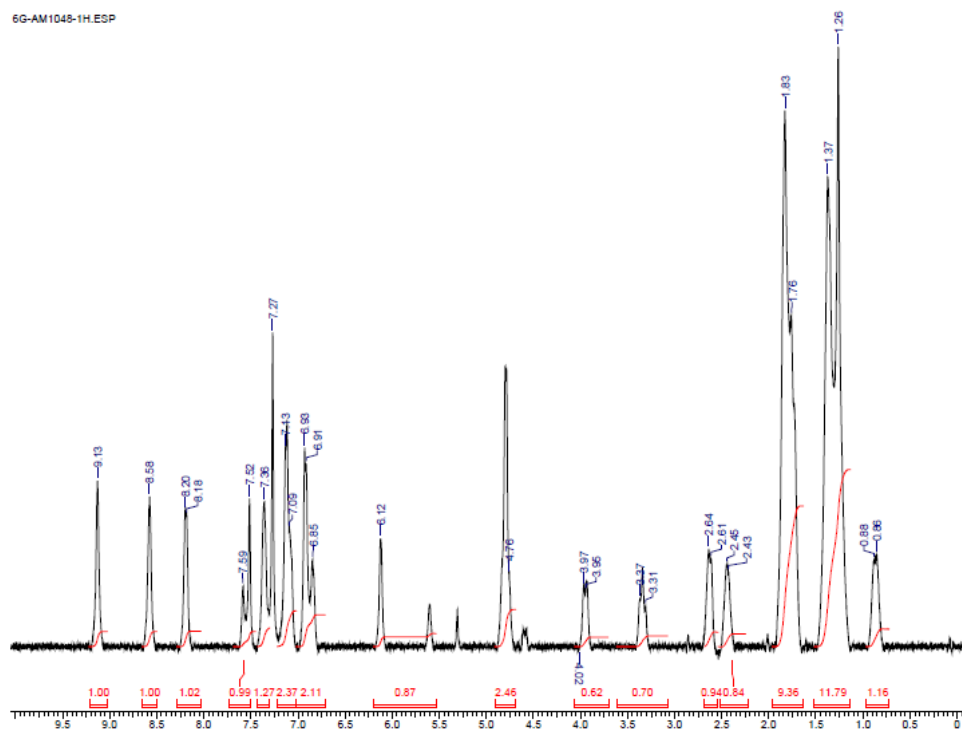

### LCMS of compound **6g**

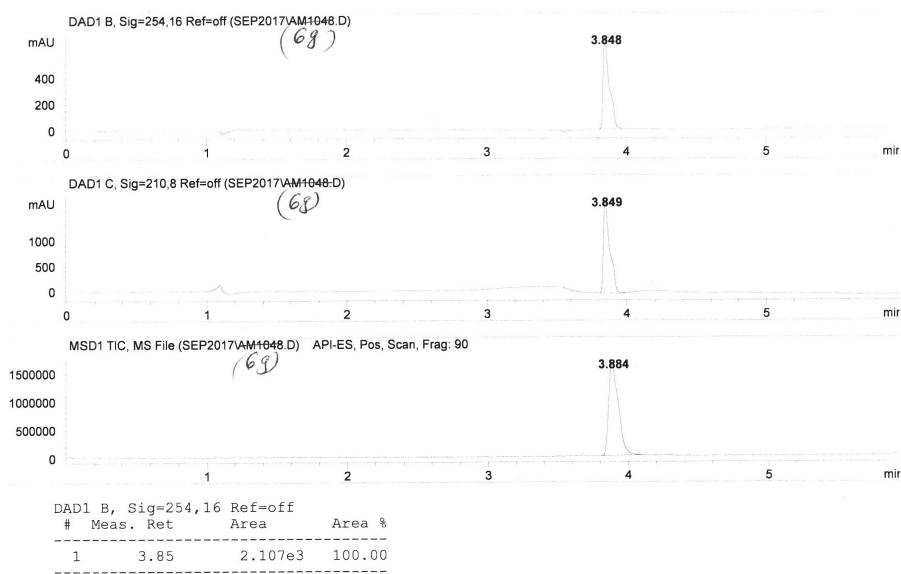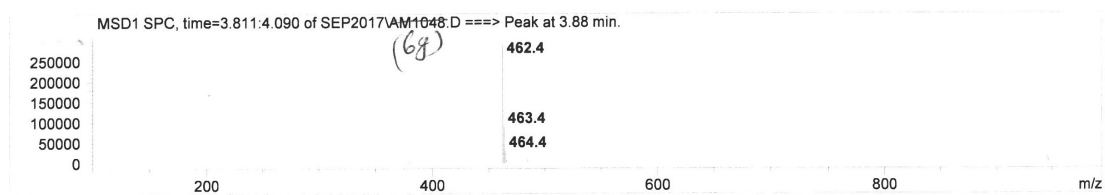

Figure S7:  $^1\text{H}$  NMR of compound **6g**

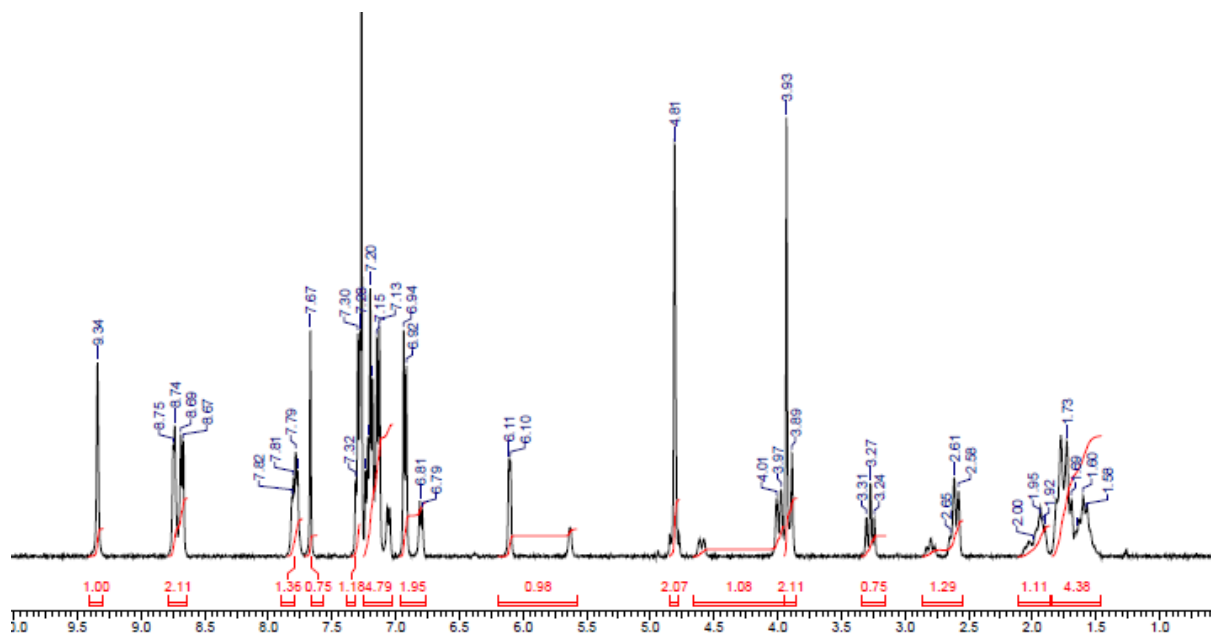

### LCMS of compound **6h**

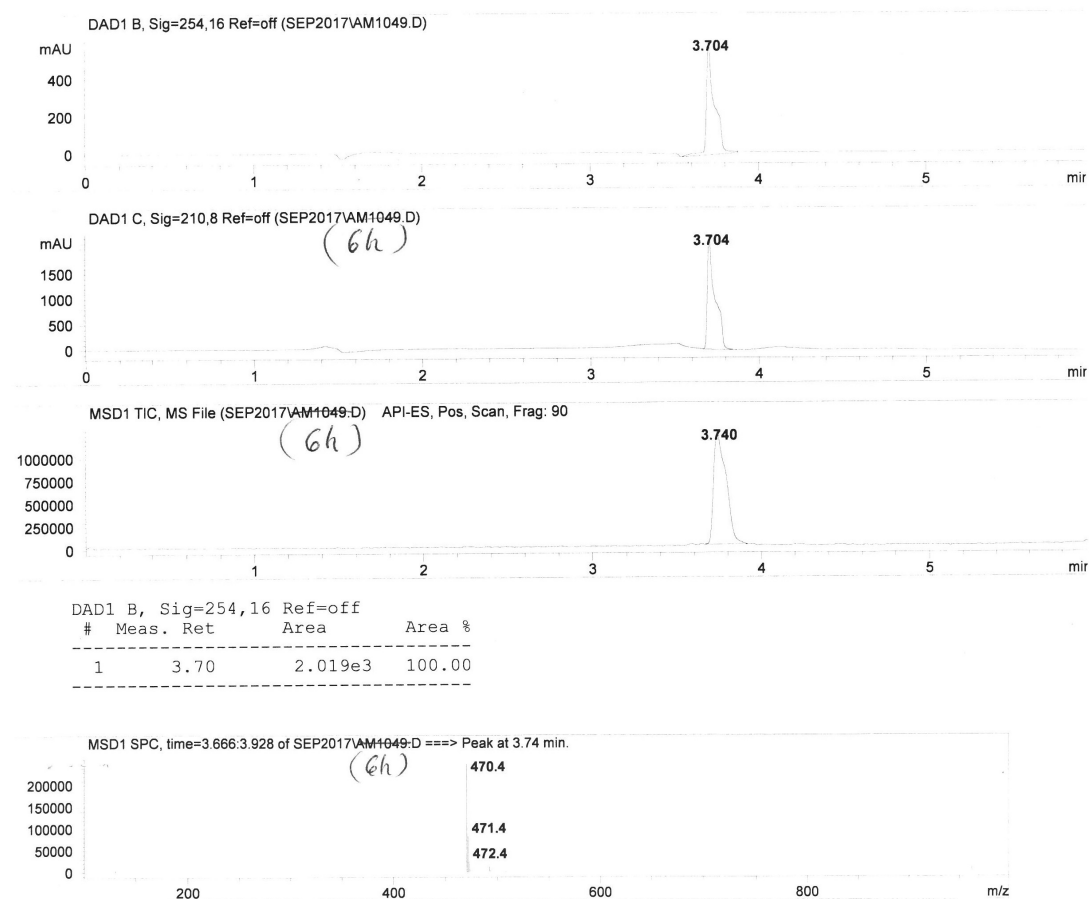

Figure S8:  $^1\text{H}$  NMR of compound **6h**

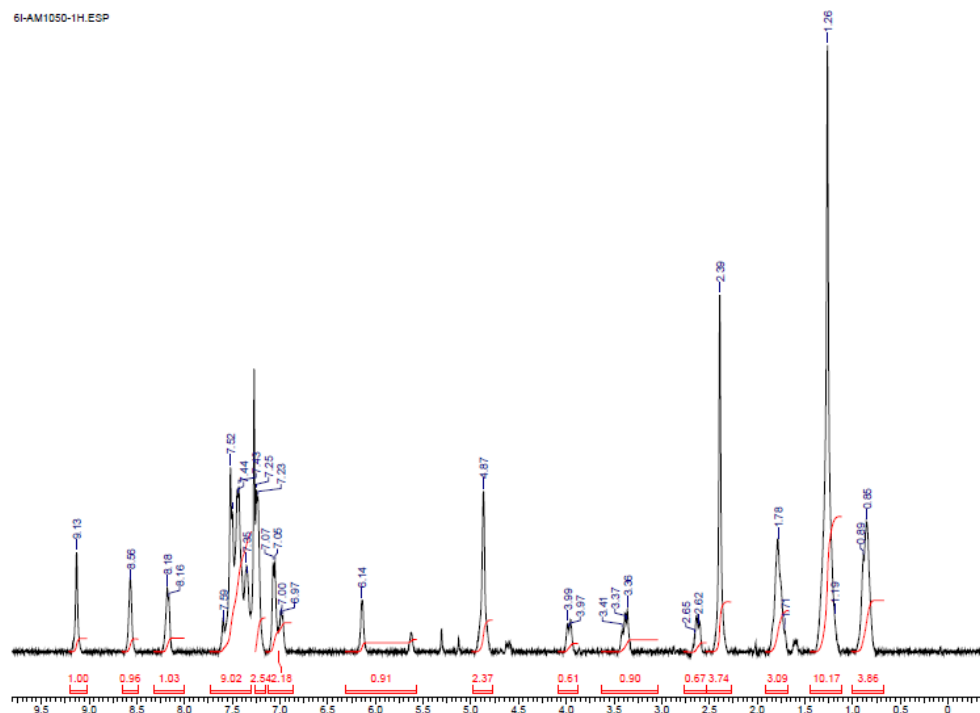

### LCMS of compound 6i

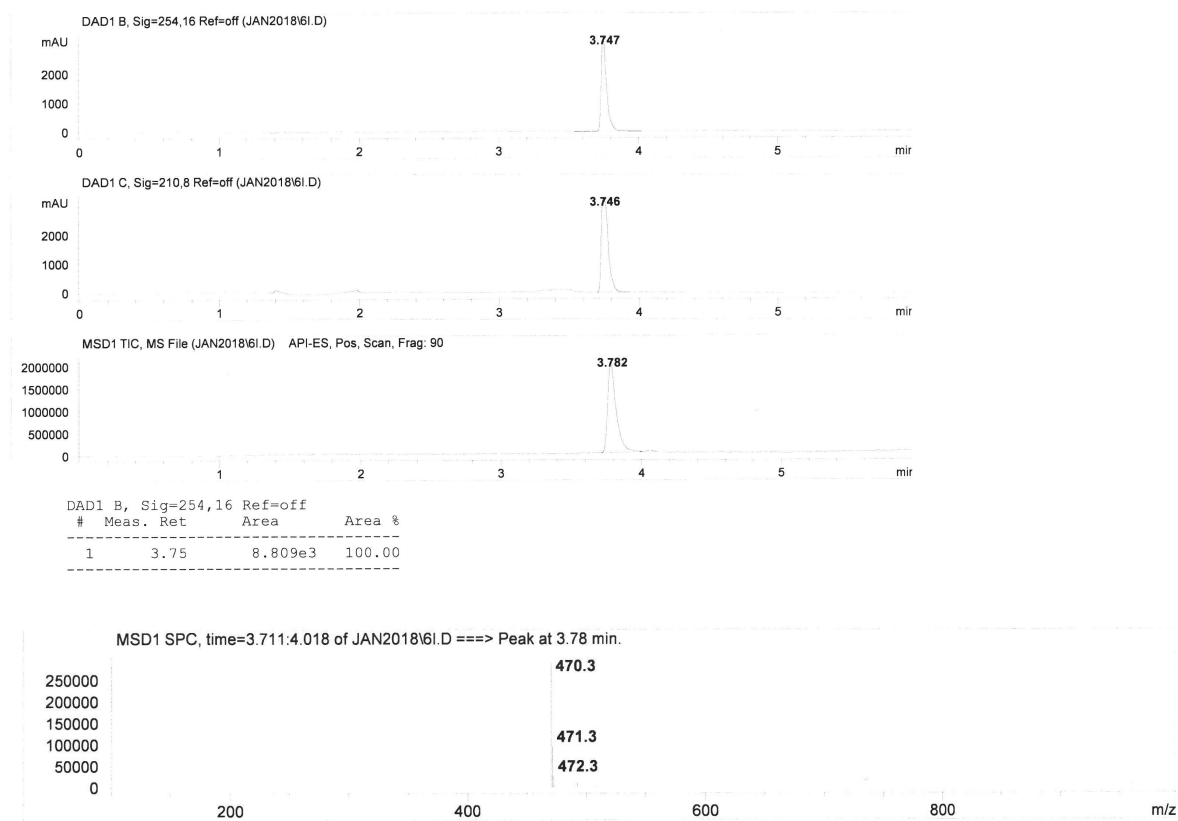

Figure S9:  $^1\text{H}$  NMR of compound 6i

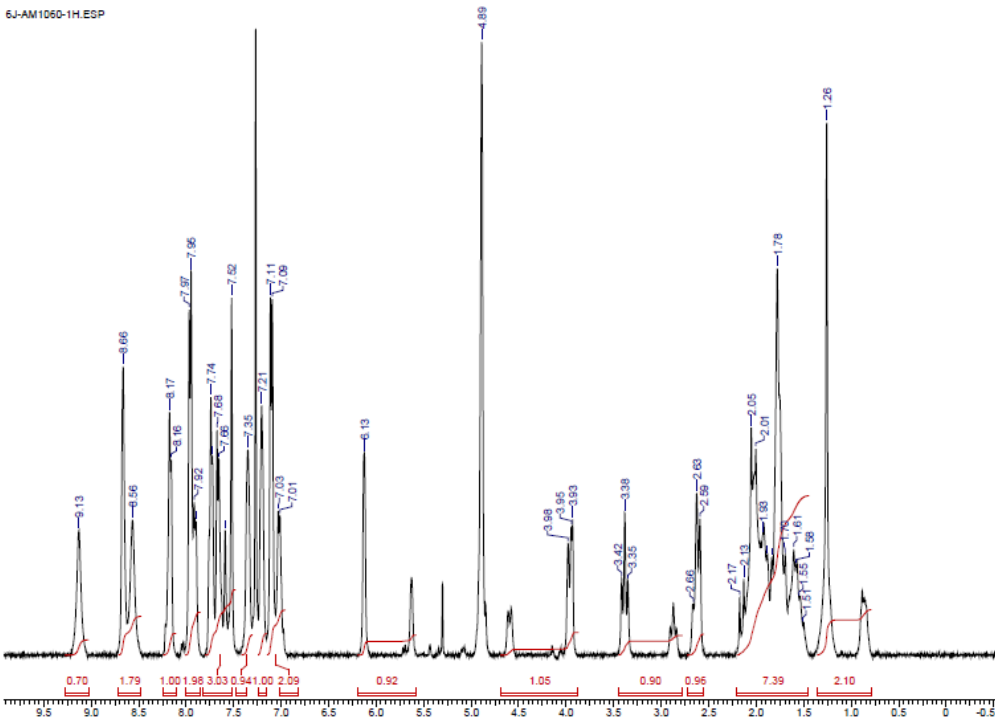

LCMS of compound 6j

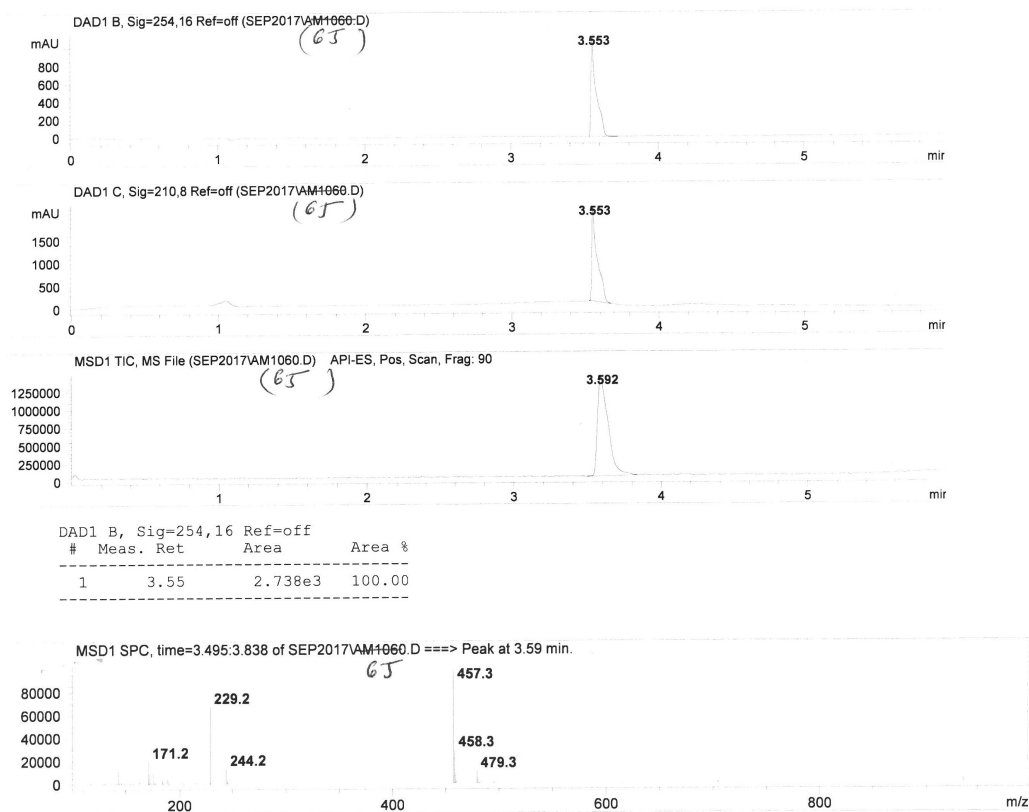

Figure S10: <sup>1</sup>H NMR of compound 6j

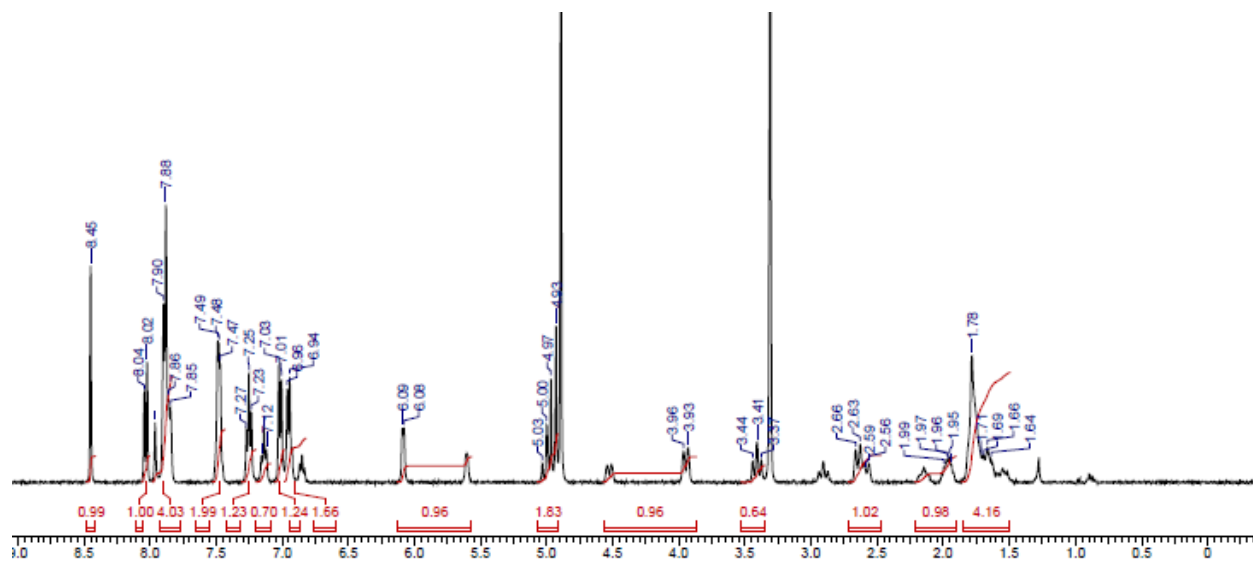

### LCMS of compound **6k**

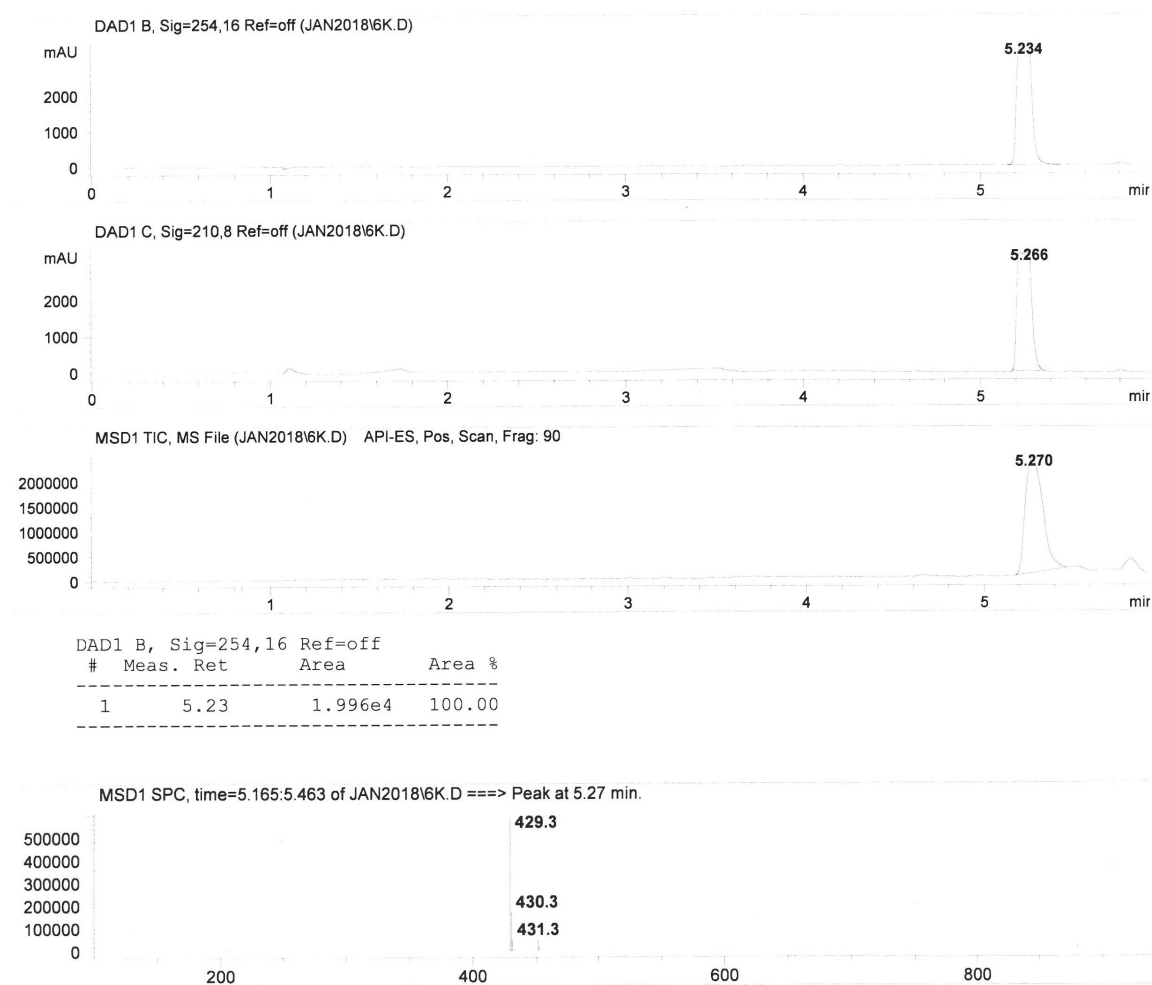

Figure S11:  $^1\text{H}$  NMR of compound **6k**



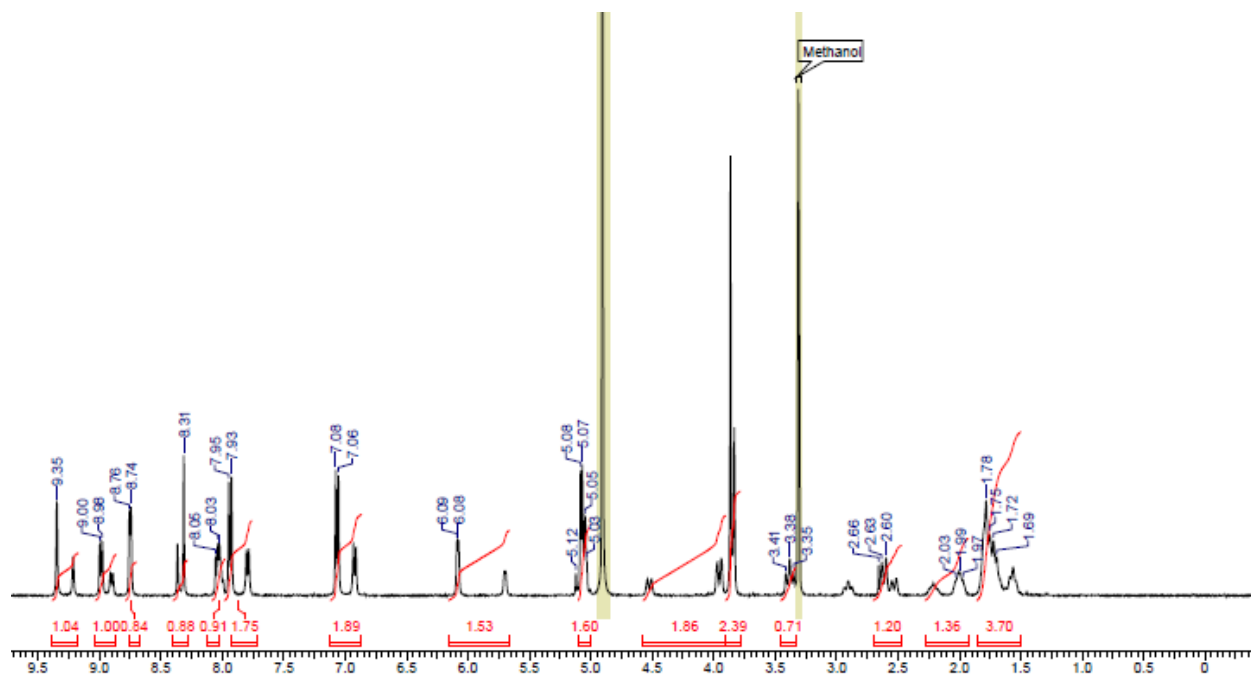

### LCMS of compound **6l**

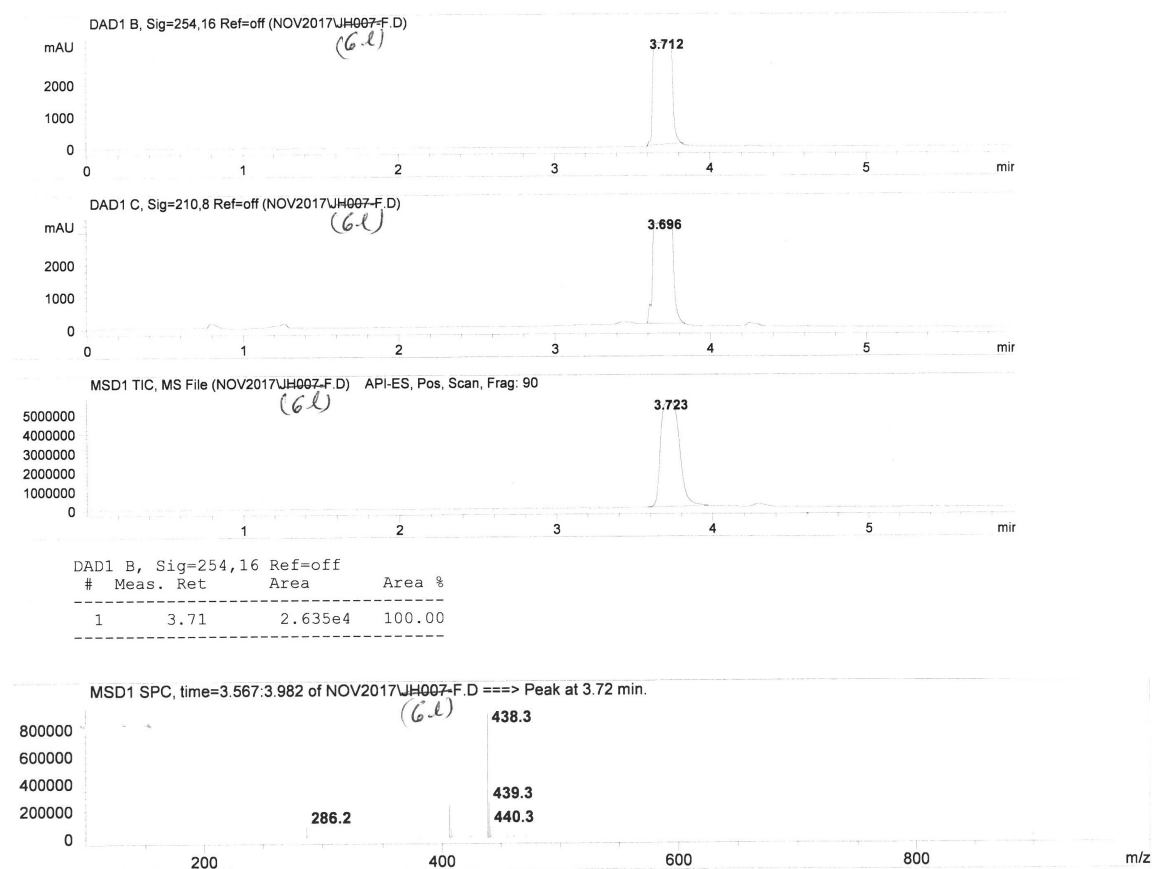

Figure S12:  $^1\text{H}$  NMR of compound **6l**

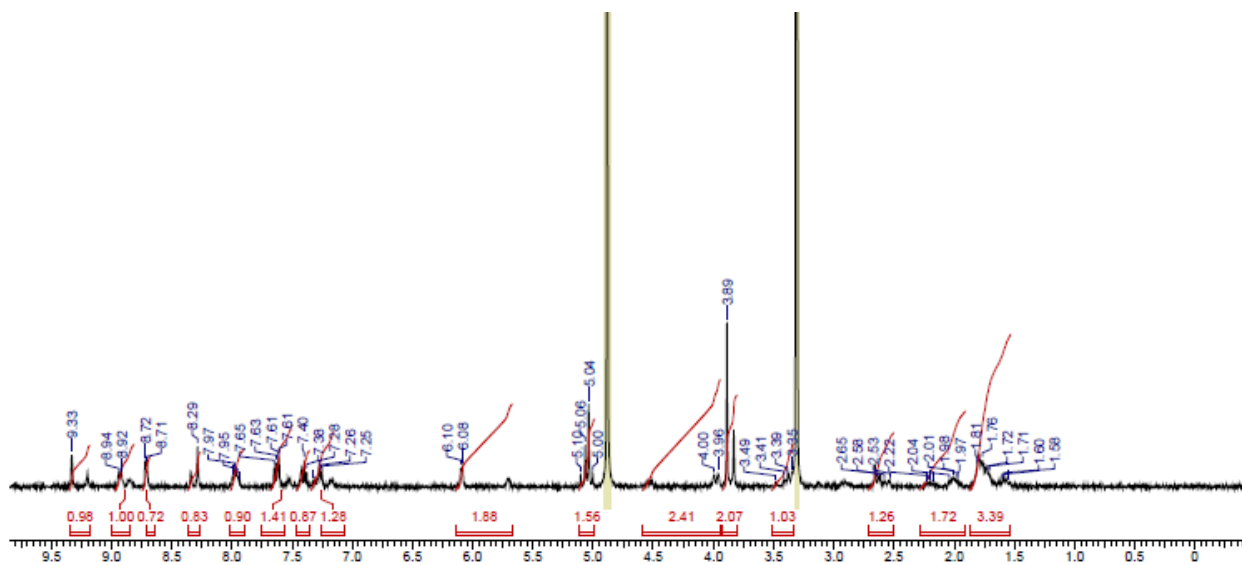

LCMS of compound **6m**

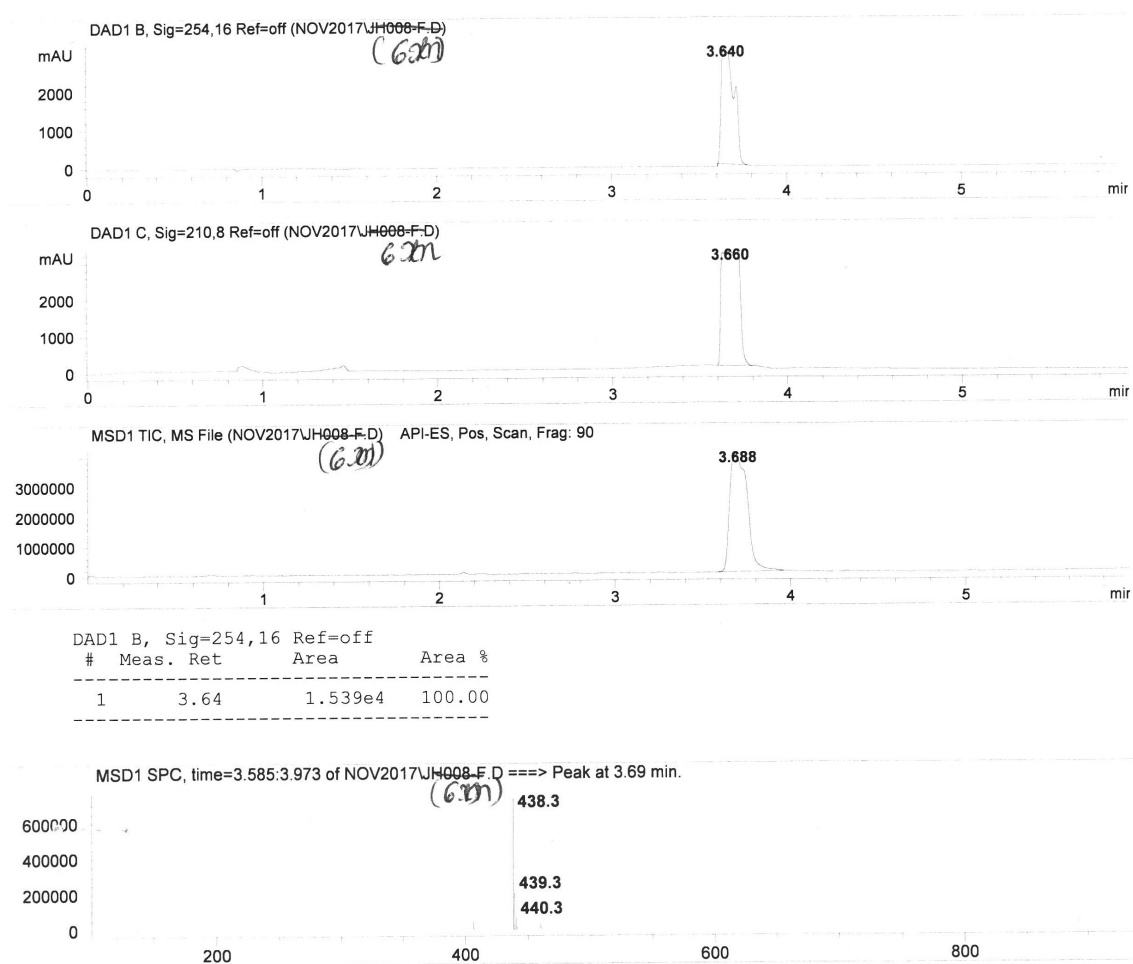

Figure S13:  $^1\text{H}$  NMR of compound **6m**

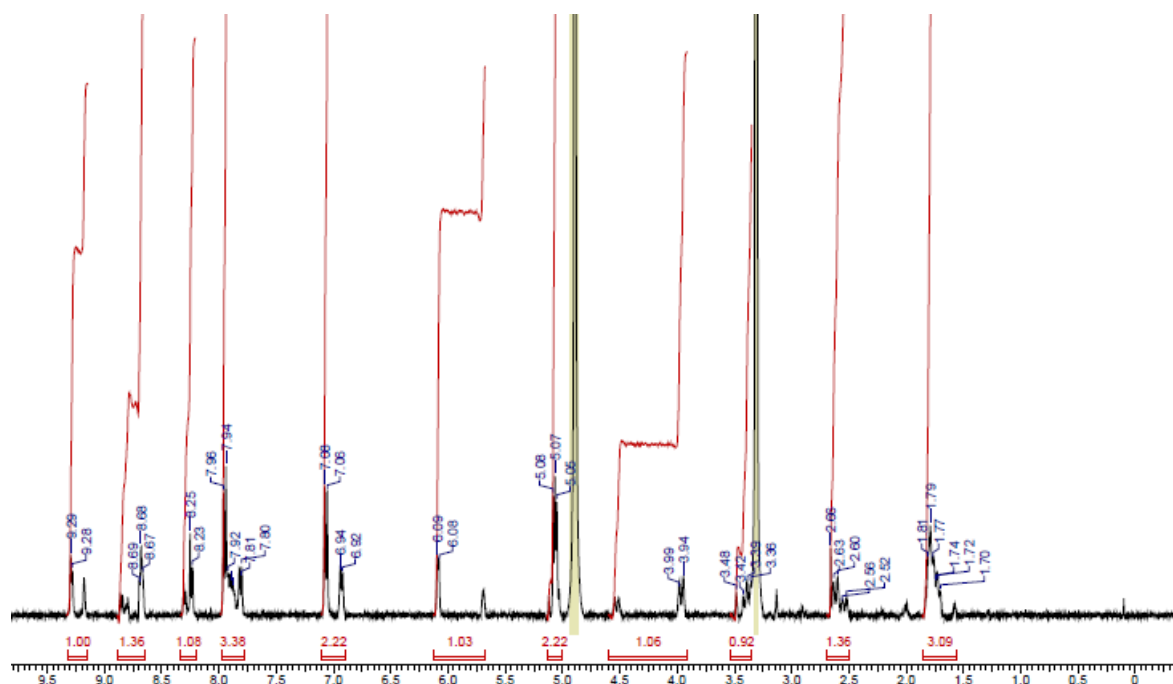

### LCMS of compound **6n**

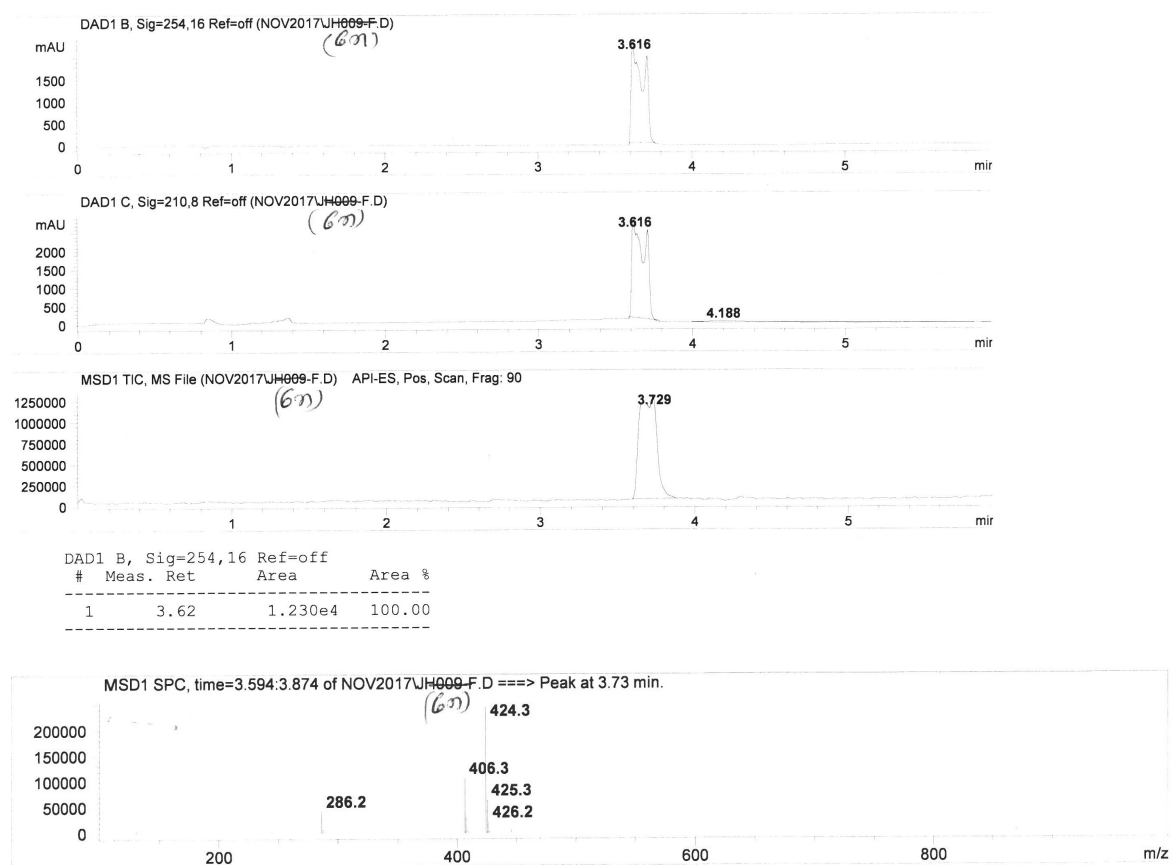

Figure S14:  $^1\text{H}$  NMR of compound **6n**

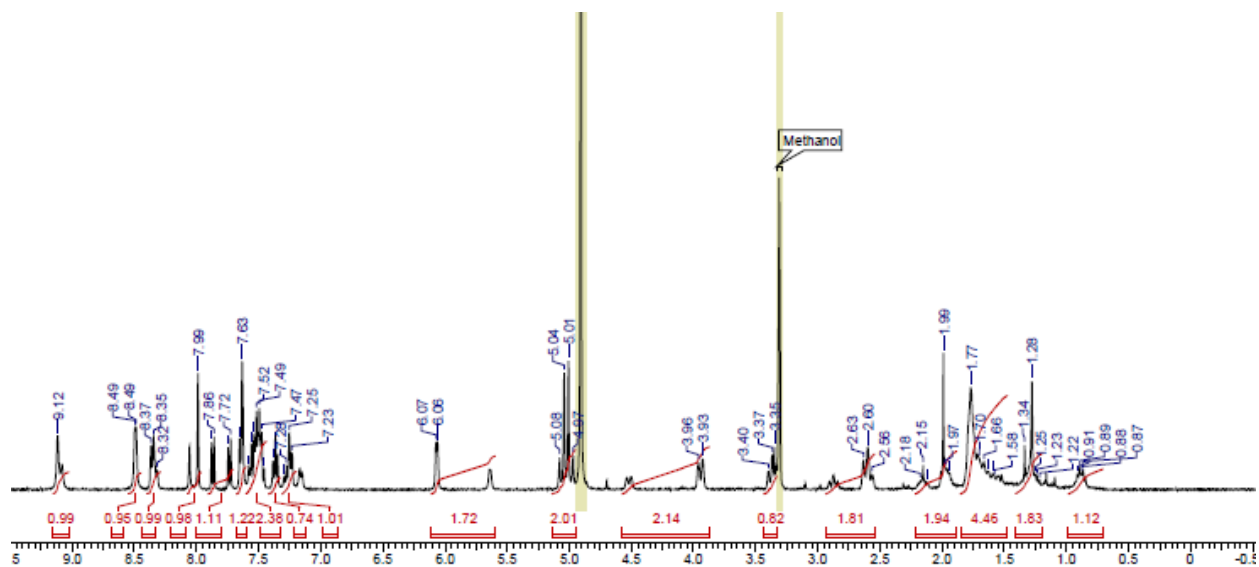

### LCMS of compound **60**

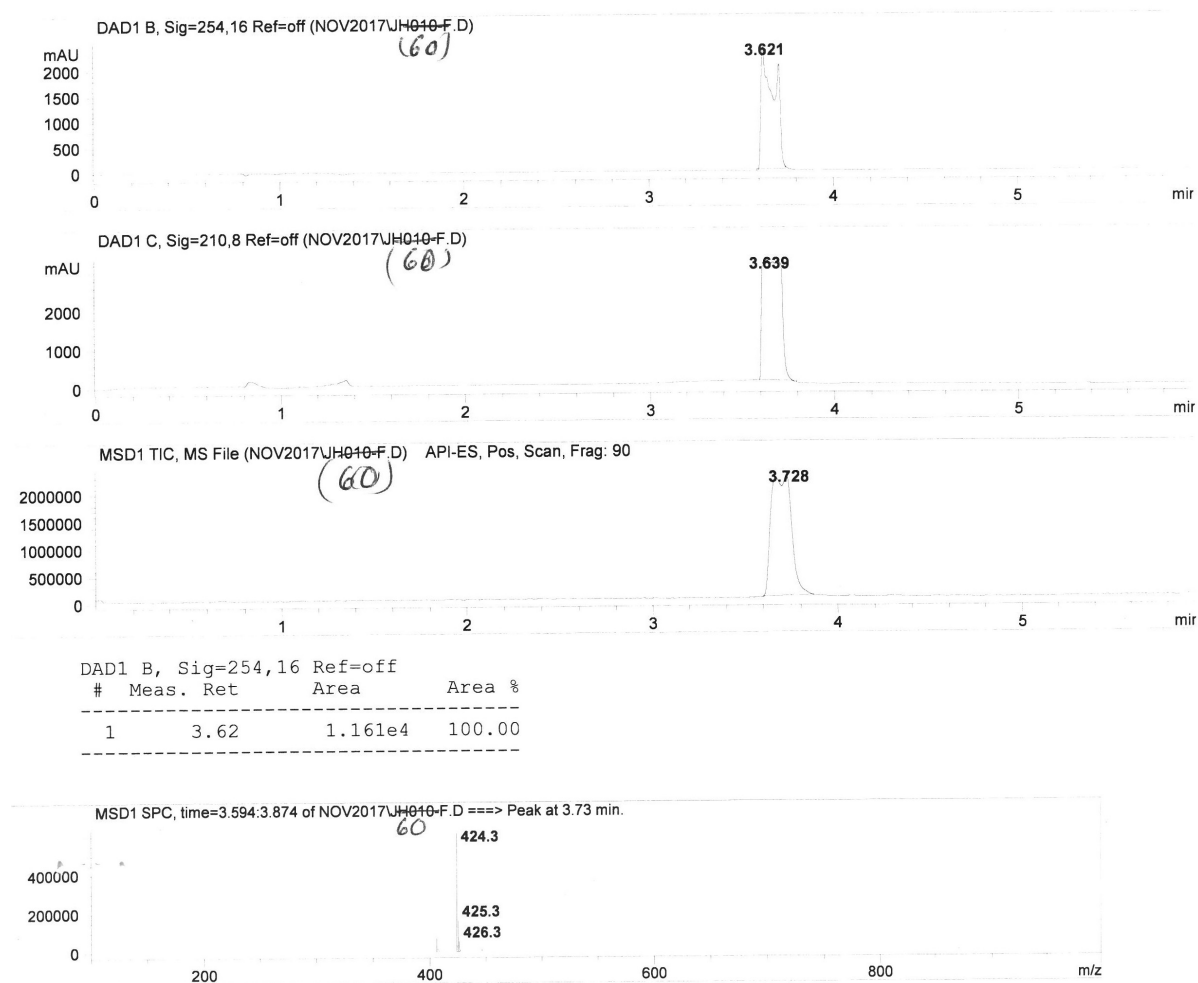

Figure S15:  $^1\text{H}$  NMR of compound **60**

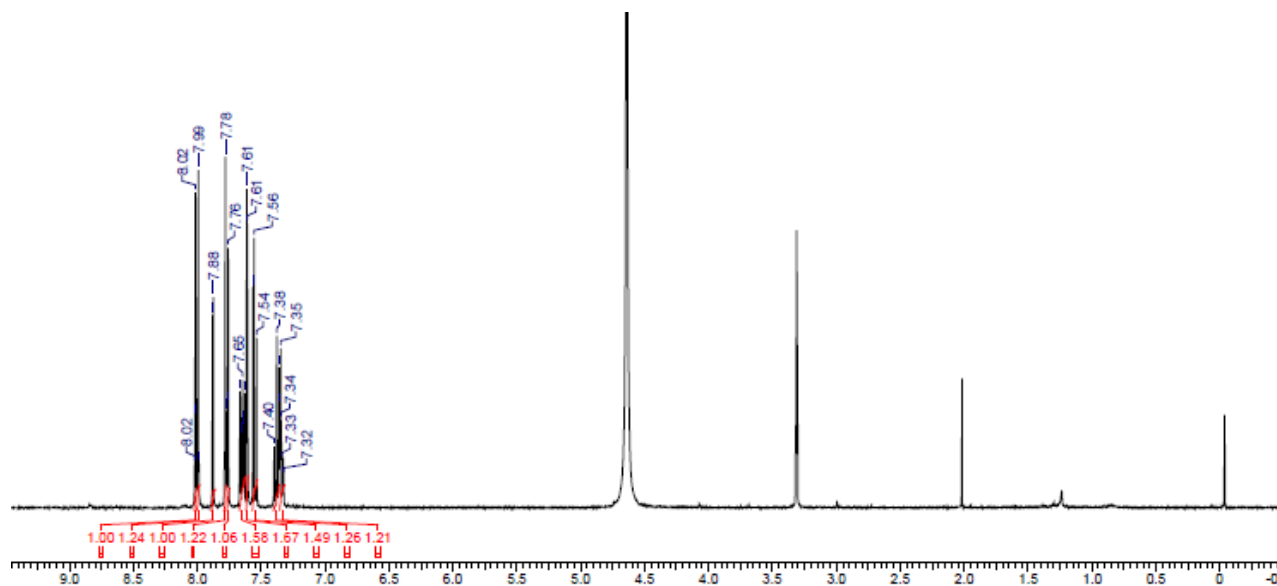

LCMS of compound 10a

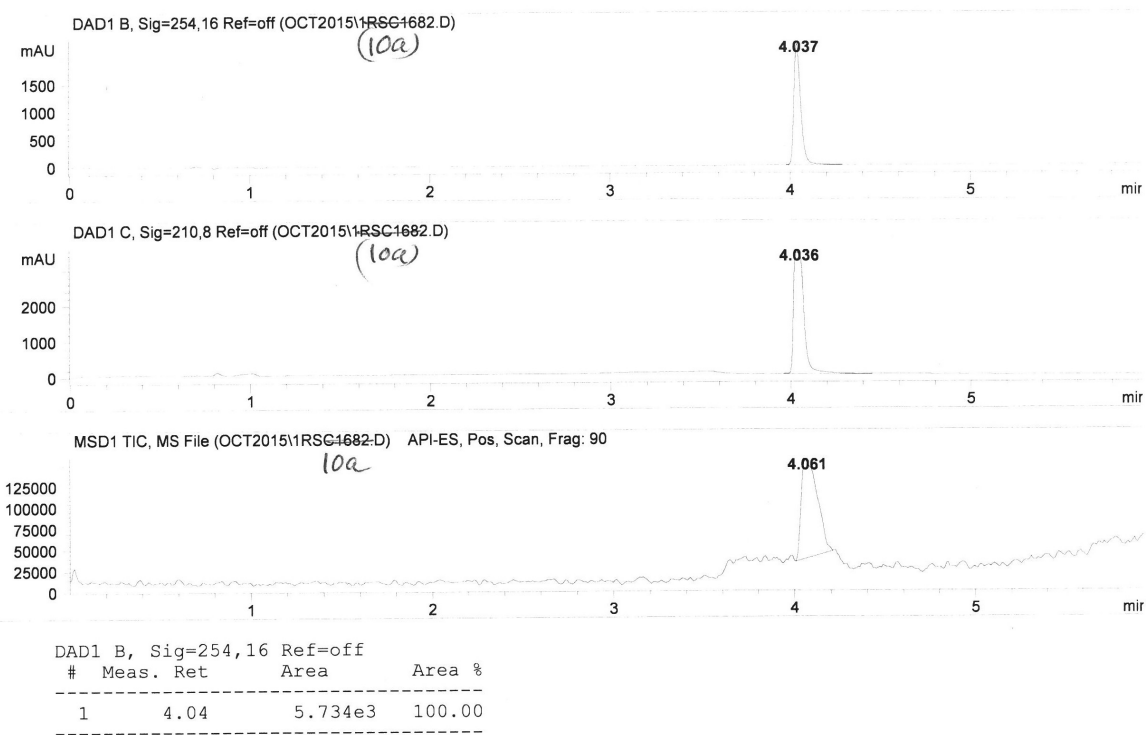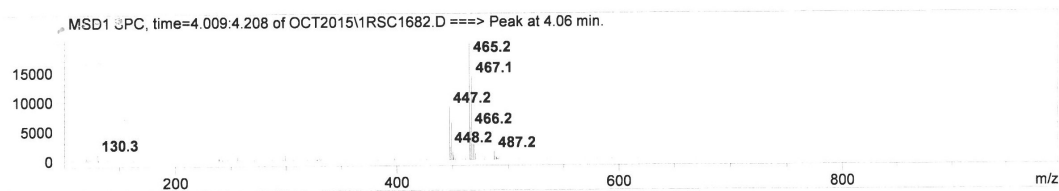

Figure S16:  $^1\text{H}$  NMR of compound 10a

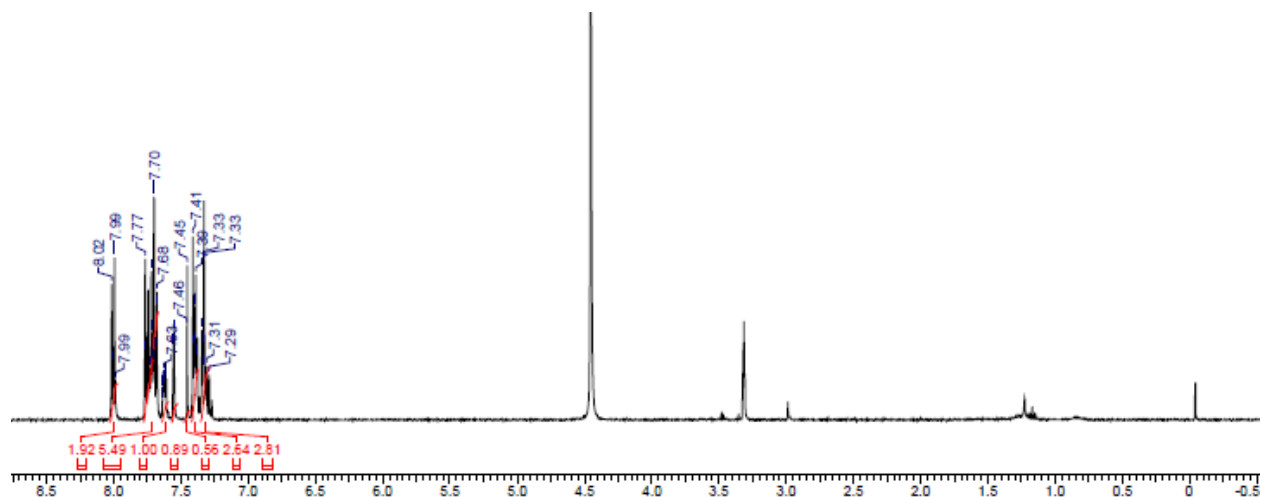

### LCMS of compound **10b**

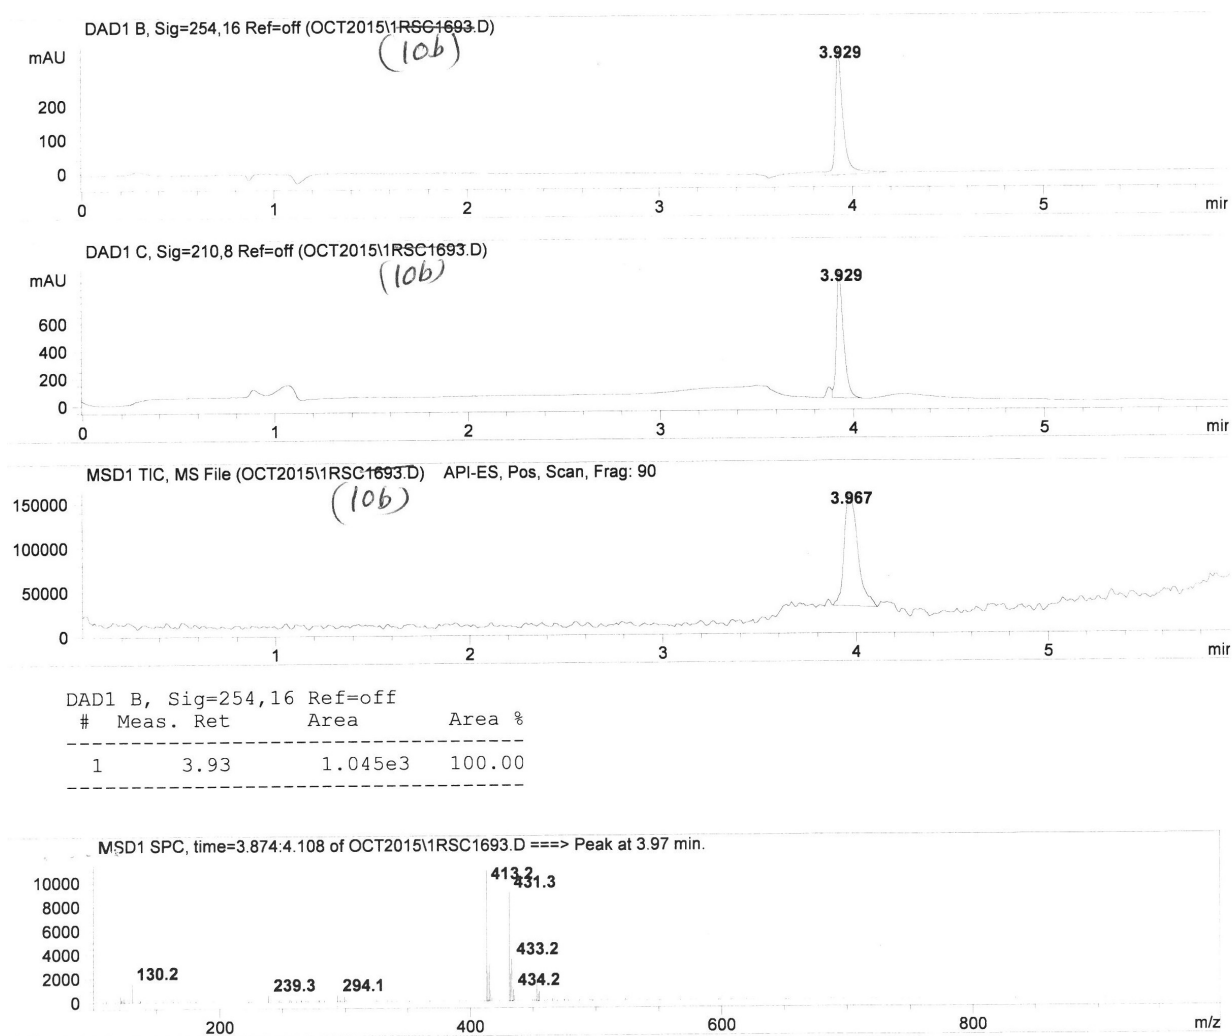

Figure S17:  $^1\text{H}$  NMR of compound **10b**

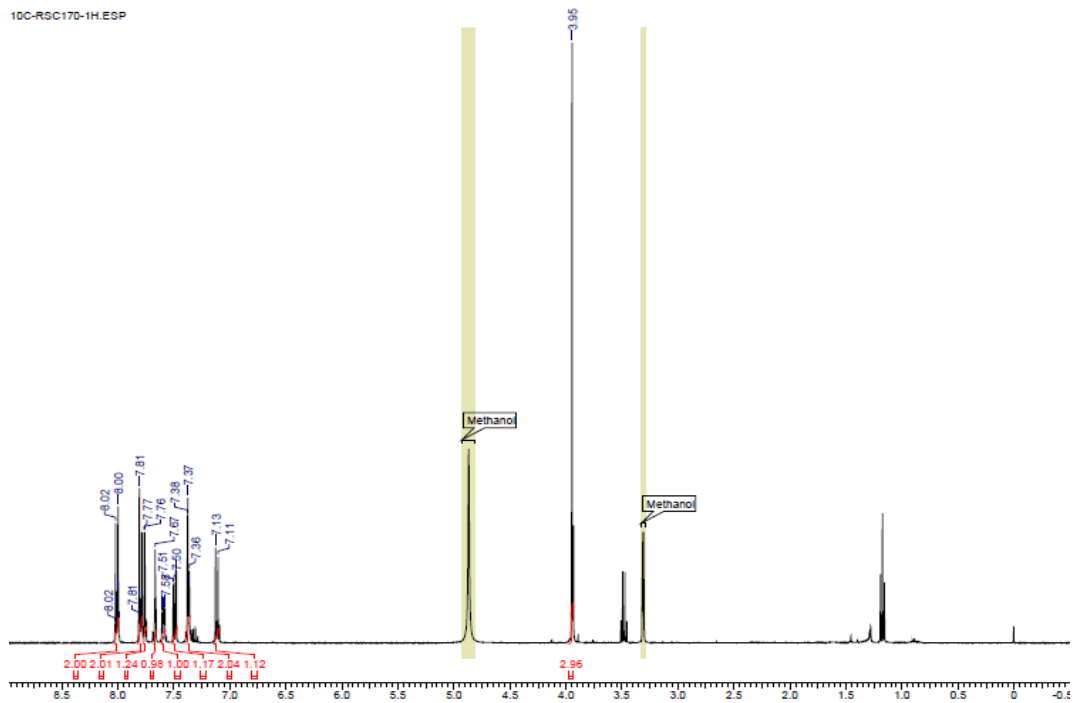

### LCMS of compound 10c

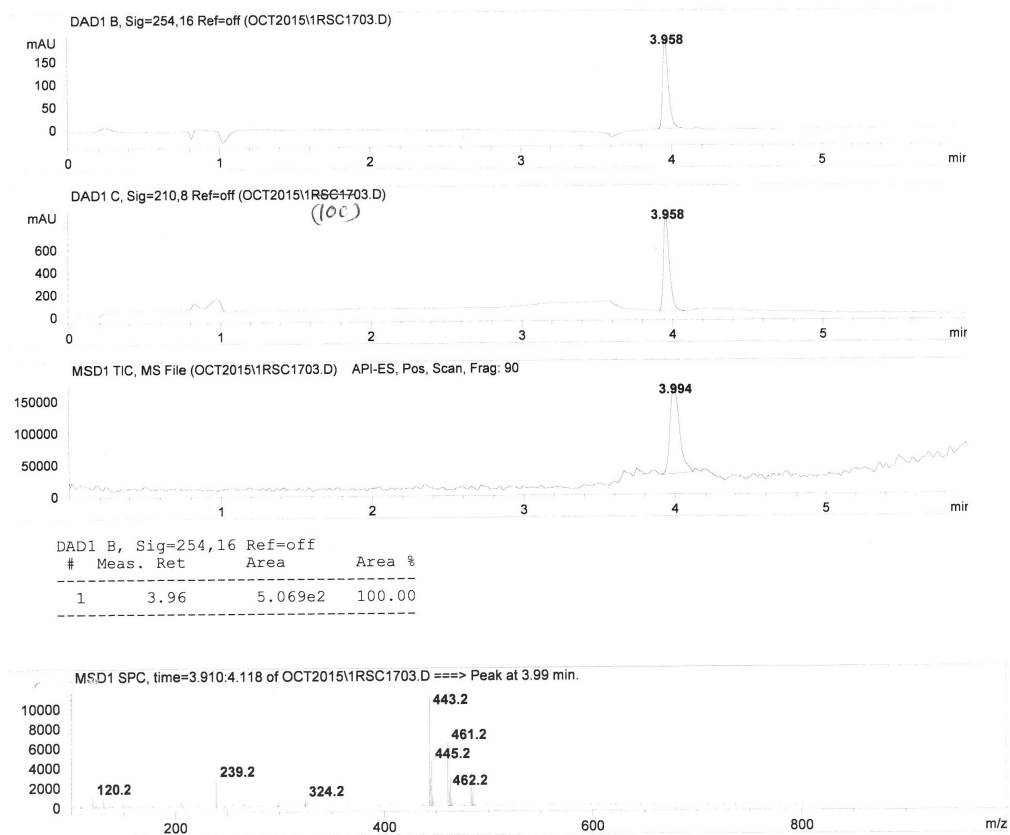

Figure S18:  $^1\text{H}$  NMR of compound 10c

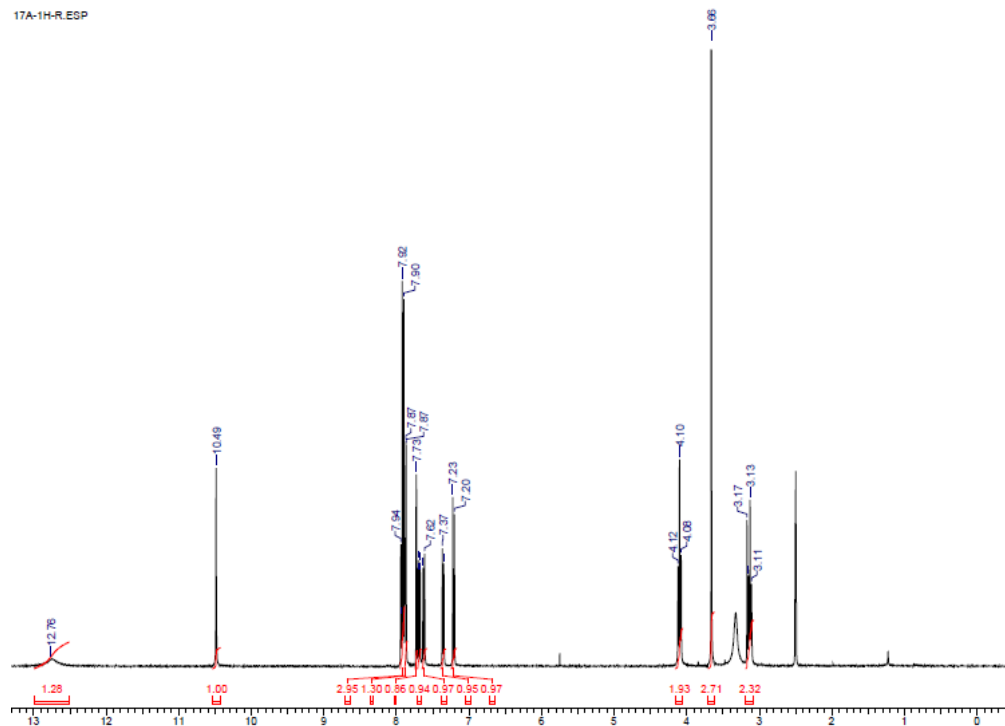

### LCMS of compound 17a

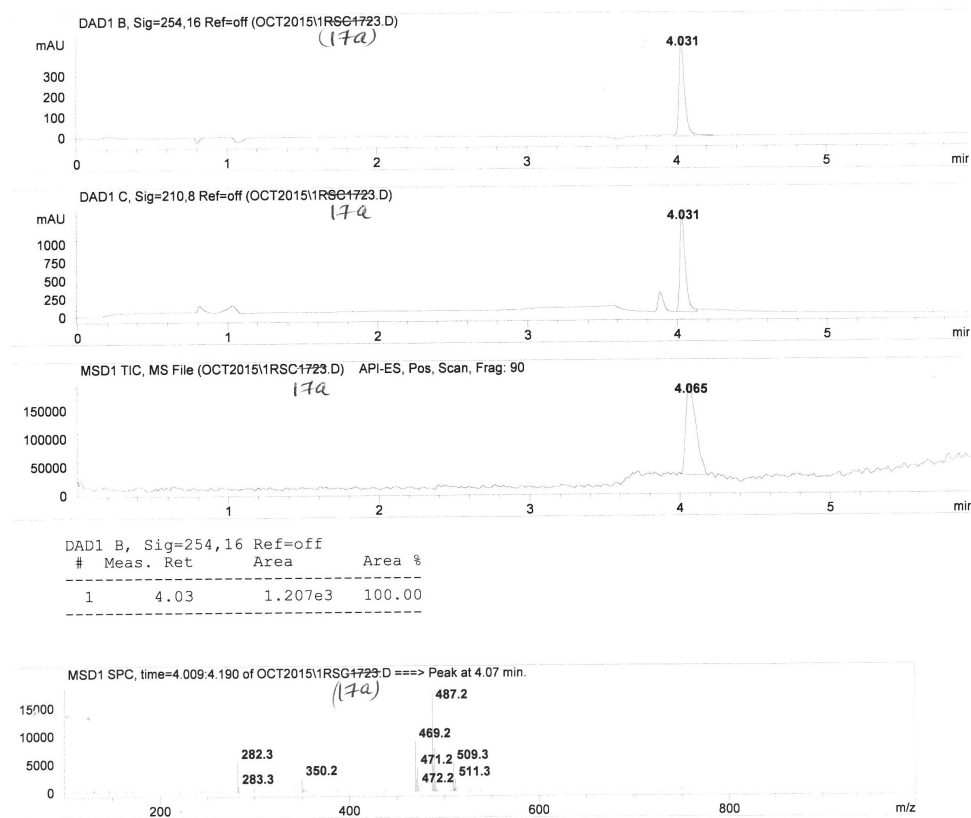

Figure S19:  $^1\text{H}$  NMR of compound 17a



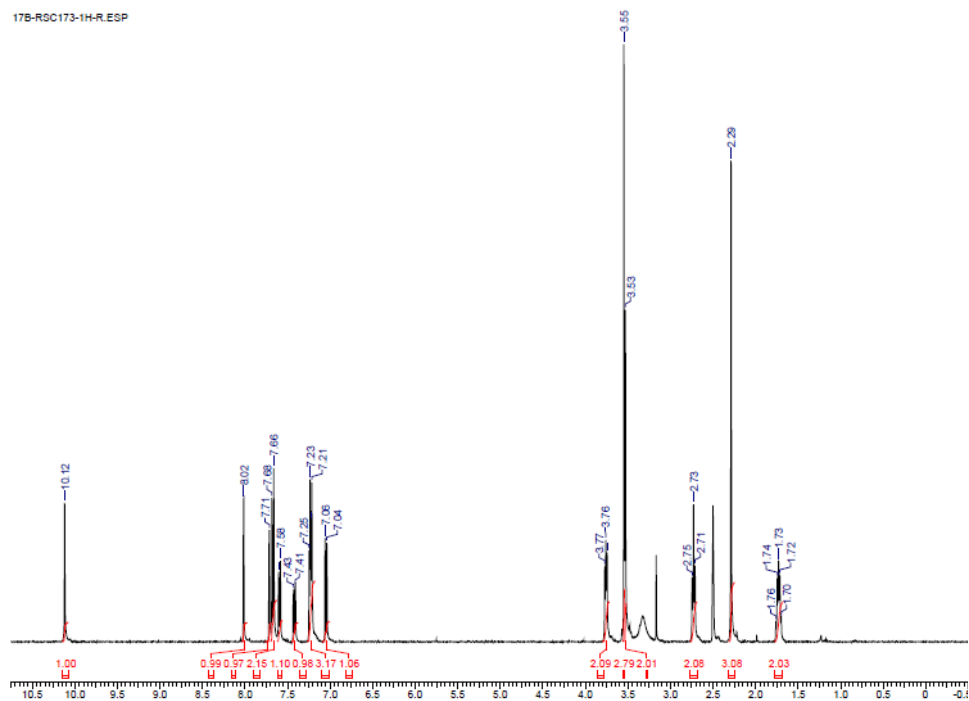

### LCMS of compound **17b**

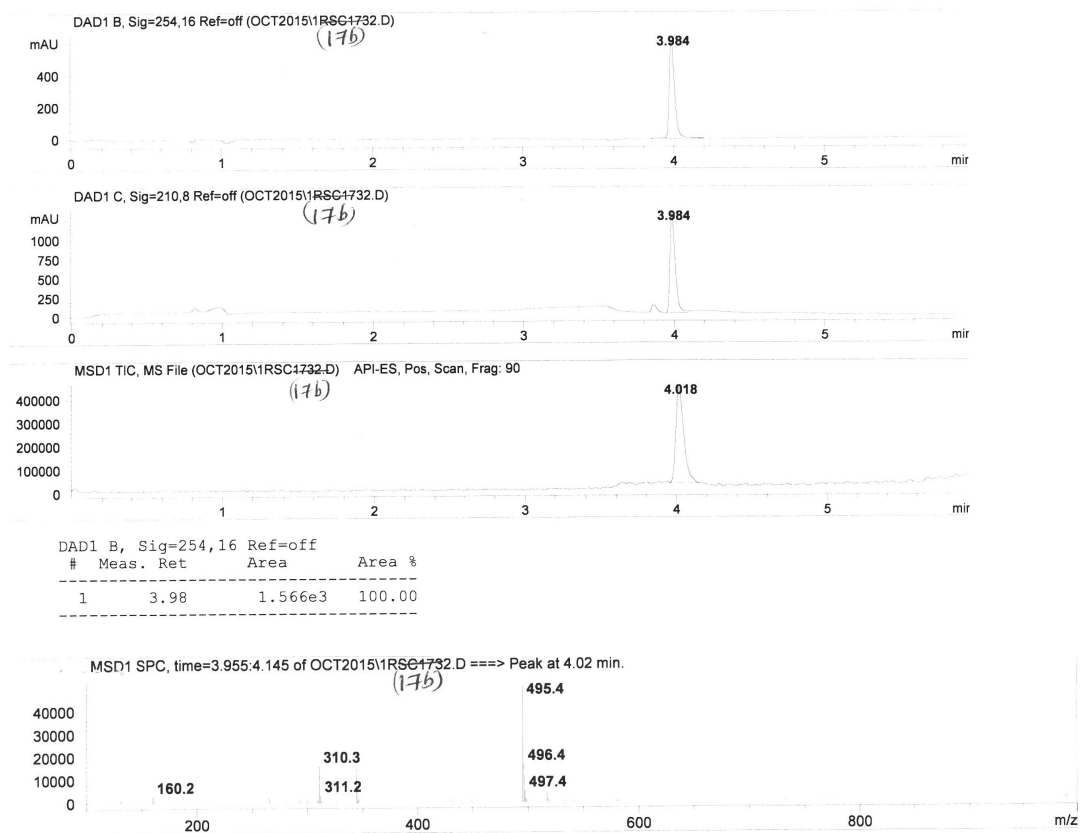

Figure S20:  $^1\text{H}$  NMR of compound **17b**

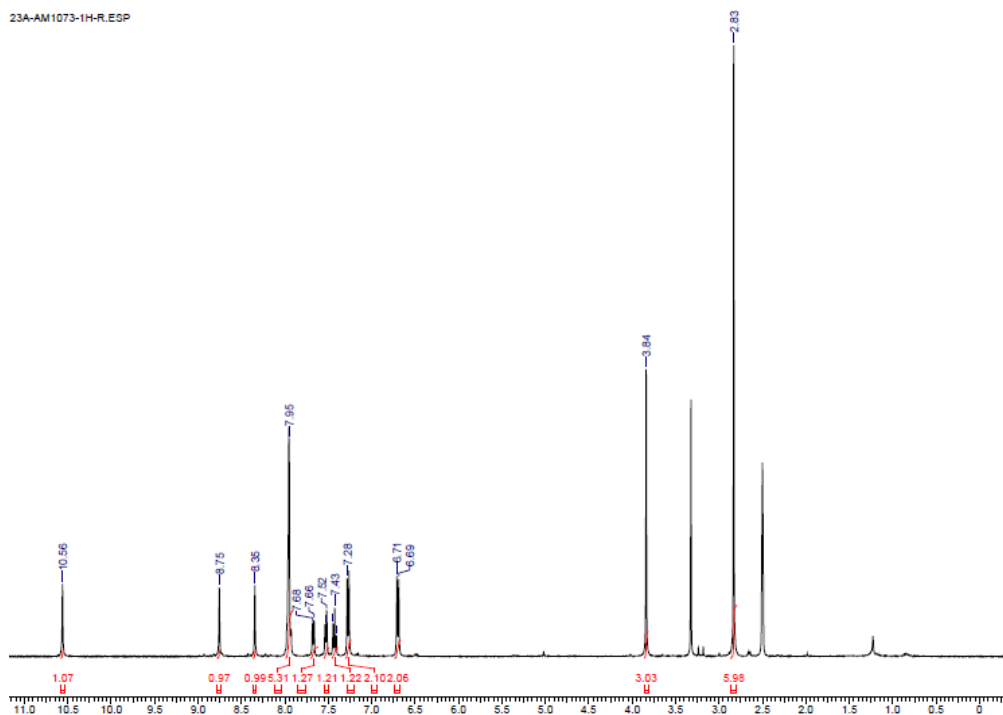

### LCMS of compound **23a**

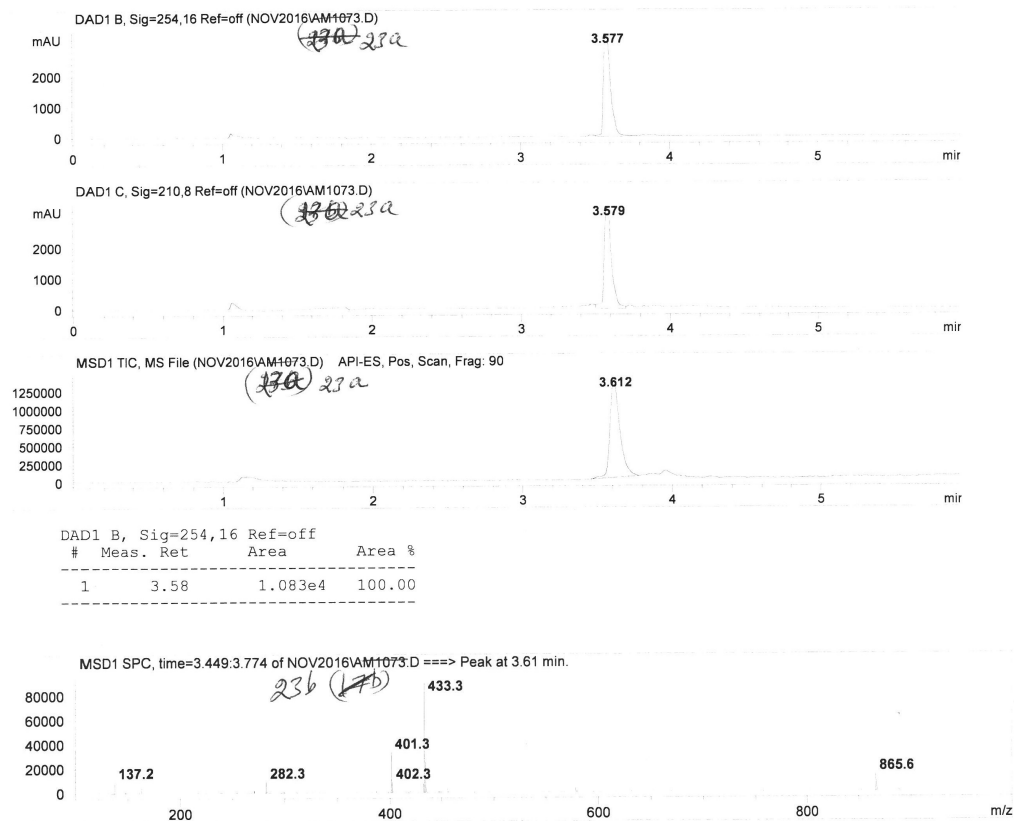

Figure S21:  $^1\text{H}$  NMR of compound **23a**

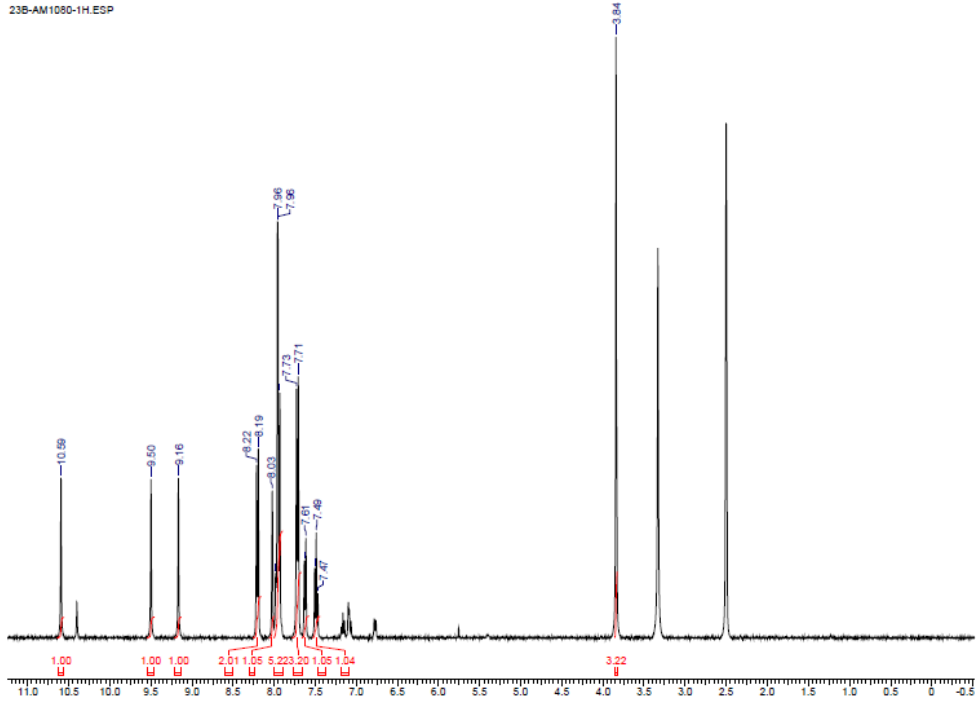

LCMS of compound **23b**

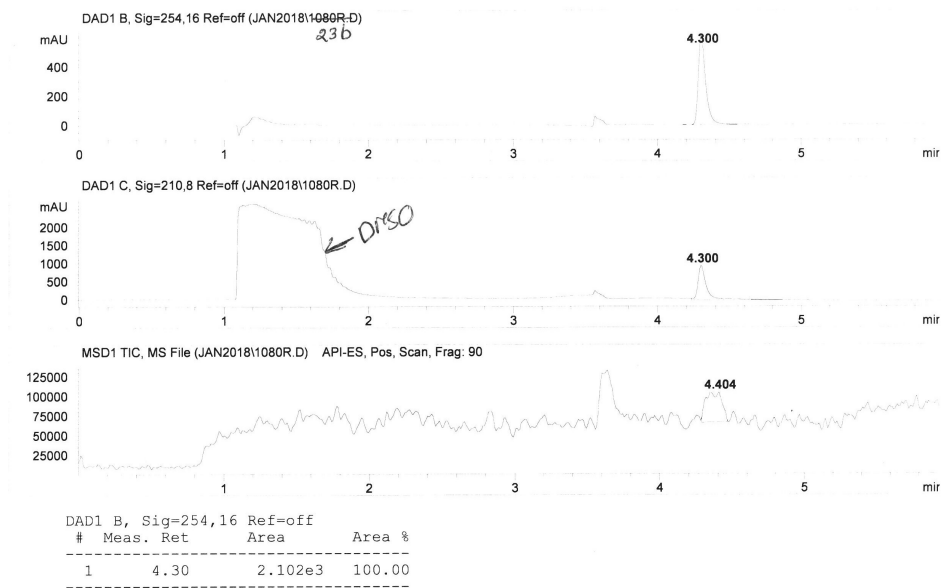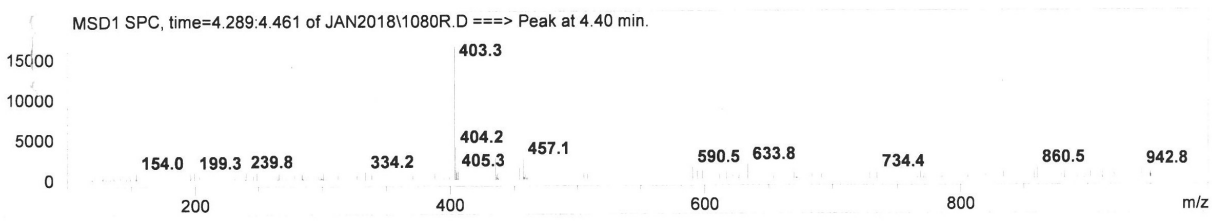

Figure S22: <sup>1</sup>H NMR of compound **23b**

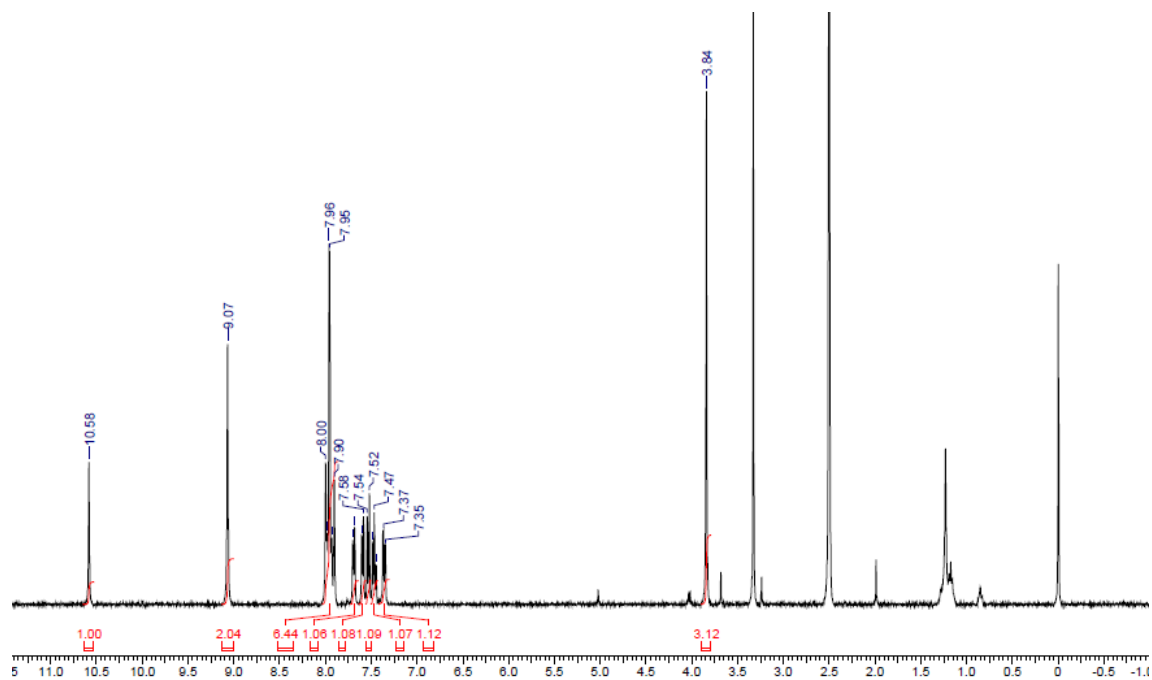

### LCMS of compound **23c**

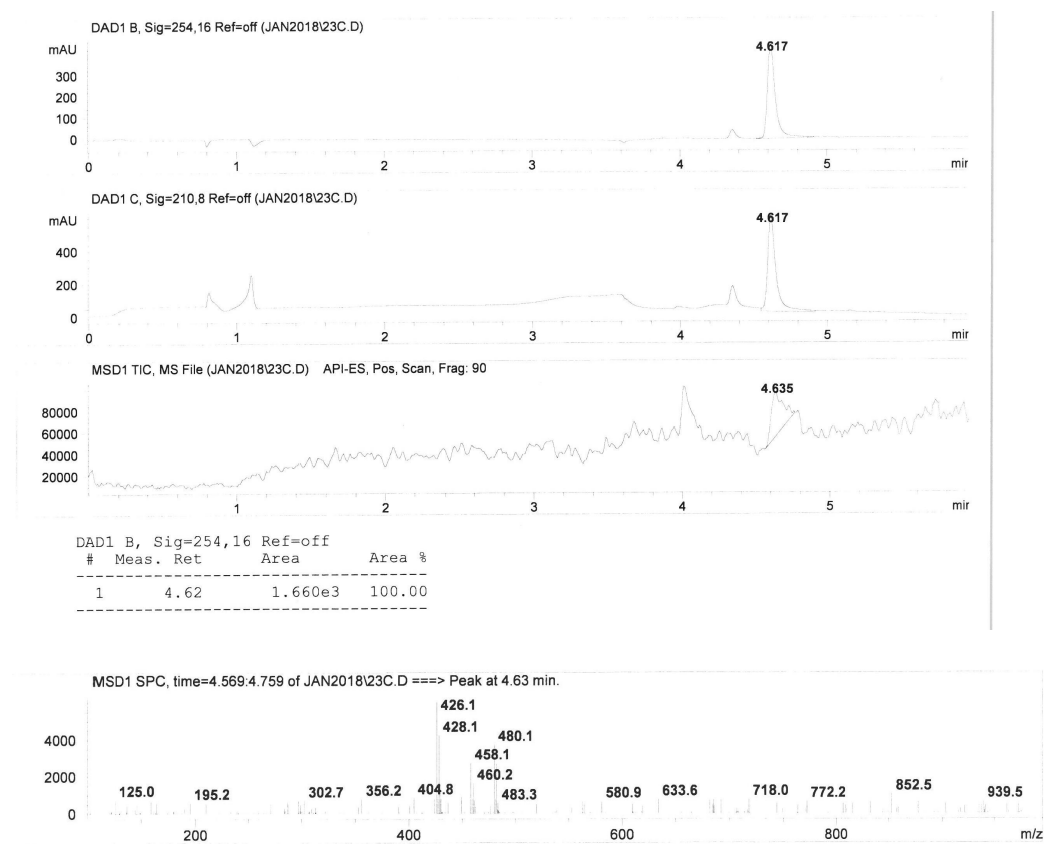

Figure S23:  $^1\text{H}$  NMR of compound **23c**

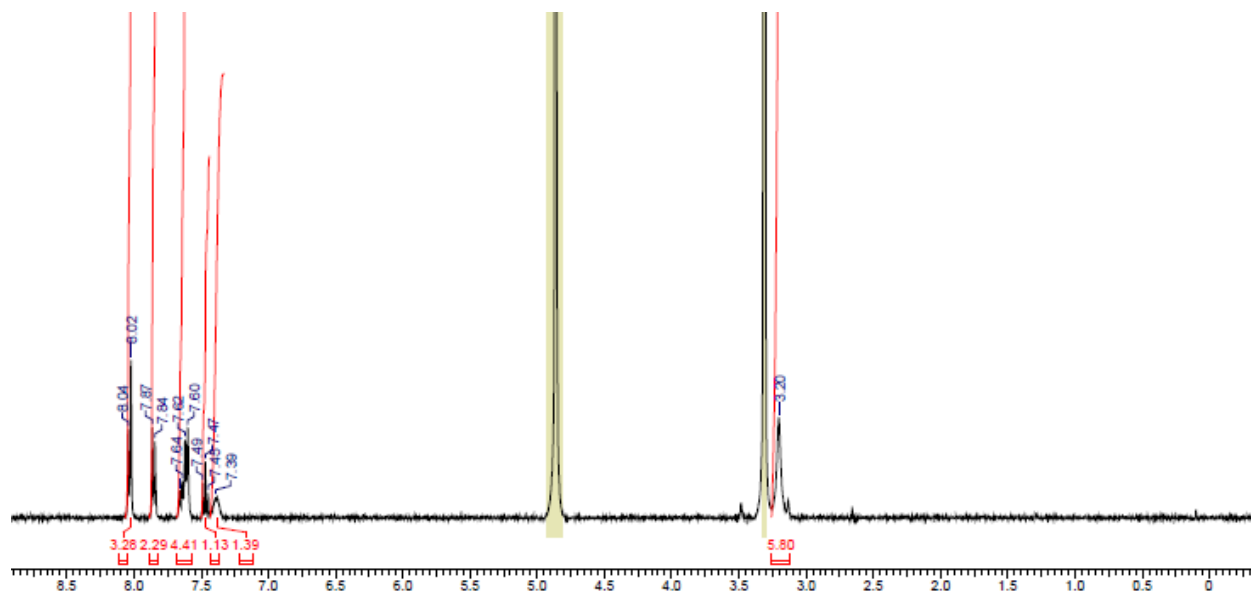

### LCMS of compound **24a**

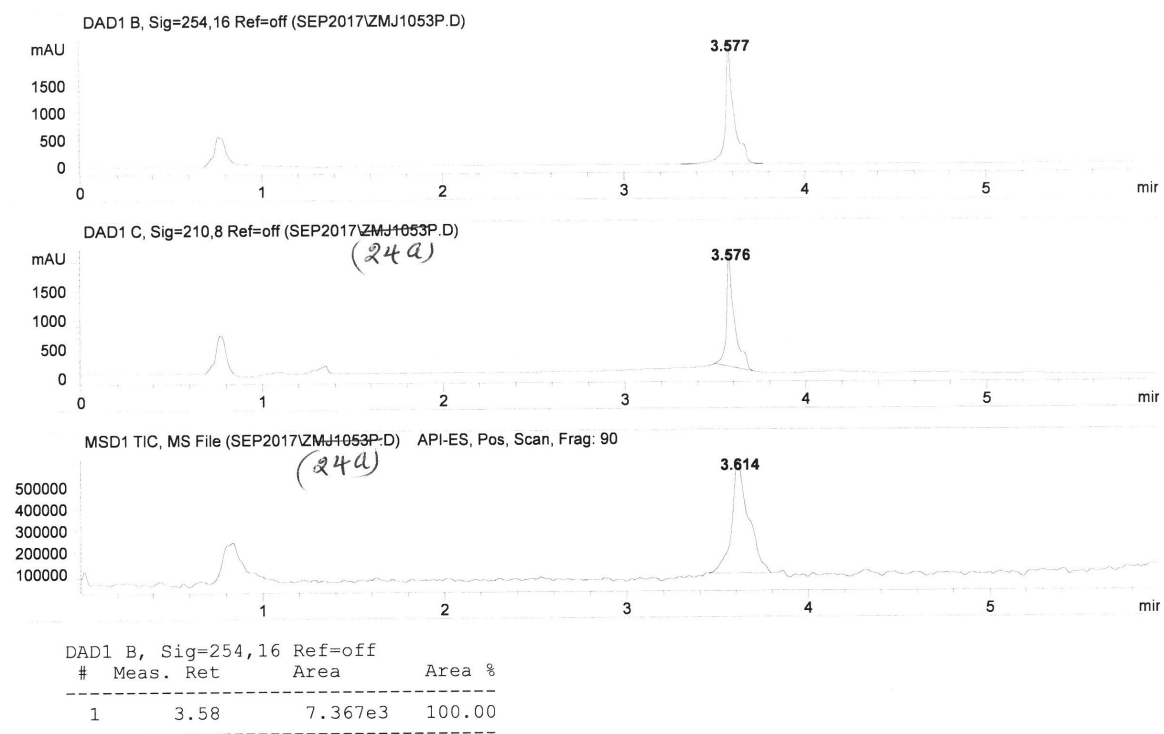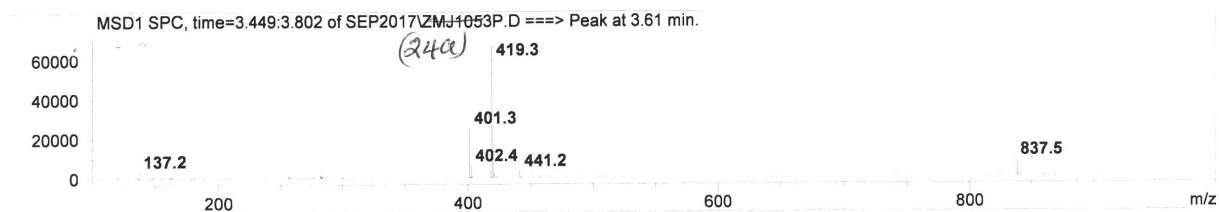

Figure S24:  $^1\text{H}$  NMR of compound **24a**

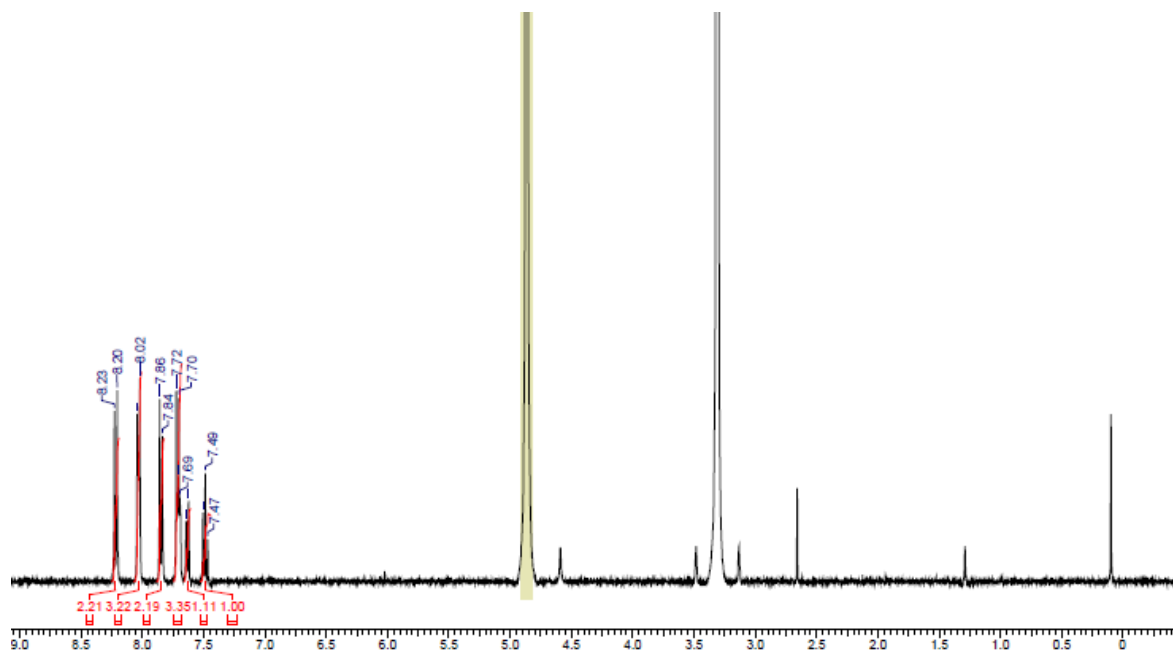

LCMS of compound **24b**

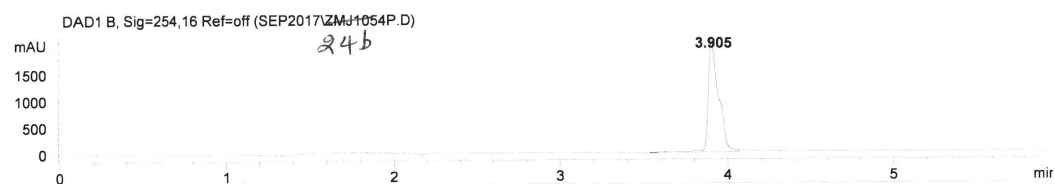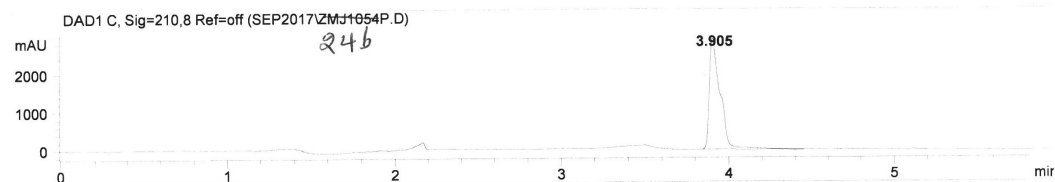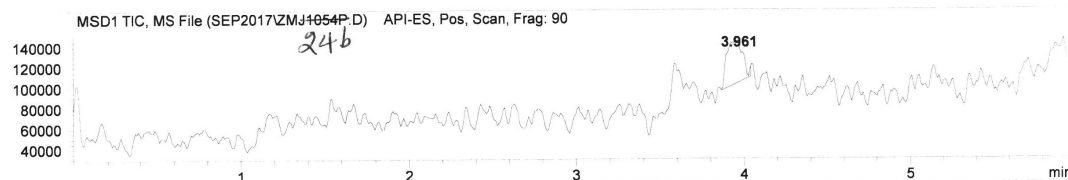

DAD1 B, Sig=254,16 Ref=off

| # | Meas. Ret | Area    | Area % |
|---|-----------|---------|--------|
| 1 | 3.90      | 8.977e3 | 100.00 |

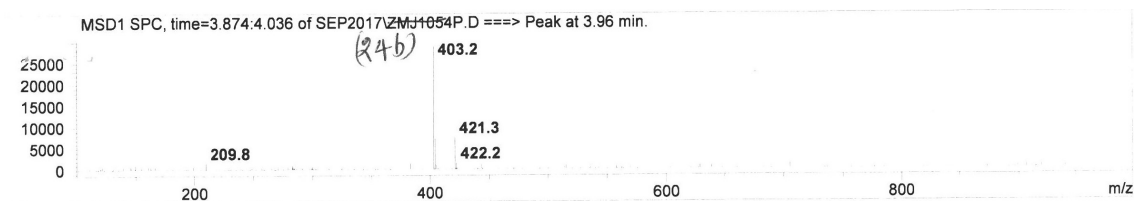

Figure S25:  $^1\text{H}$  NMR of compound **24b**

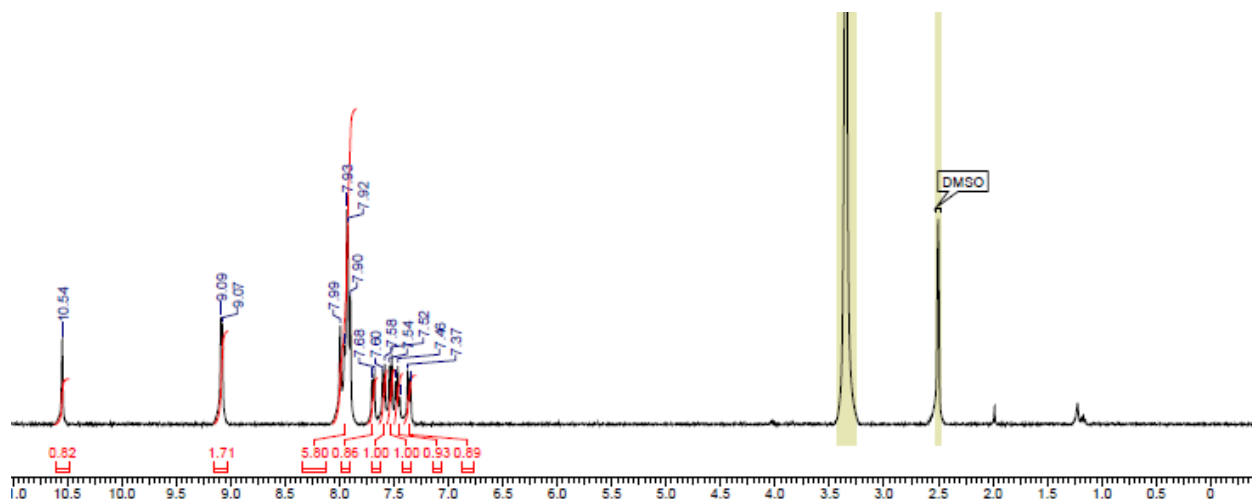

### LCMS of compound 24c

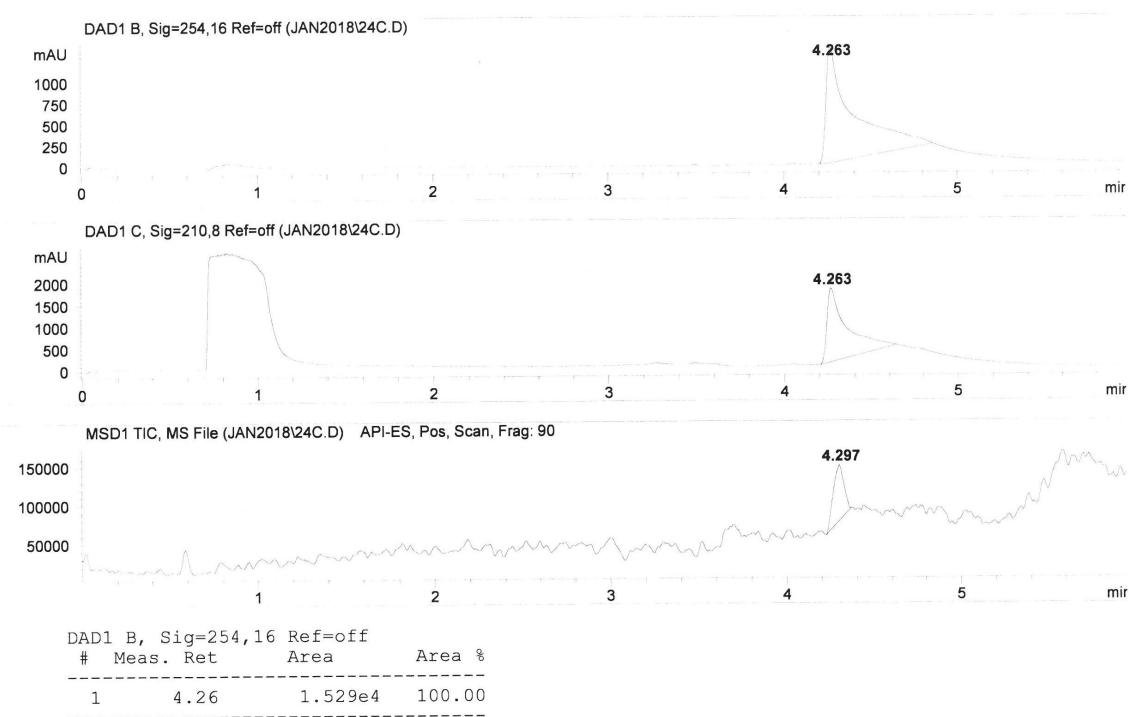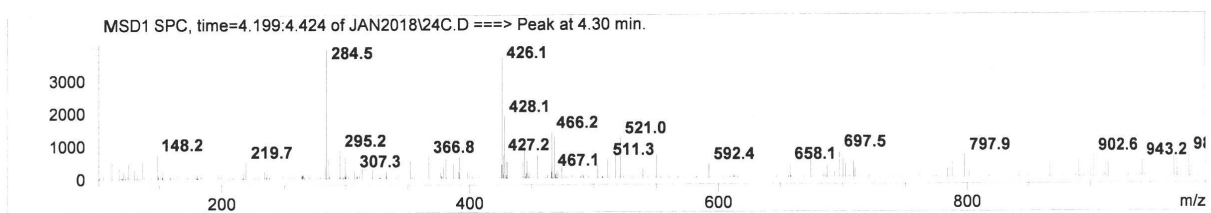

Figure S26:  $^1\text{H}$  NMR of compound 24c

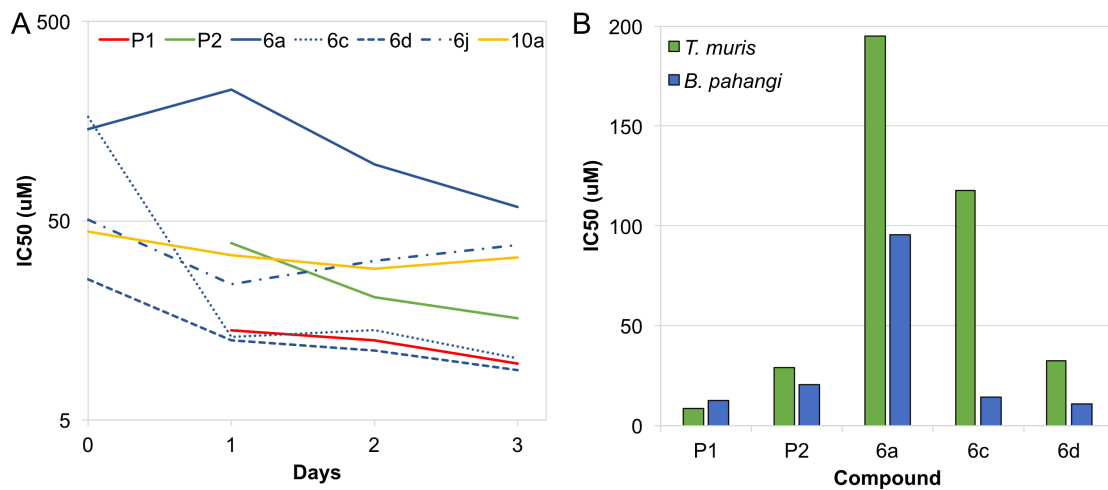

Figure S27: Time- and species- dependence of the IC<sub>50</sub> values. A) *Brugia pahangi* IC<sub>50</sub> values for seven compounds over three days of exposure; B) *Trichuris muris* and *B. pahangi* IC<sub>50</sub> values for five compounds at day 2.



## Bioaccumulation Analysis Figures

Samples are from either *B. pahangi* or *T. muris* as indicated in upper right hand corner. Figure number and compound names are in upper right hand corner, as well as protein concentration of the sample. Molecular structure, formula, and exact mass are located at the bottom of each figure.

Mass spectrograms contain four panels (except DMSO):

- A) Absorbance of 254 nm UV
- B) Absorbance of 210 nm UV
- C) Total ion chromatogram
- D) Extracted ion chromatogram of  $[M+H]^+$  for test compound (except DMSO)

When compound identified to be present, the MS time scan follows. In some cases the compound detection is below the limit of detection and not included.

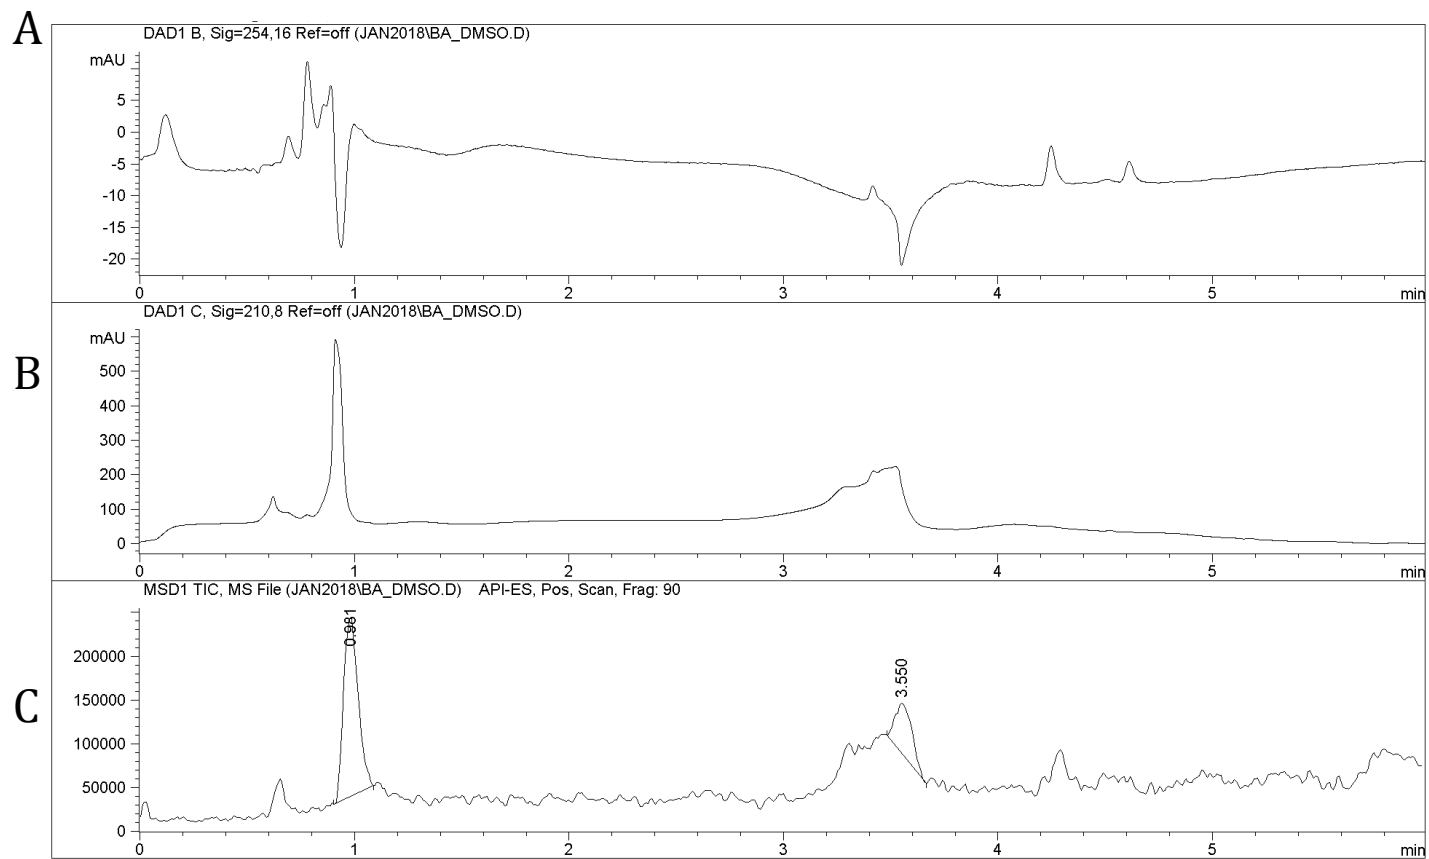

Figure S28:

*B. pahangi* DMSO  
4.52 mg/mL [protein]  
8 worms per sample

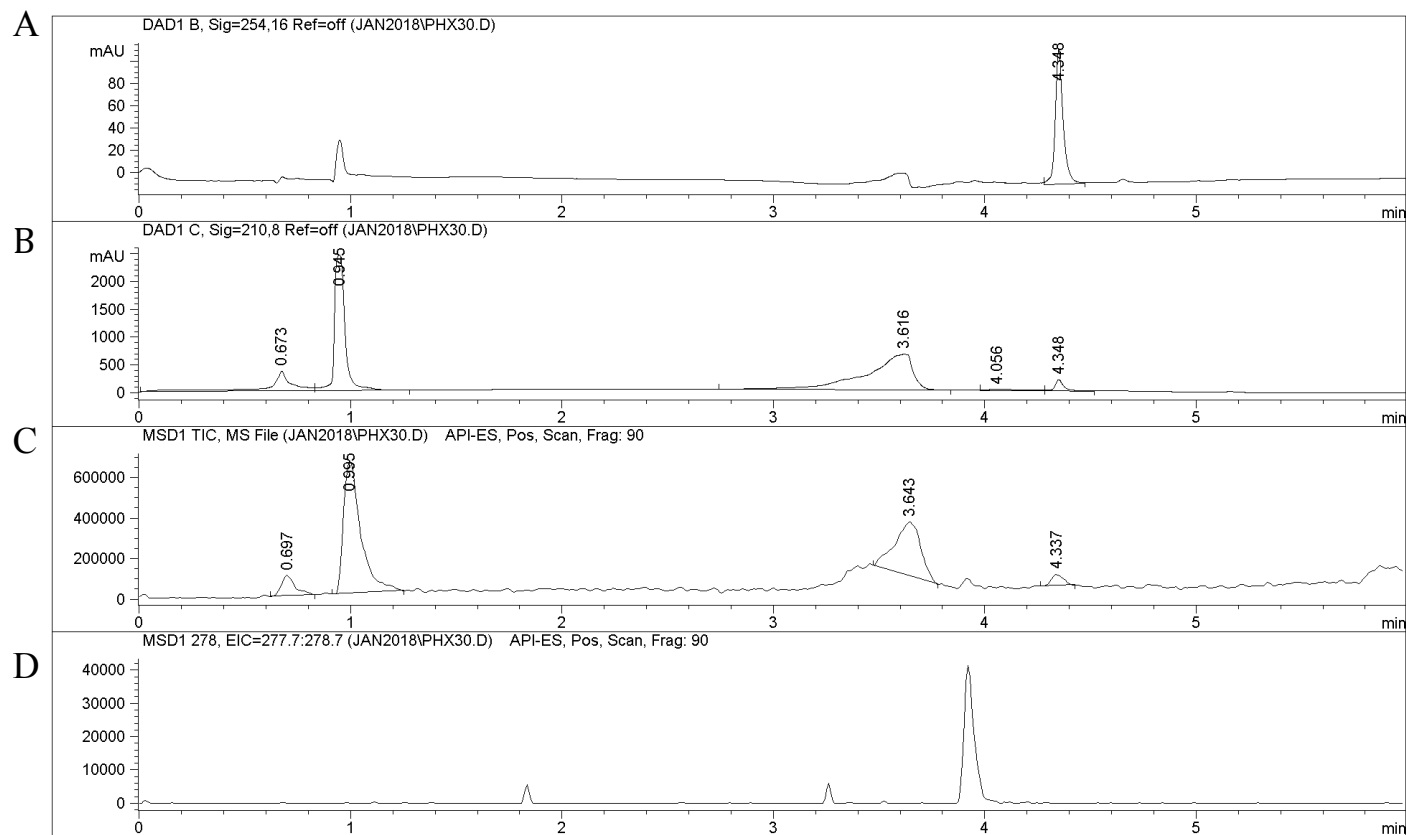

Figure S29:  
*B. pahangi*  
**Compound P1**  
 1.14 mg/mL [protein]

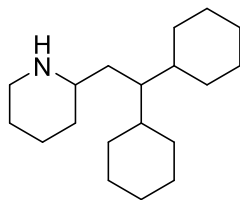

Chemical Formula: C<sub>19</sub>H<sub>35</sub>N  
 Exact Mass: 277.28

\*MSD1 SPC, time=3.874:4.000 of JAN2018\PHX30.D API-ES, Pos, Scan, Frag: 90

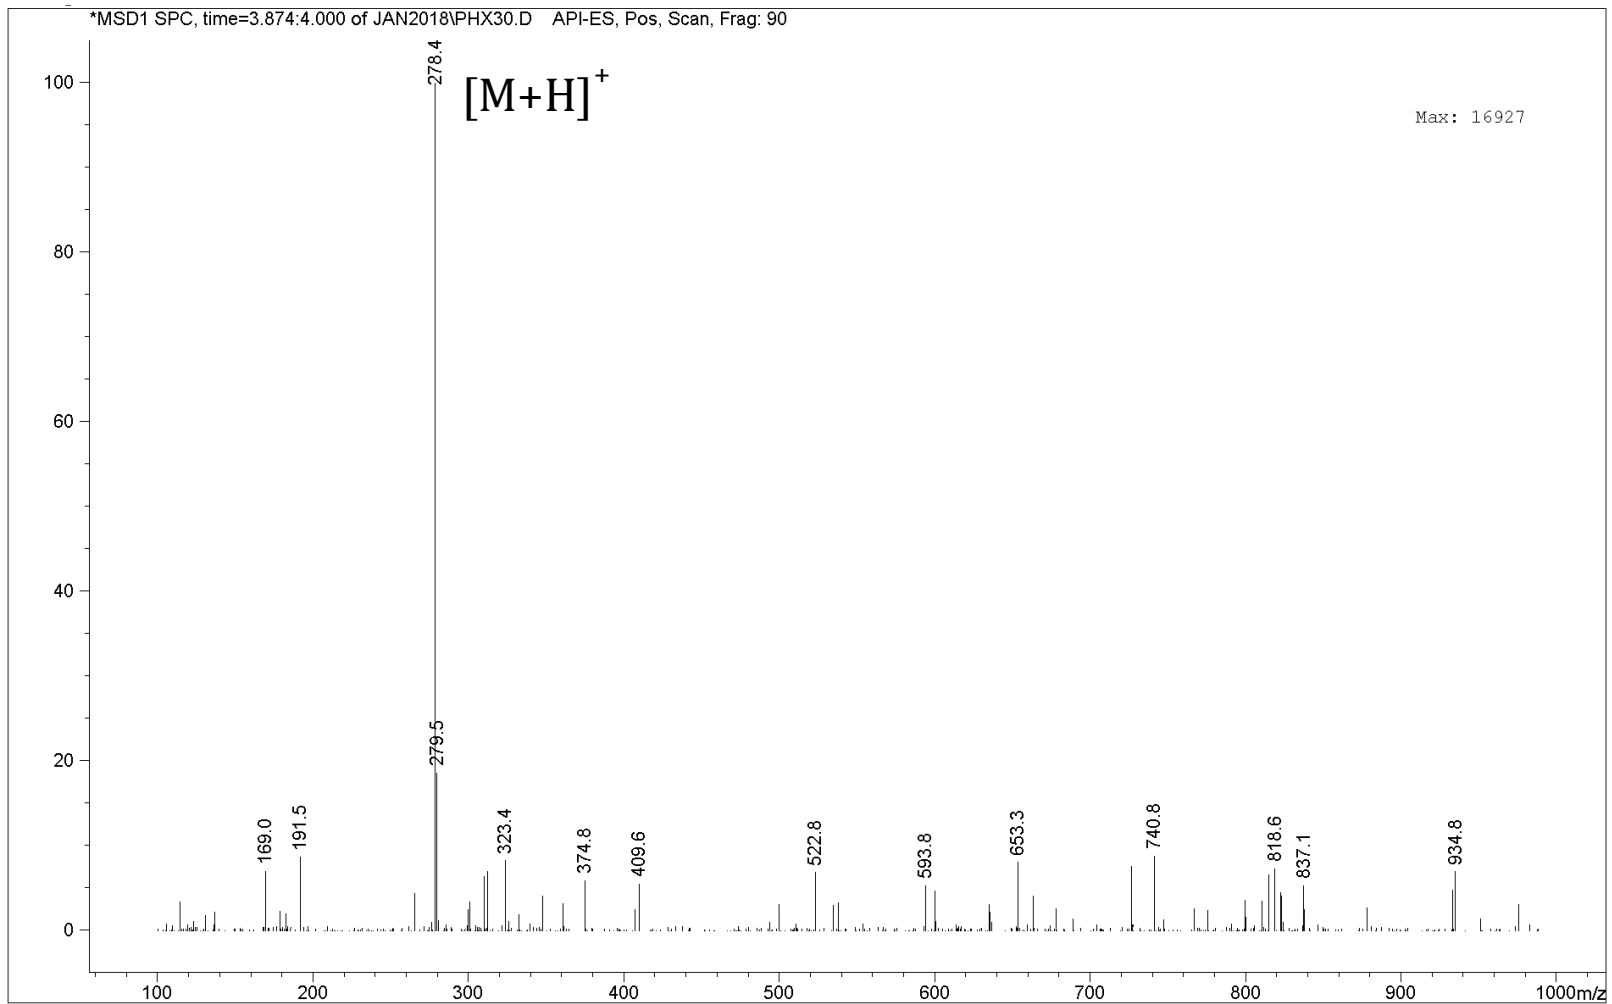

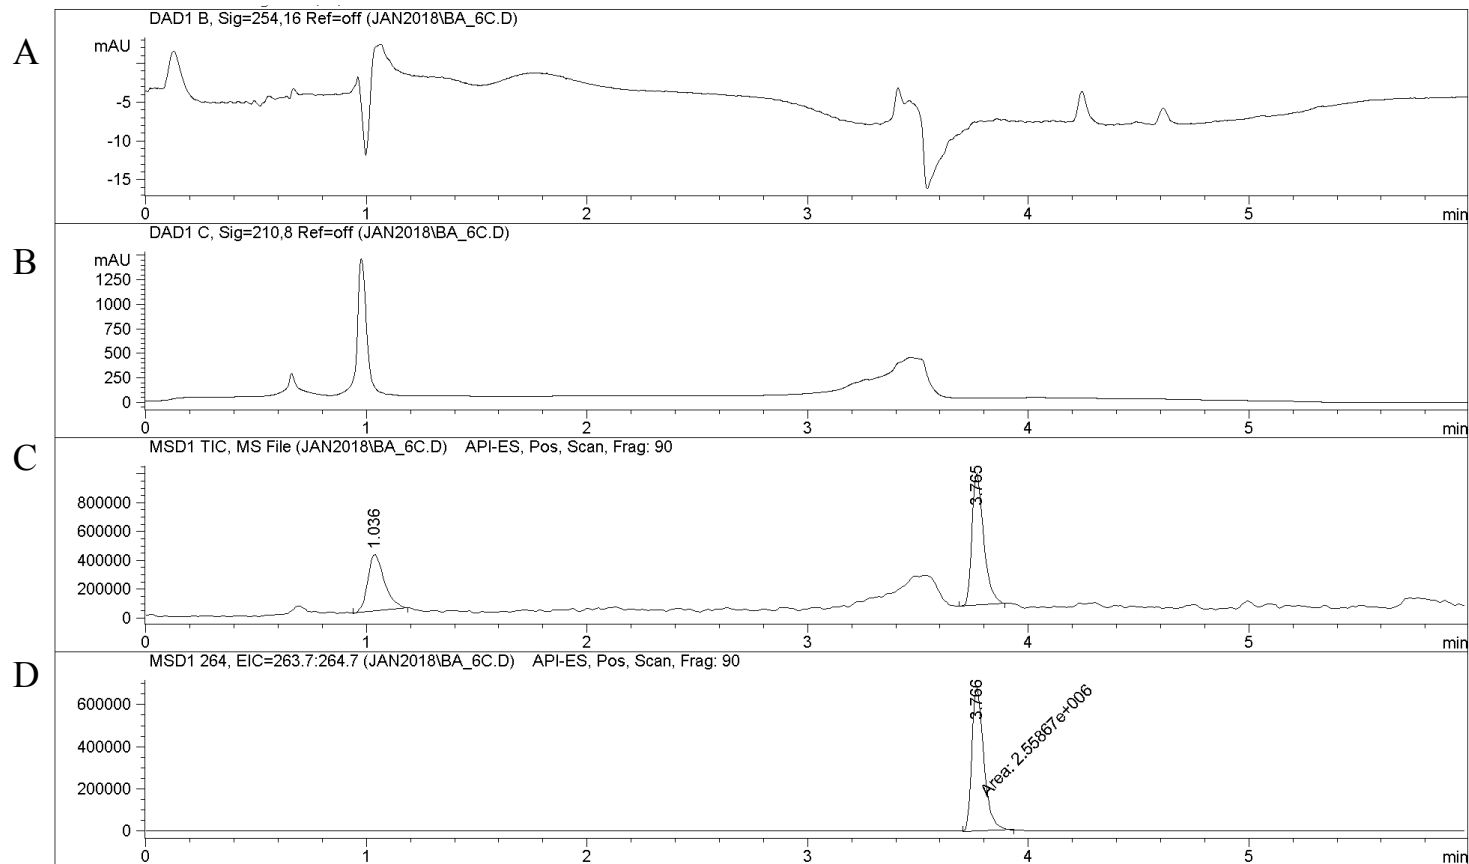

Figure S30:  
*B. pahangi*  
**Compound P1a**  
 4.06 mg/mL [protein]

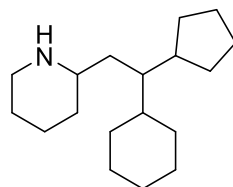

Chemical Formula: C<sub>18</sub>H<sub>33</sub>N  
 Exact Mass: 263.26  
 S33

\*MSD1 SPC, time=3.729:3.838 of JAN2018\BA\_6C.D API-ES, Pos, Scan, Frag: 90

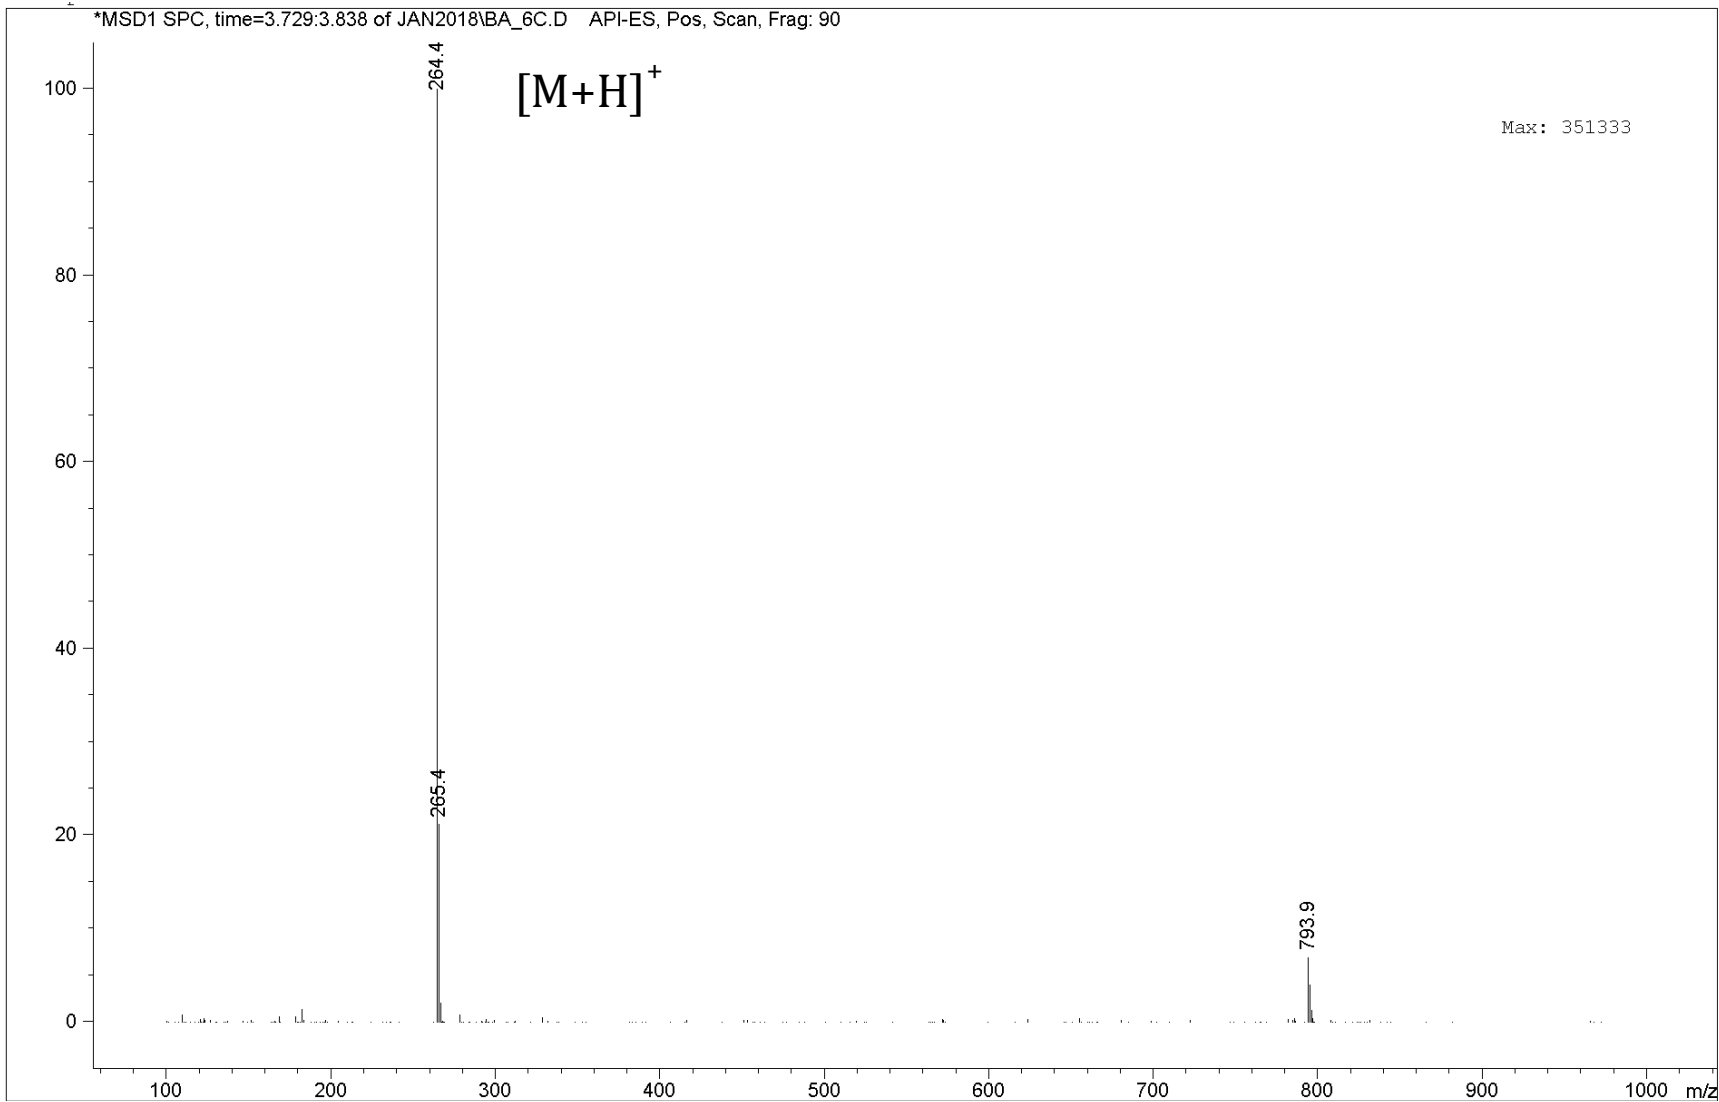

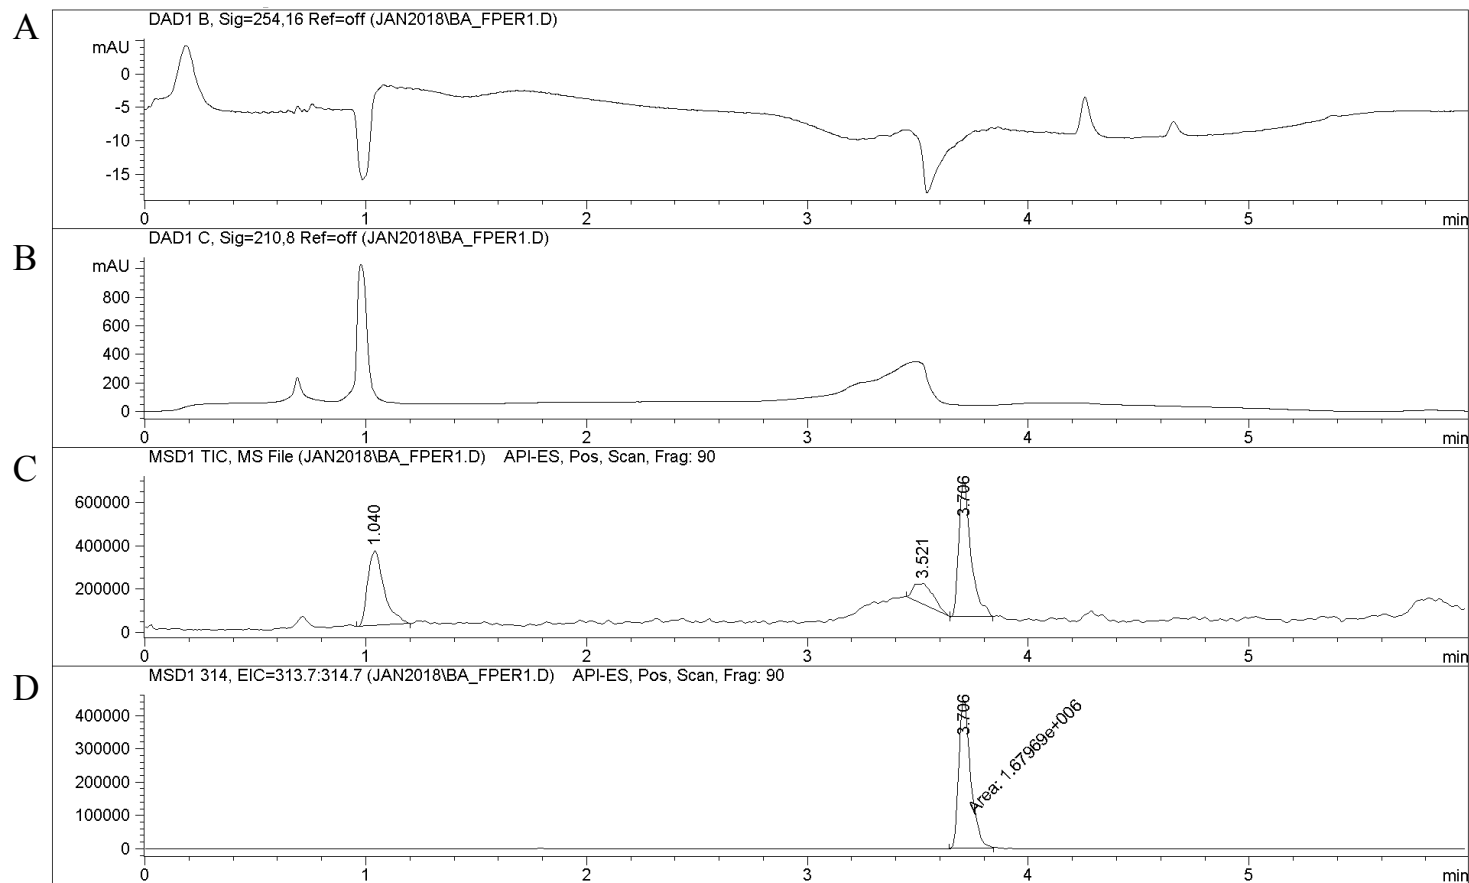

Figure S31:  
*B. Pahangi*  
**Compound P1b**  
 3.05 mg/mL [protein]  
 8 worms per sample

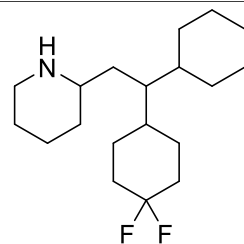

Chemical Formula: C<sub>19</sub>H<sub>33</sub>F<sub>2</sub>N

Exact Mass: 313.26

\*MSD1 SPC, time=3.675:3.747 of JAN2018\BA\_FPER1.D API-ES, Pos, Scan, Frag: 90

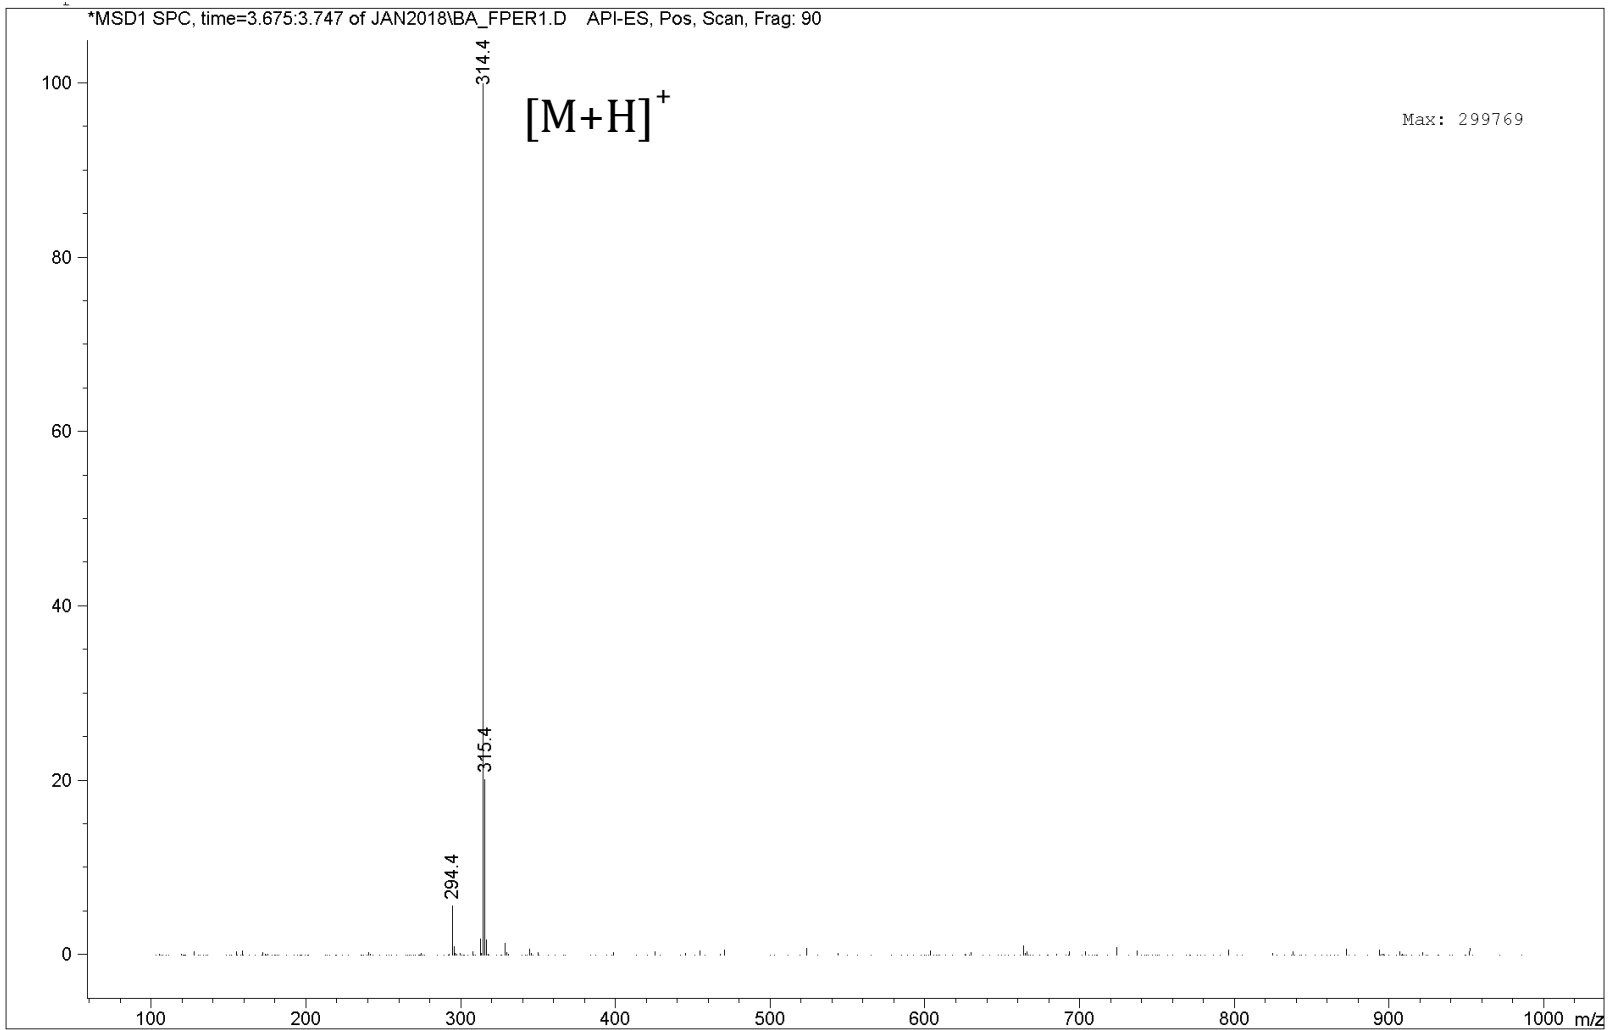



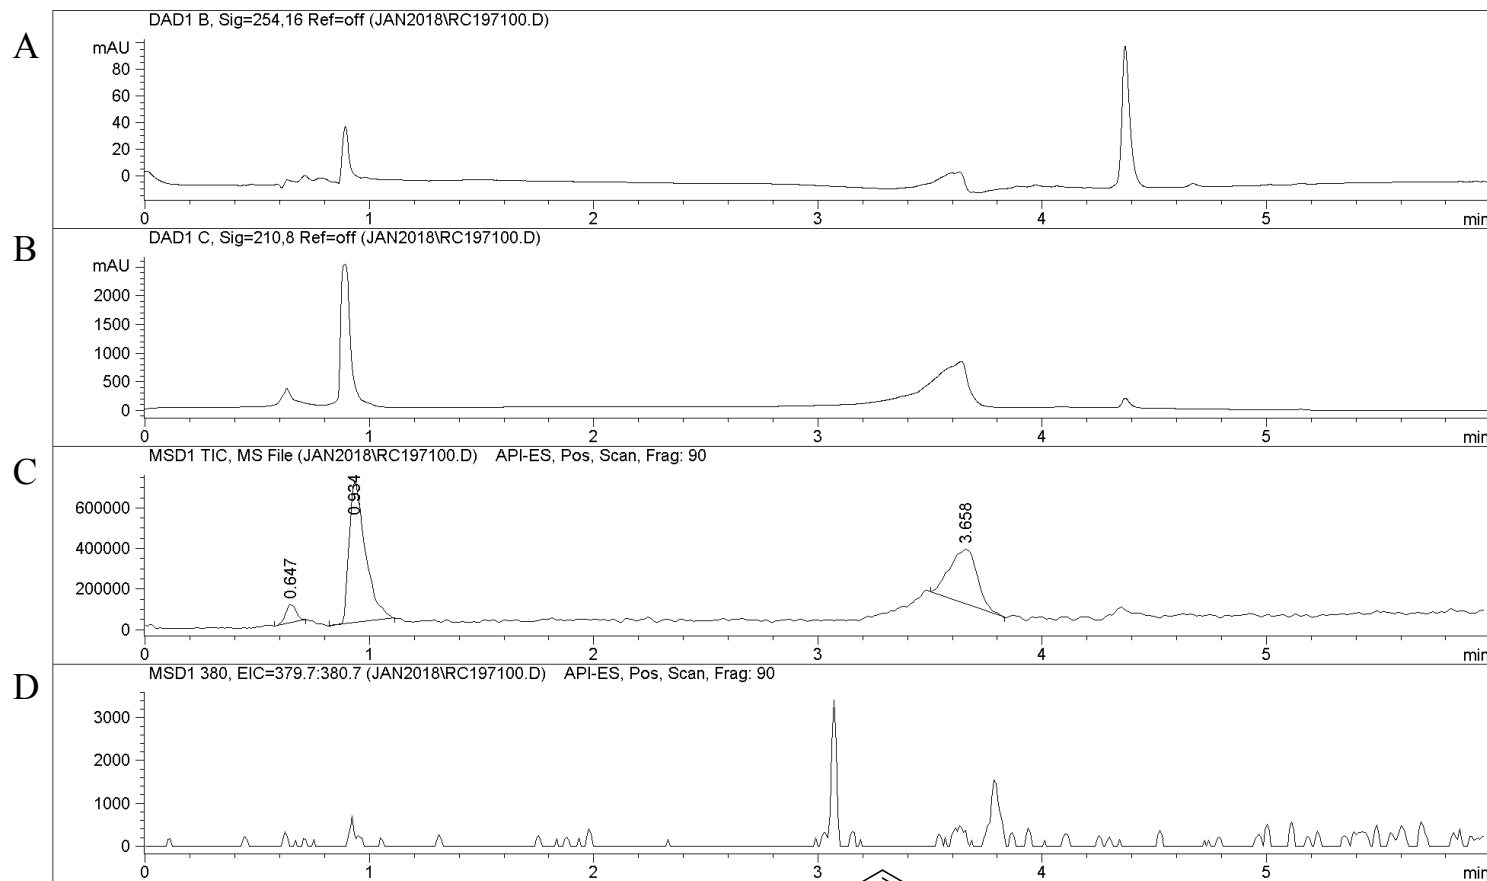

Figure S32:  
*B. Pahangi*  
**Compound 6a**  
 1.37 mg/mL [protein]

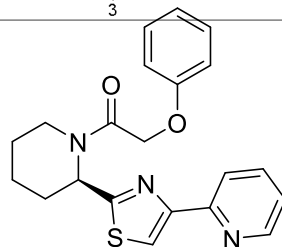

Chemical Formula: C<sub>21</sub>H<sub>21</sub>N<sub>3</sub>O<sub>2</sub>S

Exact Mass: 379.14

S37

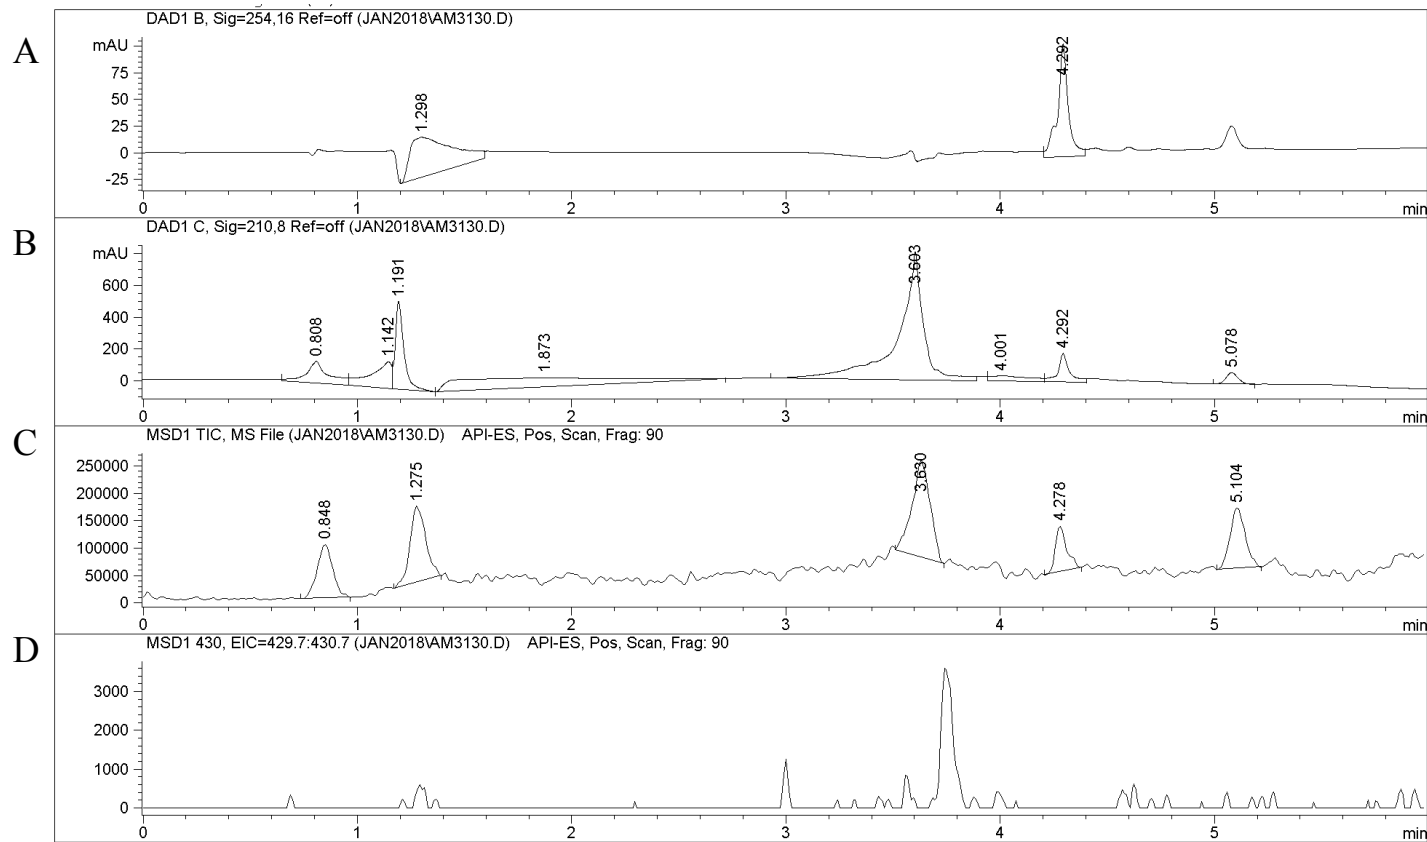

Figure S33:  
*B. Pahangi*  
**Compound 6c**  
 1.14 mg/mL [protein]  
 3 worms per sample

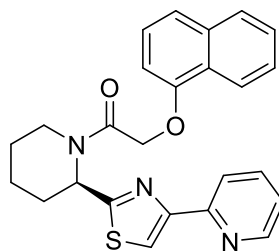

Chemical Formula: C<sub>25</sub>H<sub>23</sub>N<sub>3</sub>O<sub>2</sub>S

Exact Mass: 429.15

S38

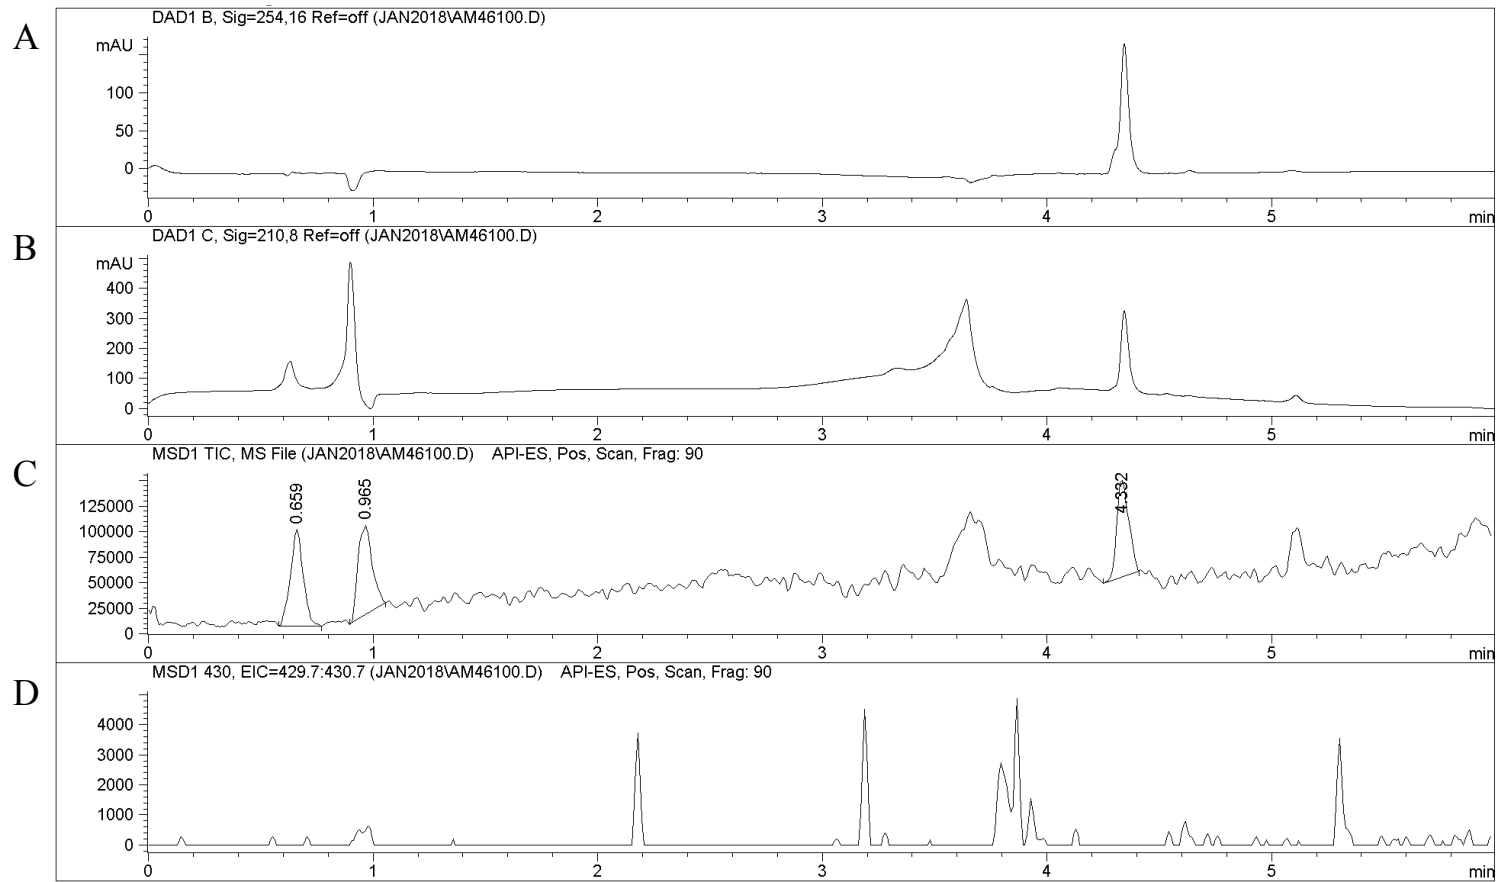

Figure S34:  
*B. Pahangi*  
**Compound 6d**  
 0.97 mg/mL [protein]  
 3 worms per sample

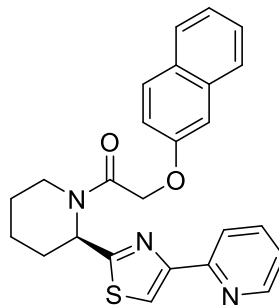

S39

Chemical Formula: C<sub>25</sub>H<sub>23</sub>N<sub>3</sub>O<sub>2</sub>S

Exact Mass: 429.15

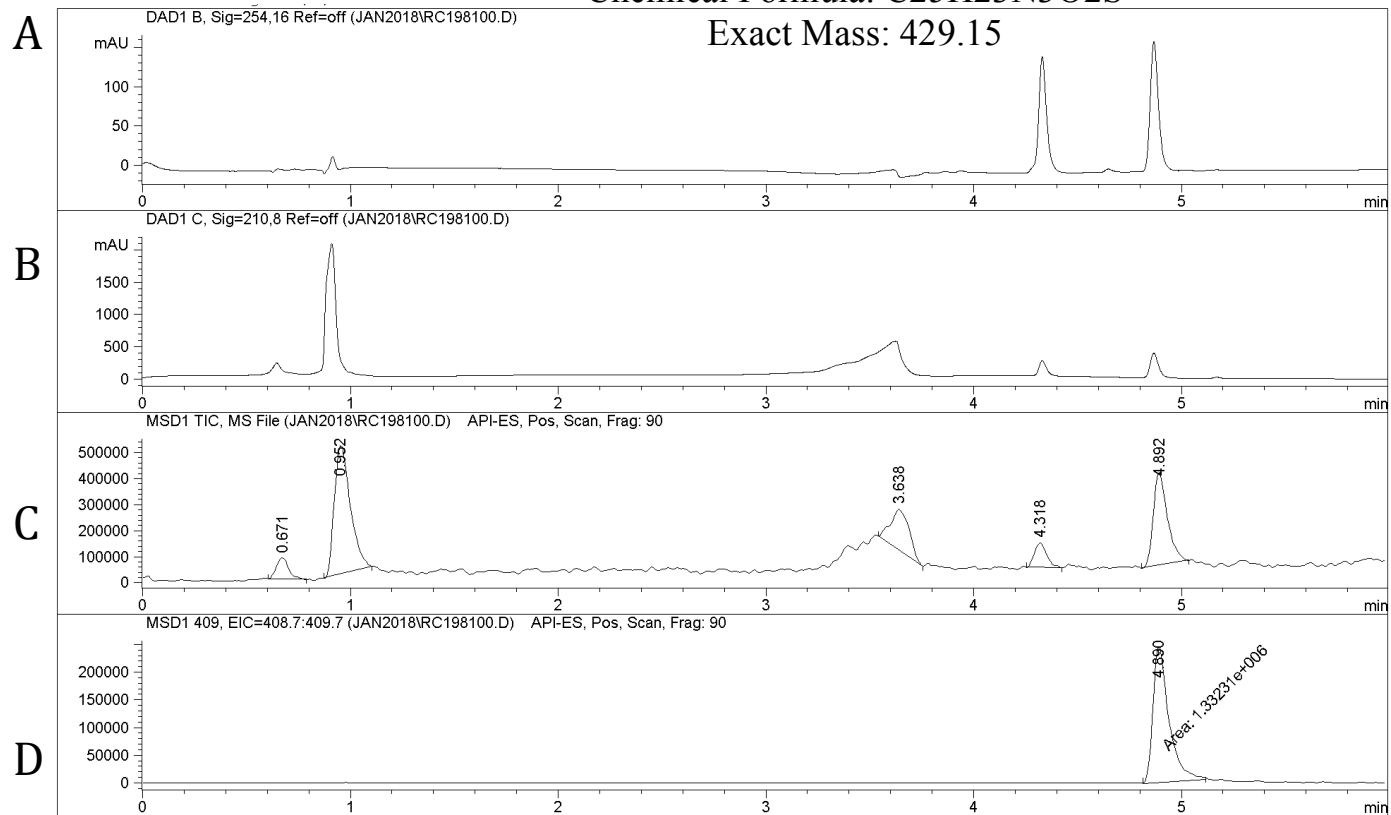

Figure S35:  
*B. Pahangi*  
**Compound 6f**

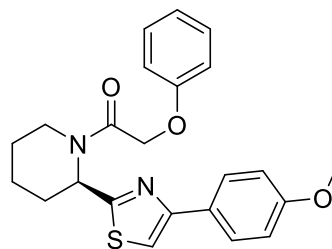

Chemical Formula: C<sub>23</sub>H<sub>24</sub>N<sub>2</sub>O<sub>3</sub>S

Exact Mass: 408.15

\*MSD1 SPC, time=4.858:4.984 of JAN2018\RC198100.D API-ES, Pos, Scan, Frag: 90

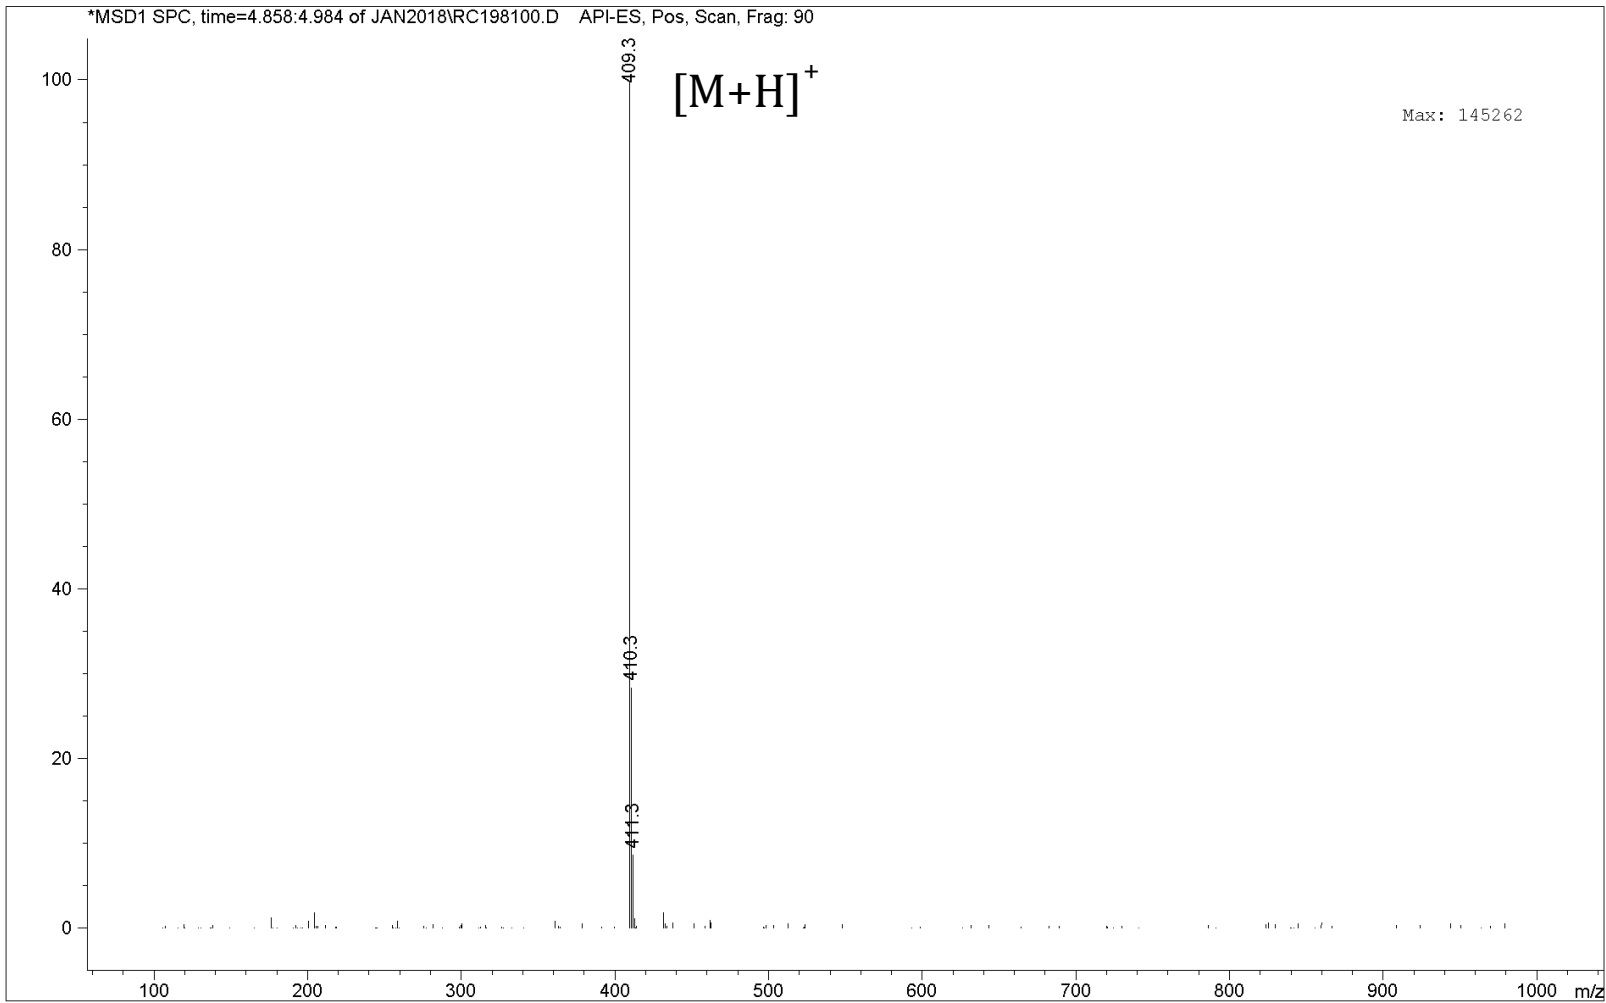

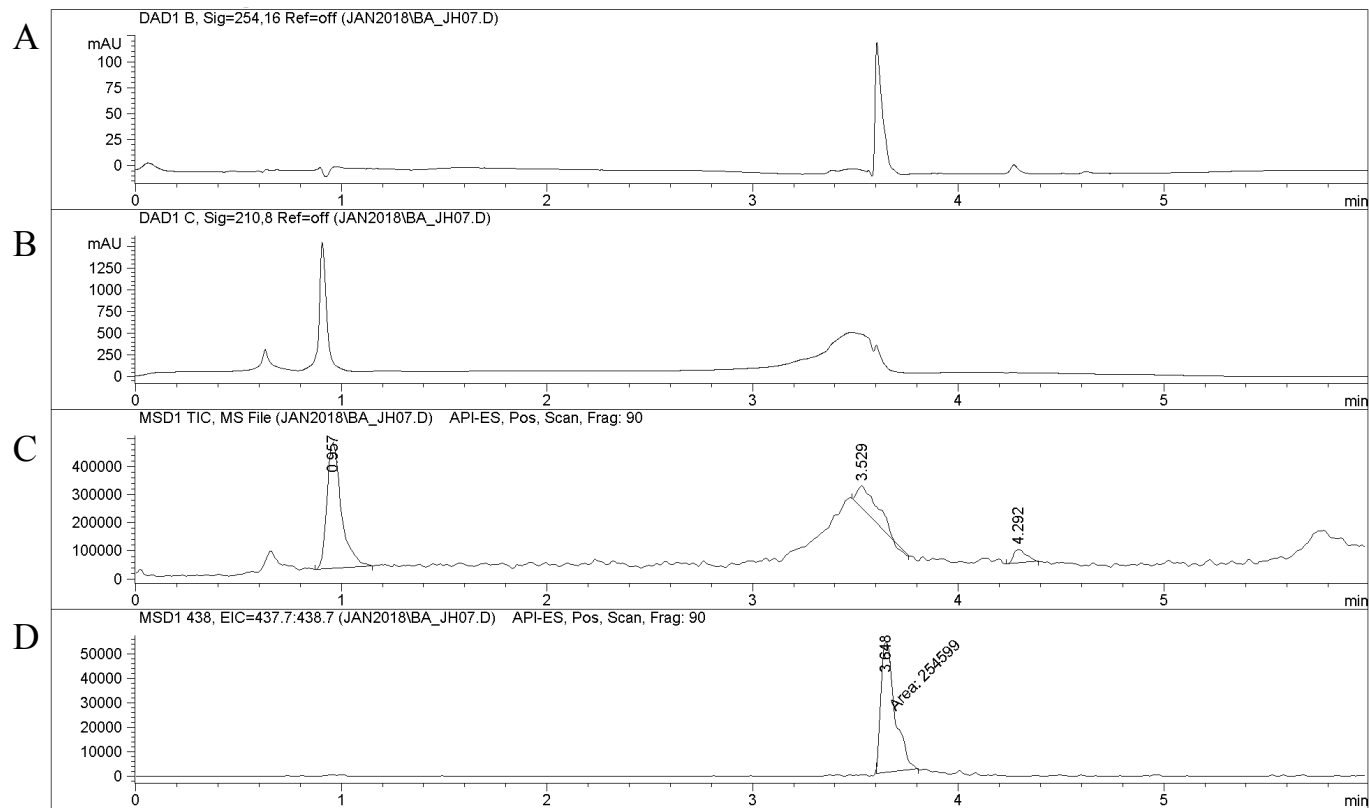

Figure S36:  
*B. Pahangi*  
**Compound 6l**  
 2.32 mg/mL [protein]  
 8 worms per sample

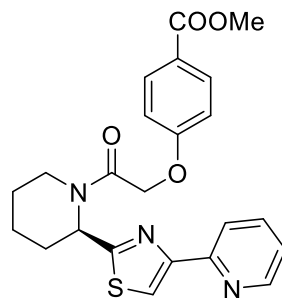

Chemical Formula:  $C_{23}H_{23}N_3O_4S$

Exact Mass: 437.14  
 S42

\*MSD1 SPC, time=3.612:3.747 of JAN2018\BA\_JH07.D API-ES, Pos, Scan, Frag: 90

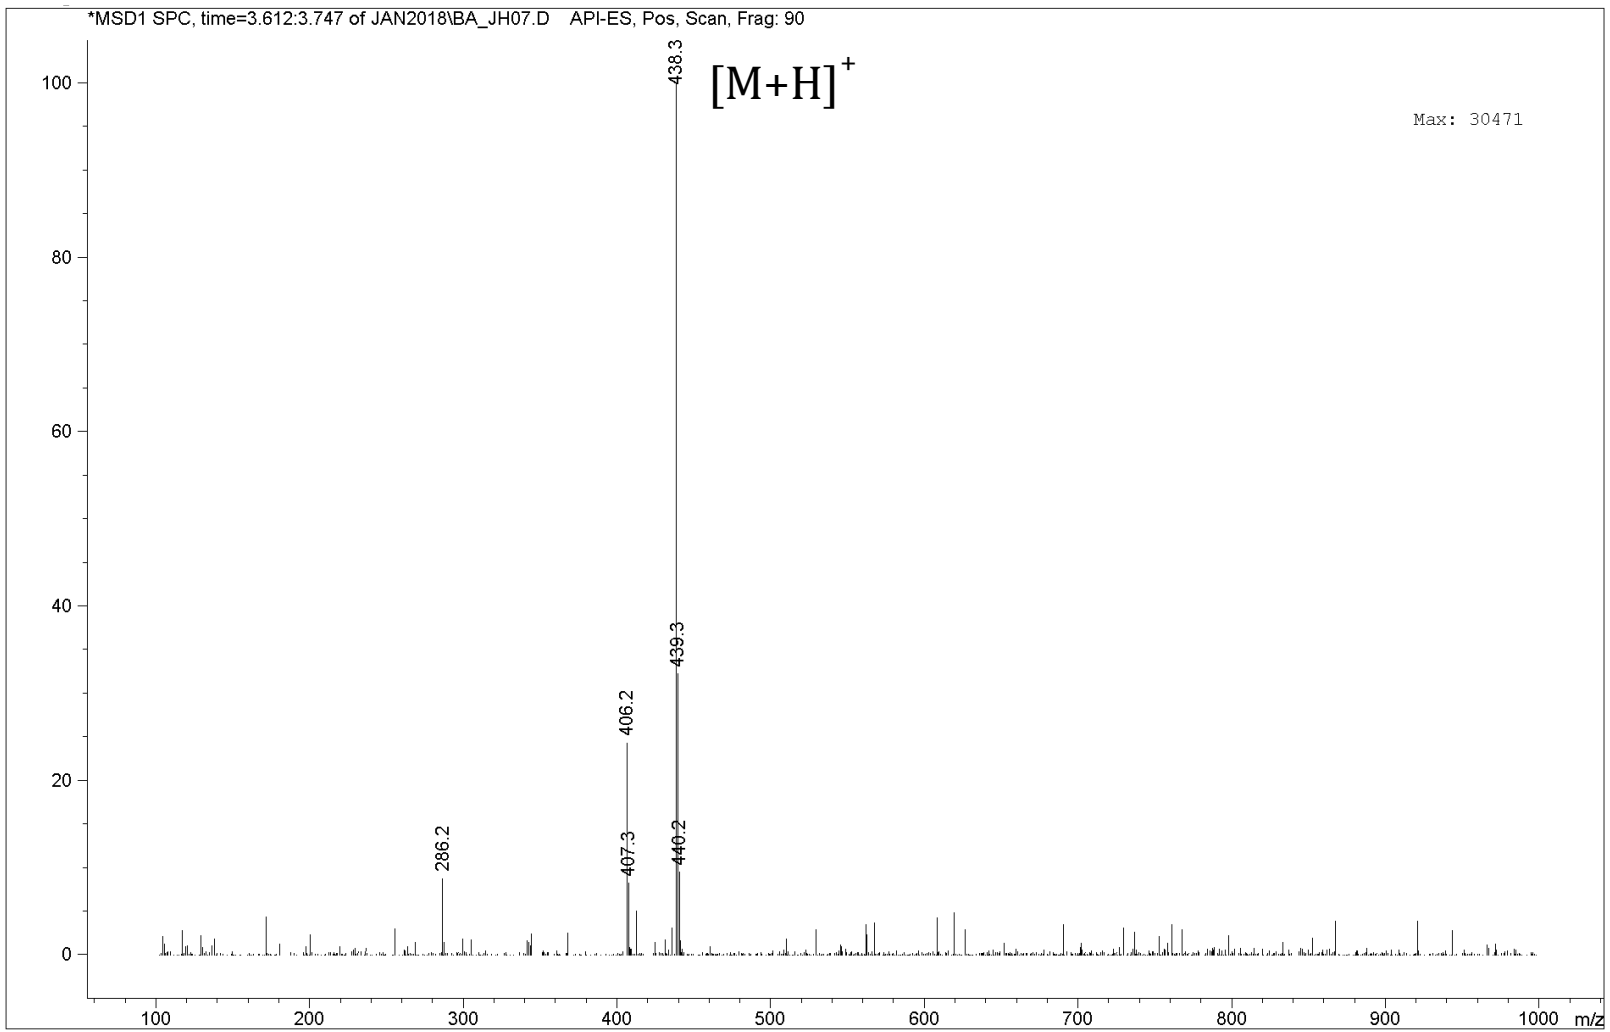

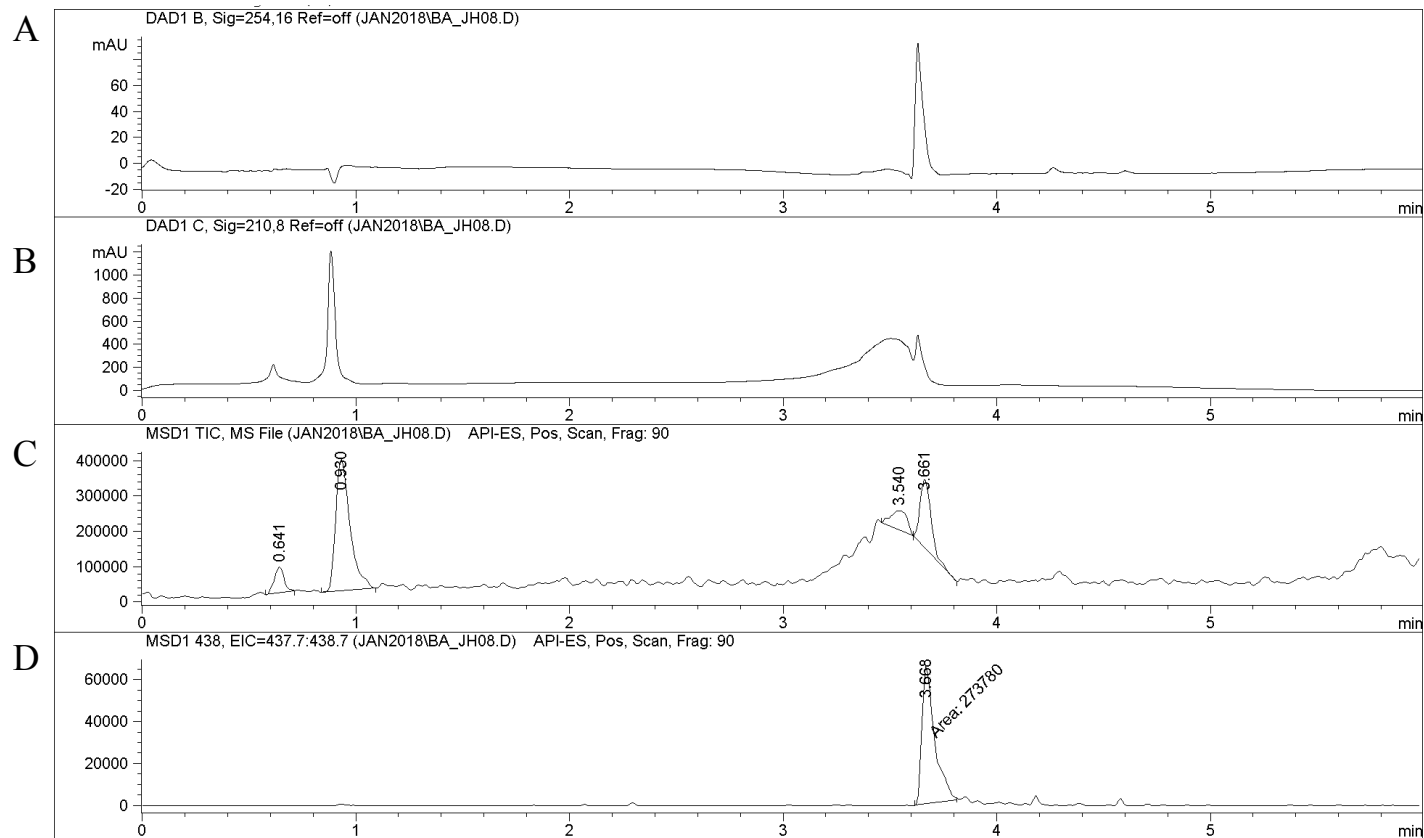

Figure S37:  
*B. Pahangi*  
**Compound 6m**  
 2.75 mg/mL [protein]  
 8 worms per sample

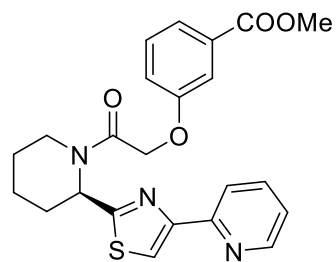

Chemical Formula:  $C_{23}H_{23}N_3O_4S$

Exact Mass: 437.14



\*MSD1 SPC, time=3.639:3.747 of JAN2018\BA\_JH08.D API-ES, Pos, Scan, Frag: 90

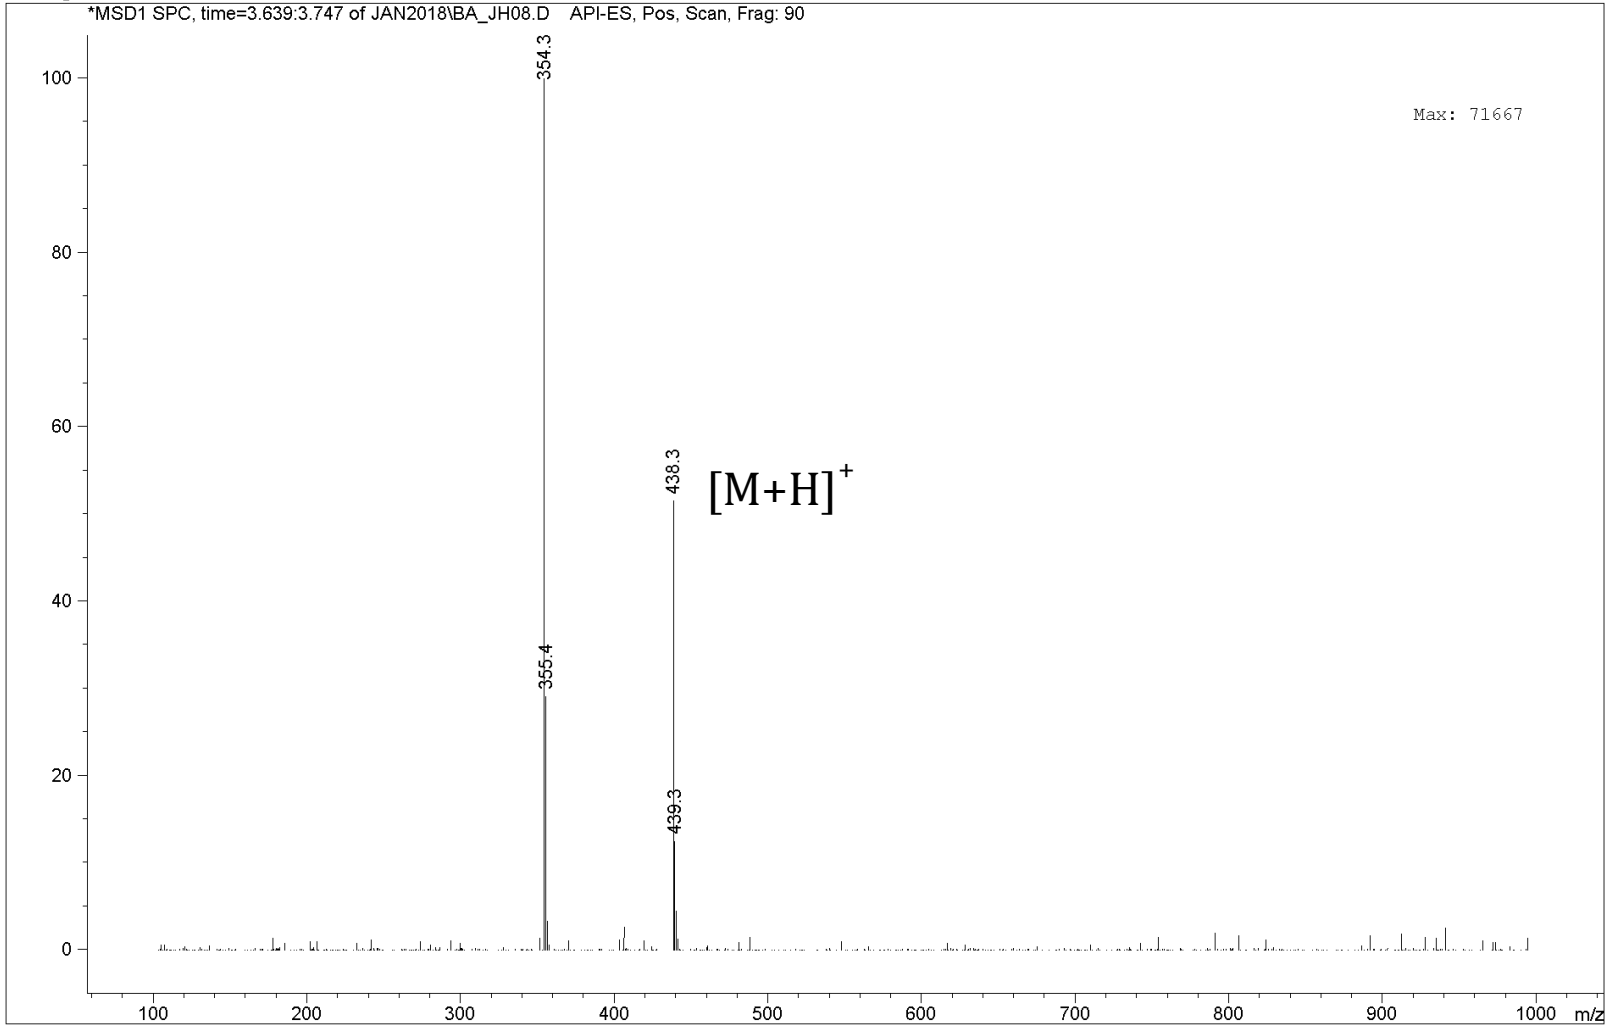

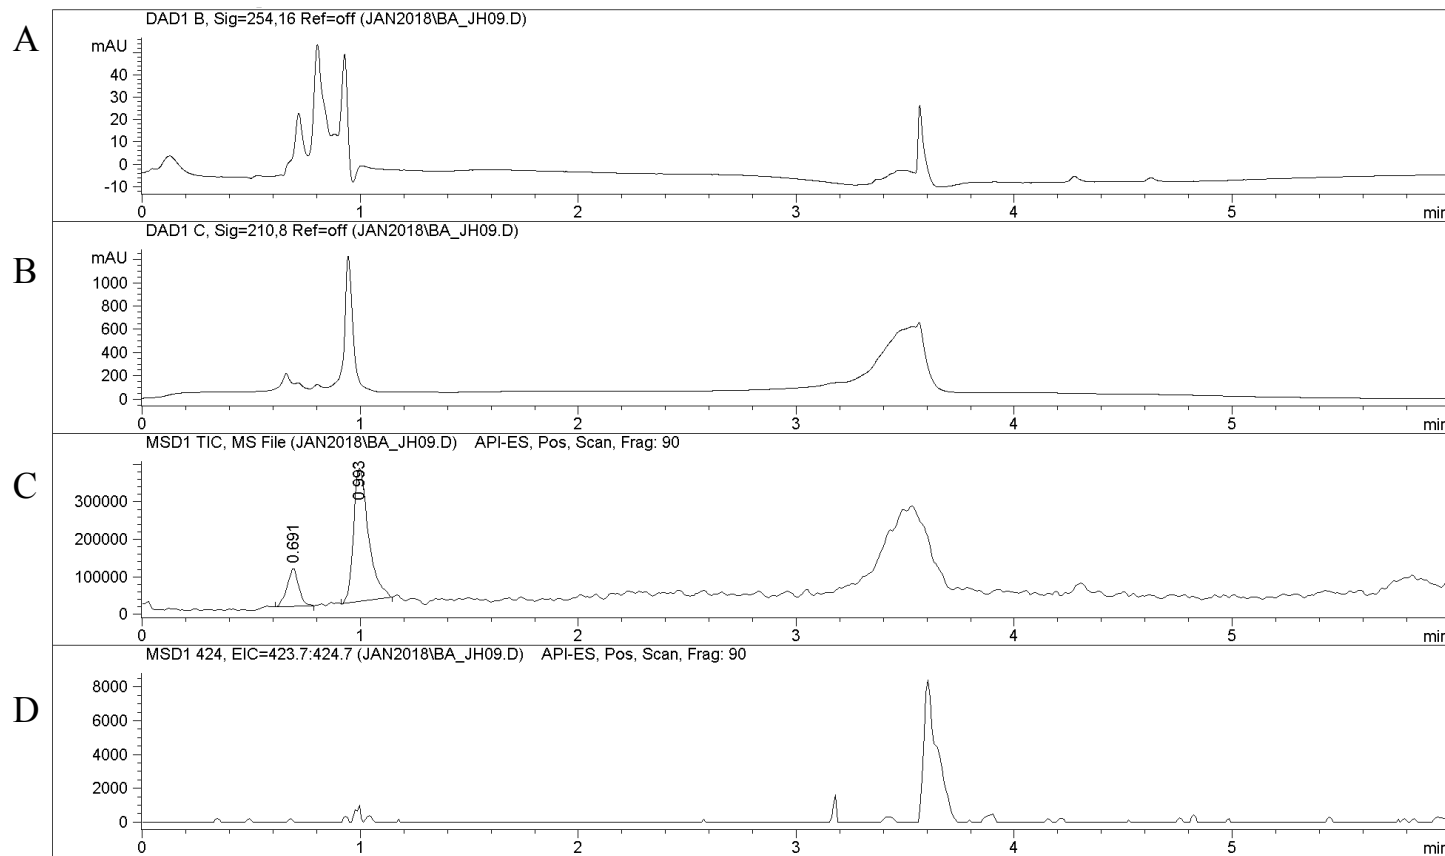

Figure S38:  
*B. Pahangi*  
**Compound 6n**  
 5.47 mg/mL [protein]

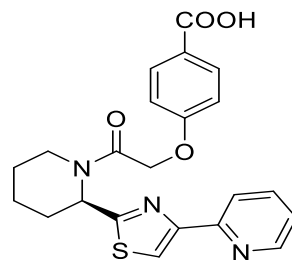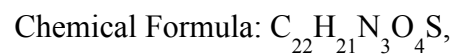

Exact Mass: 423.13

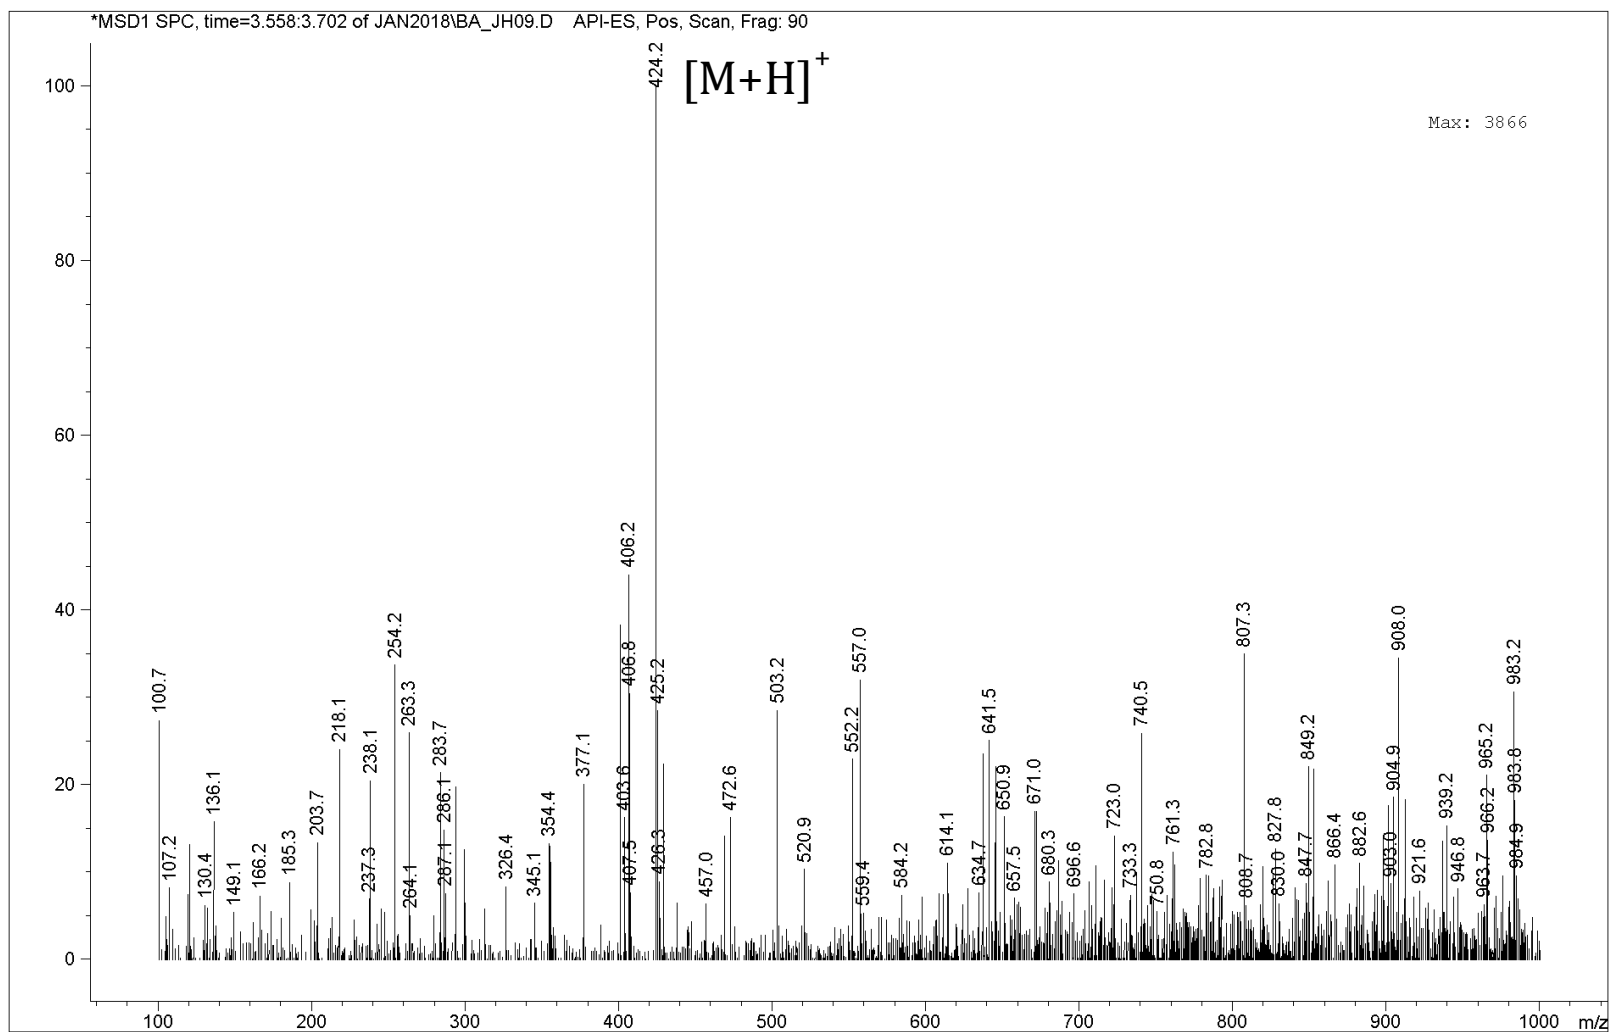

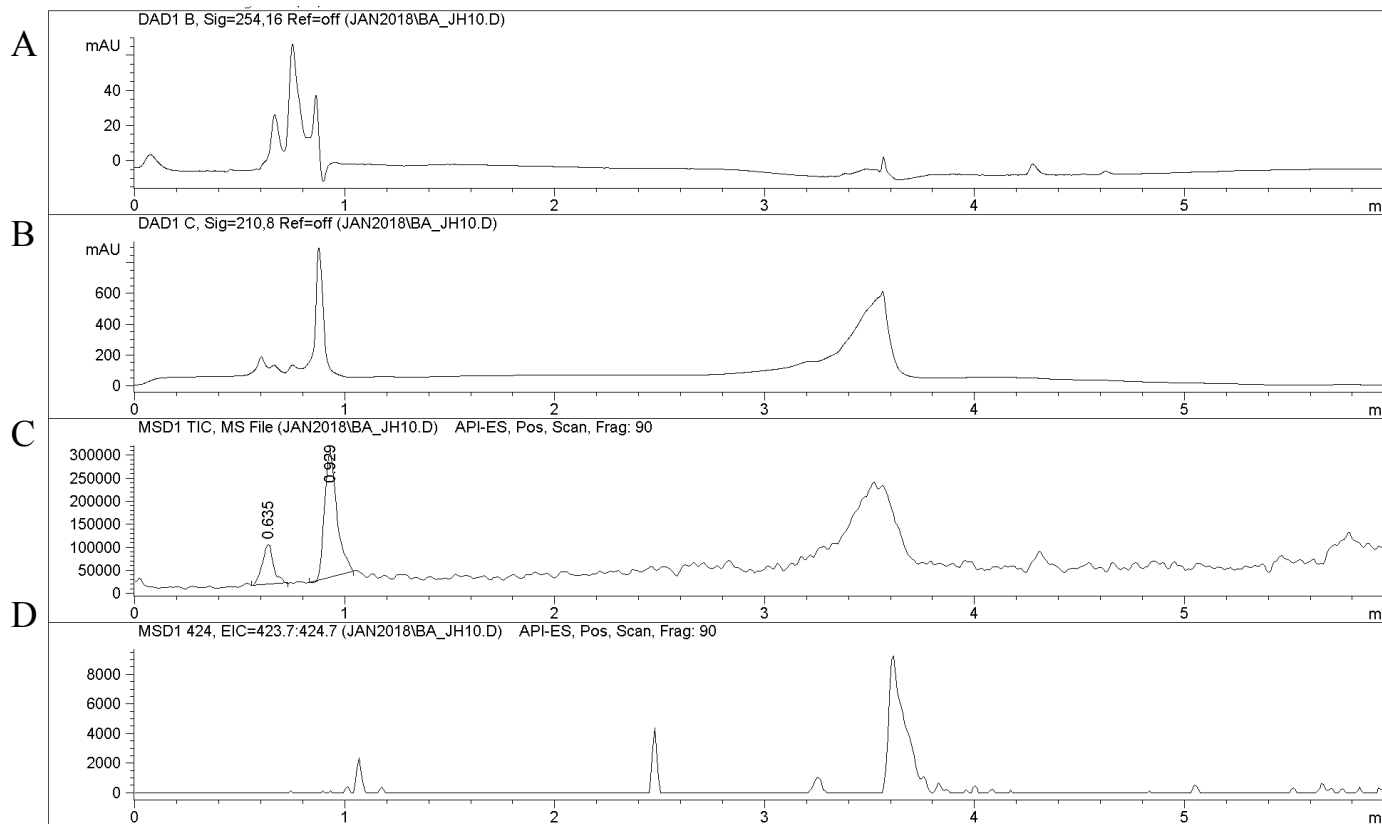

Figure S39:  
*B. Pahangi*  
**Compound 60**  
 3.33 mg/mL [protein]

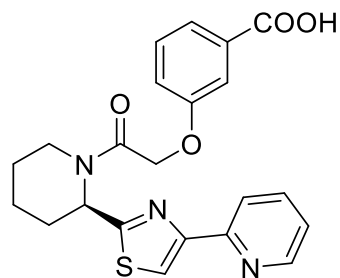

Chemical Formula:  $C_{22}H_{21}N_3O_4S$   
 Exact Mass: 423.13  
 S48

\*MSD1 SPC, time=3.585:3.720 of JAN2018\BA\_JH10.D API-ES, Pos, Scan, Frag: 90

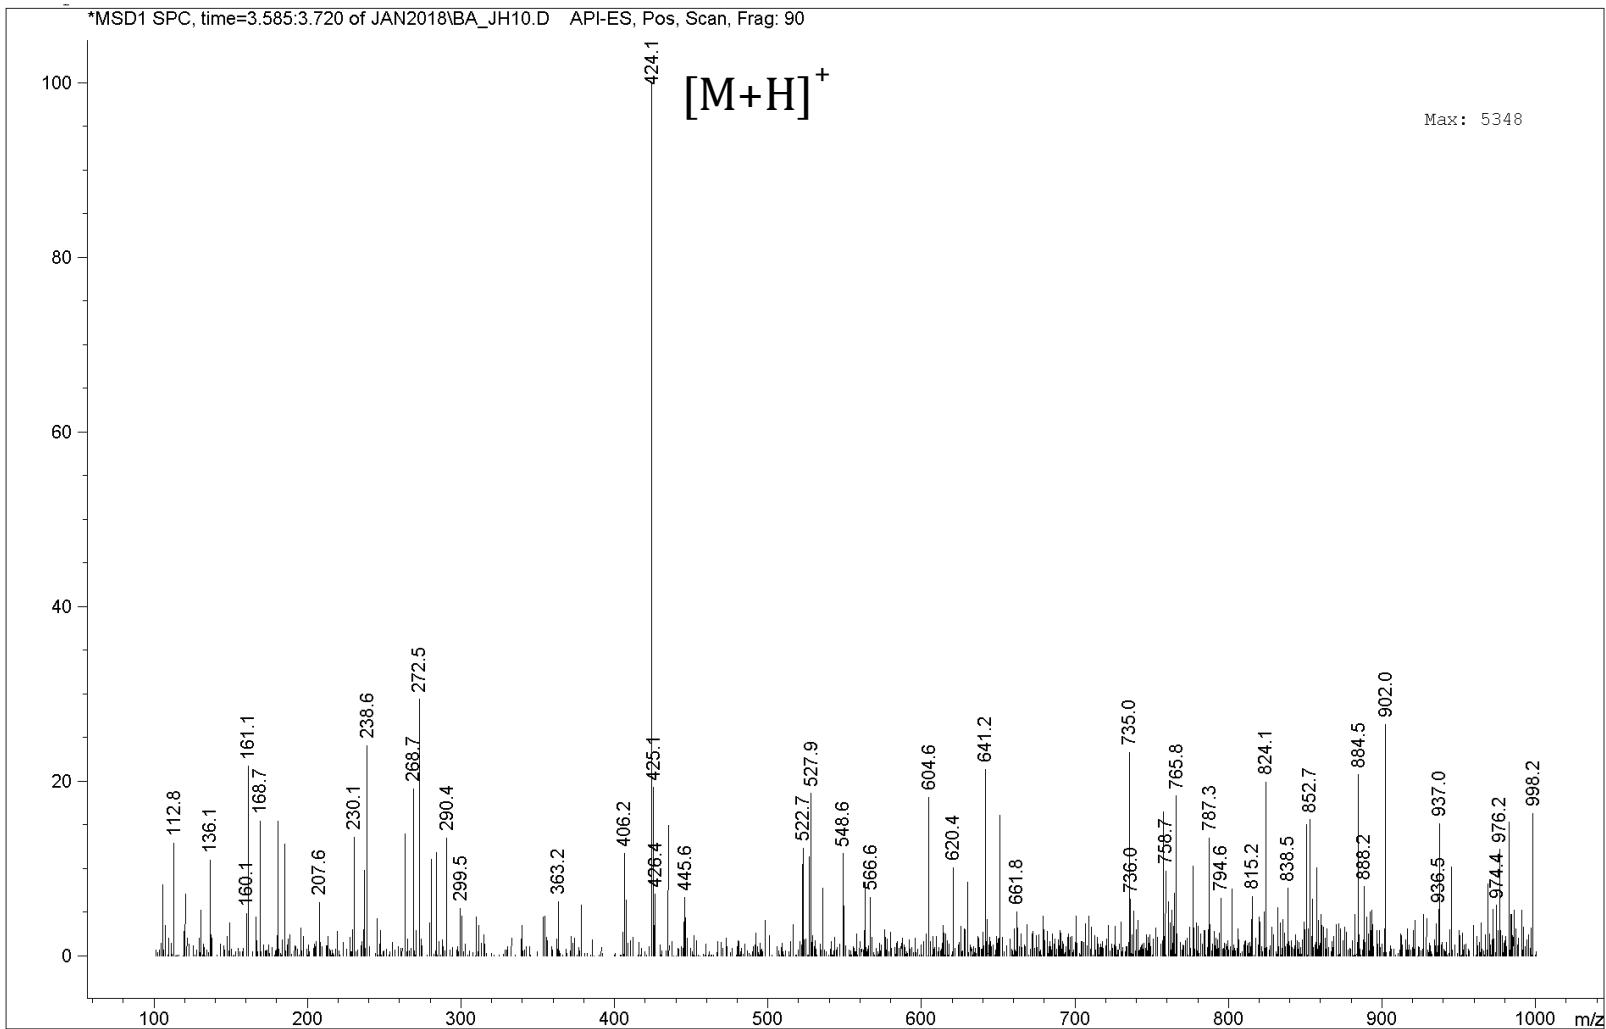

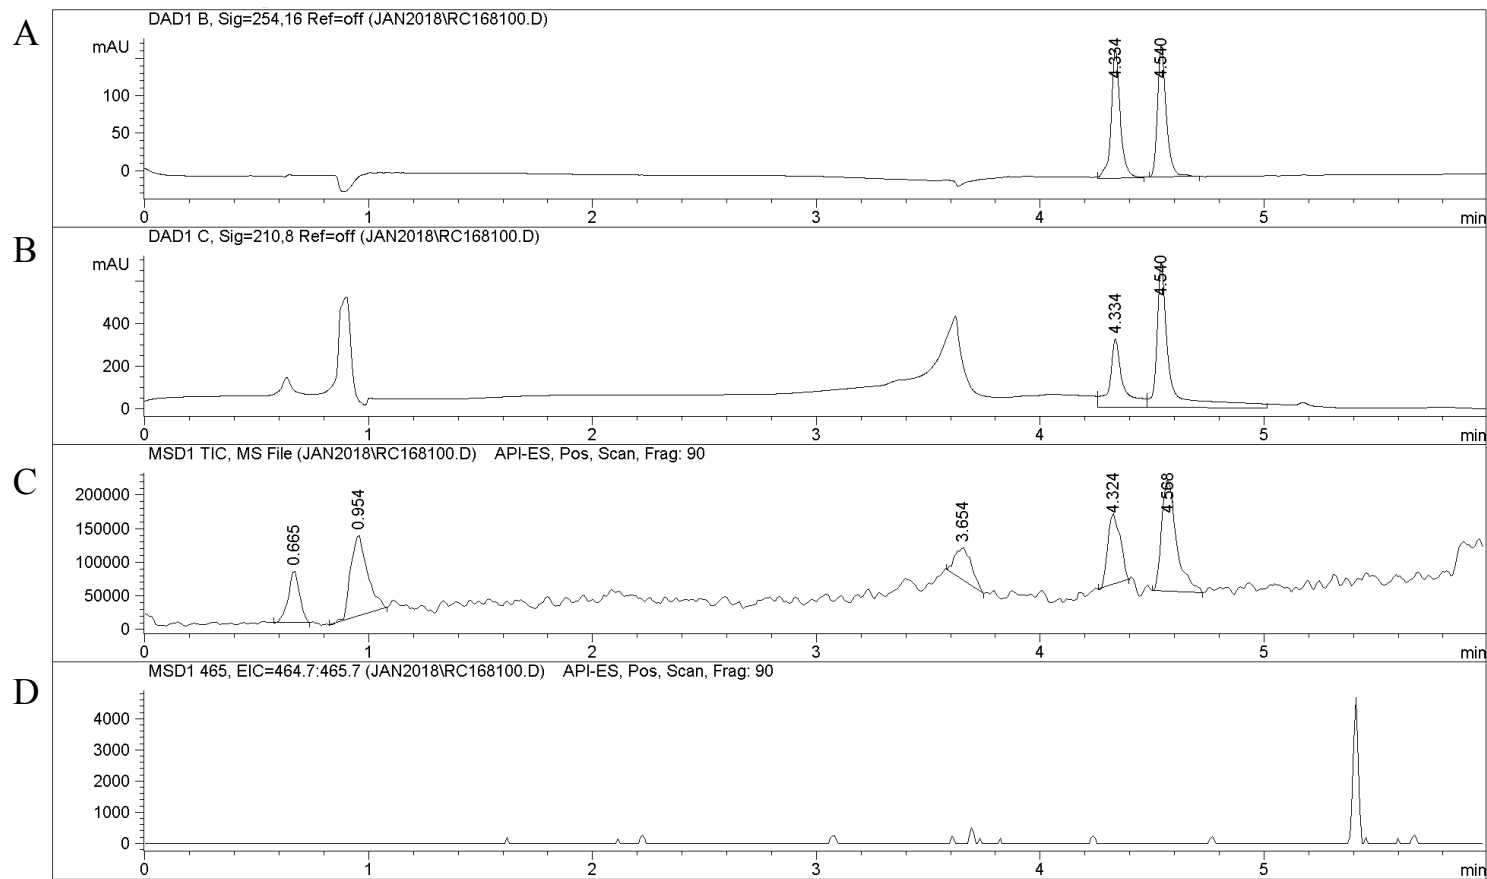

Figure S40:  
*B. Pahangi*  
**Compound 10a**  
 1.16 mg/mL [protein]

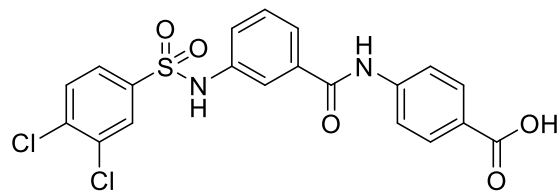

Chemical Formula: C<sub>20</sub>H<sub>14</sub>Cl<sub>2</sub>N<sub>2</sub>O<sub>5</sub>S

Exact Mass: 464.00

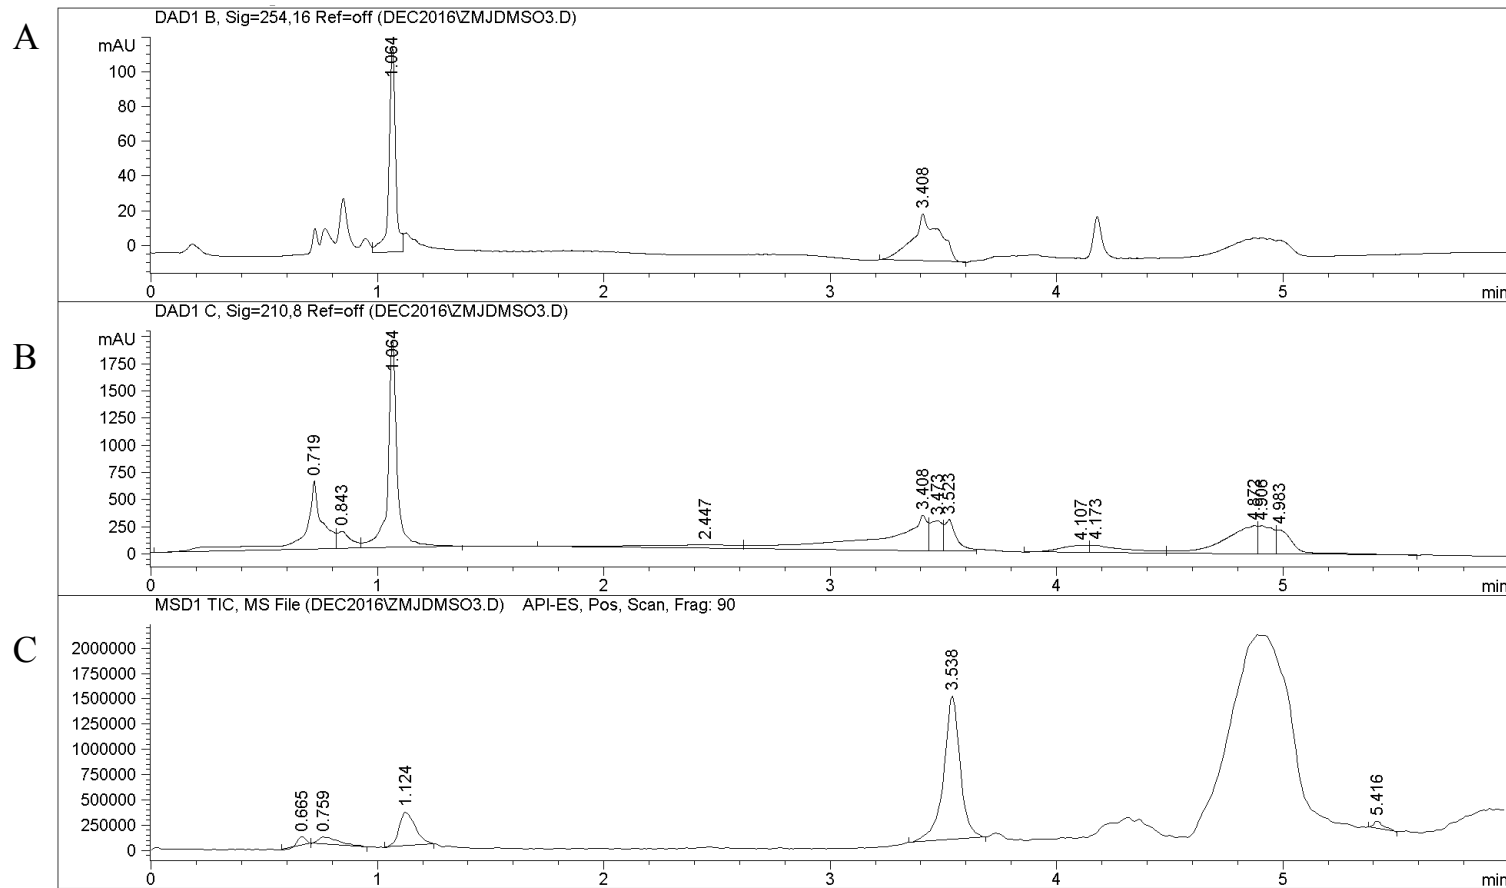

Figure S41:  
*T. muris*  
**DMSO**  
 10.1 mg/mL [protein]

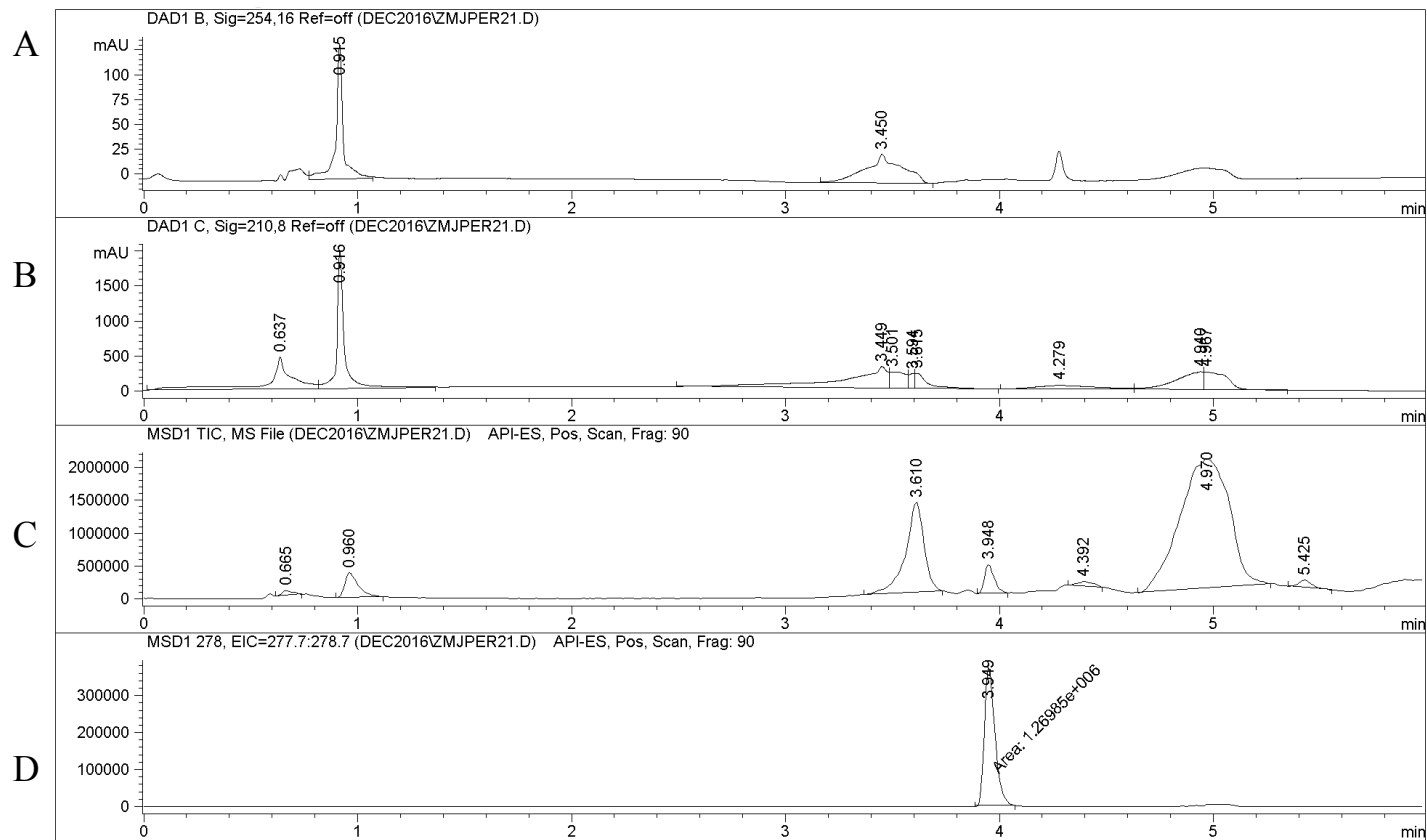

Figure S42:  
*T. muris*  
**Compound P1**  
 10.25 mg/mL [protein]

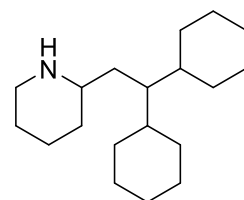

Chemical Formula: C<sub>19</sub>H<sub>35</sub>N  
 Exact Mass: 277.28



\*MSD1 SPC, time=3.910:4.018 of DEC2016\ZMJPER21.D API-ES, Pos, Scan, Frag: 90

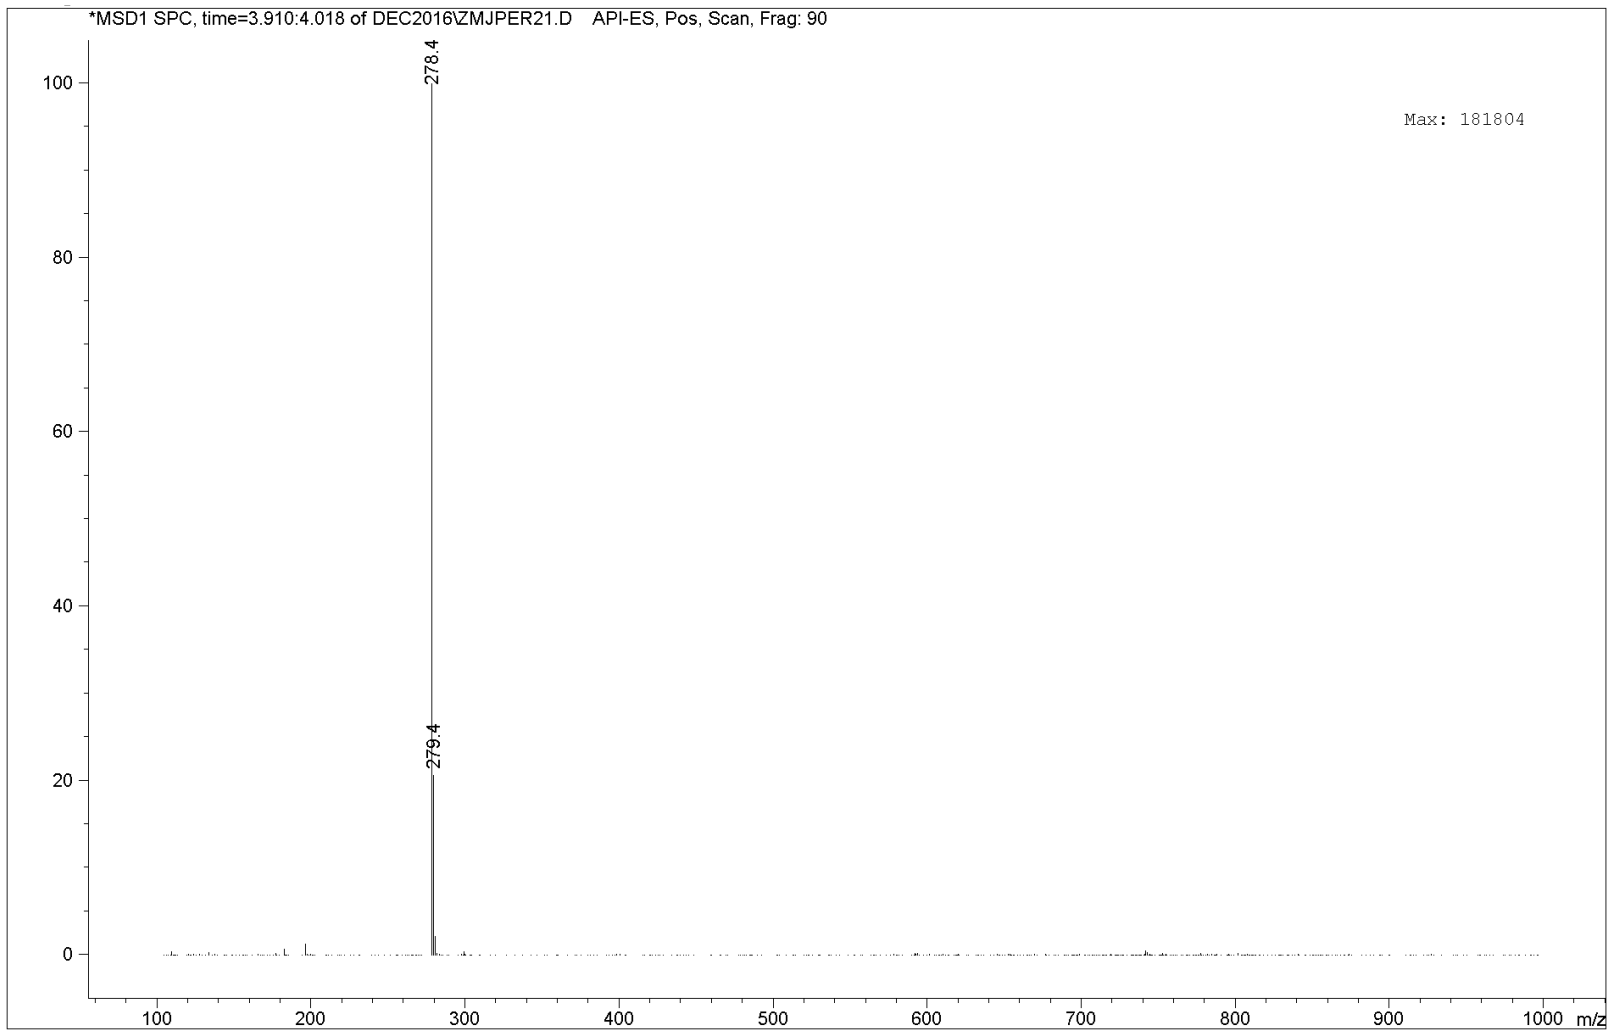

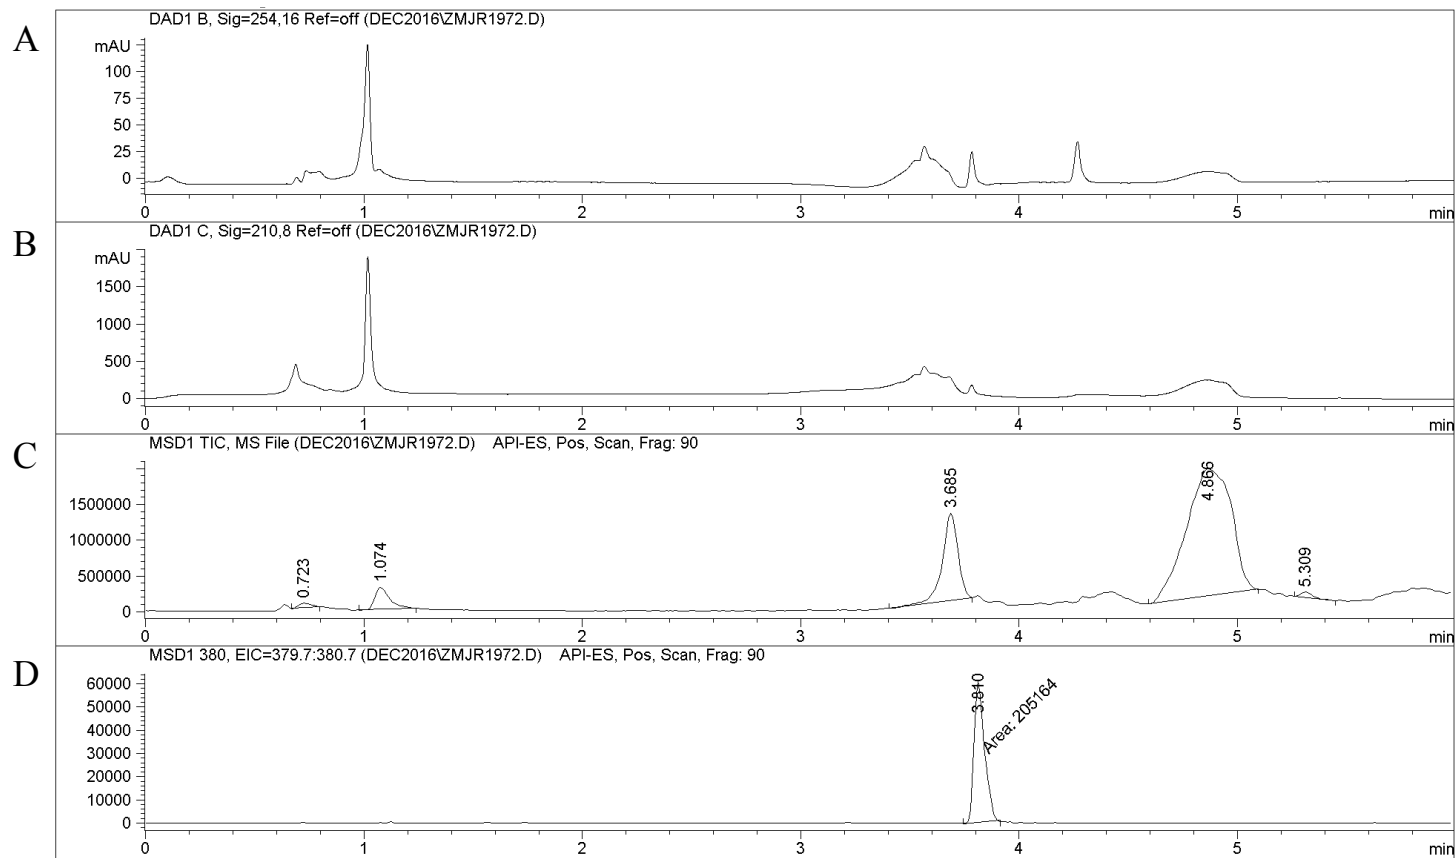

Figure S43:  
*T. muris*  
**Compound 6a**  
 11.85 mg/mL [protein]

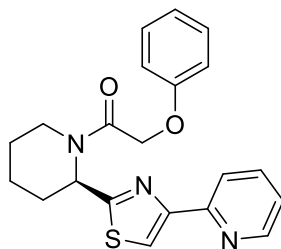

Chemical Formula: C<sub>21</sub>H<sub>21</sub>N<sub>3</sub>O<sub>2</sub>S

Exact Mass: 379.14

S54

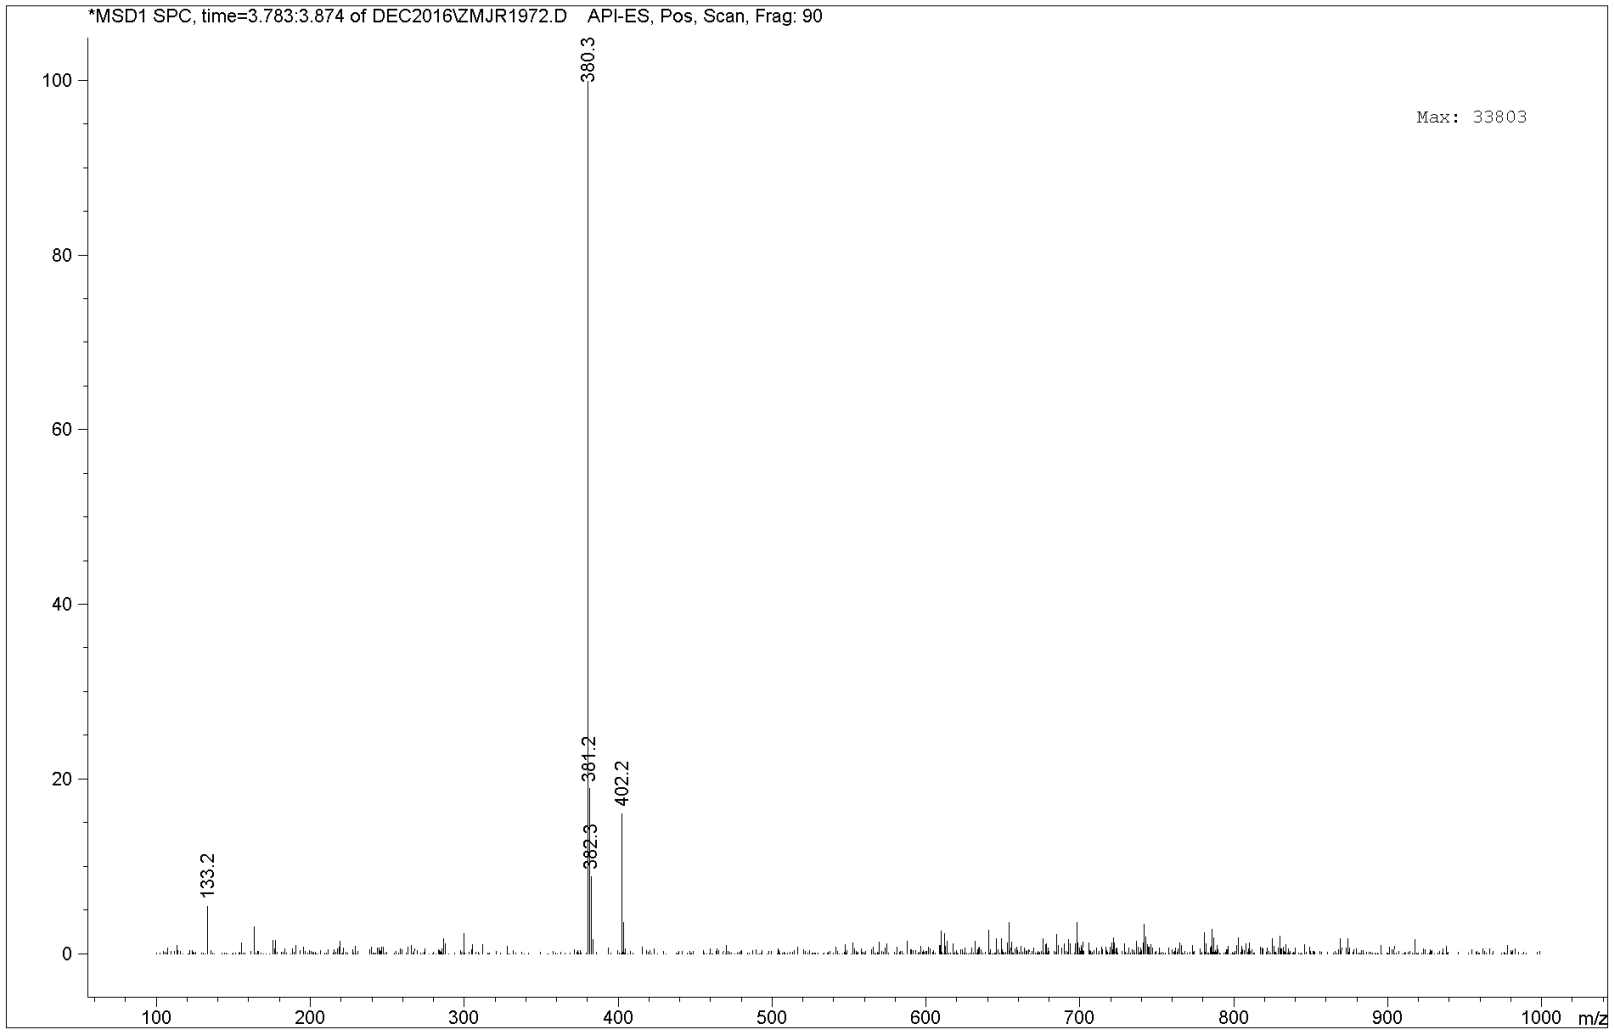

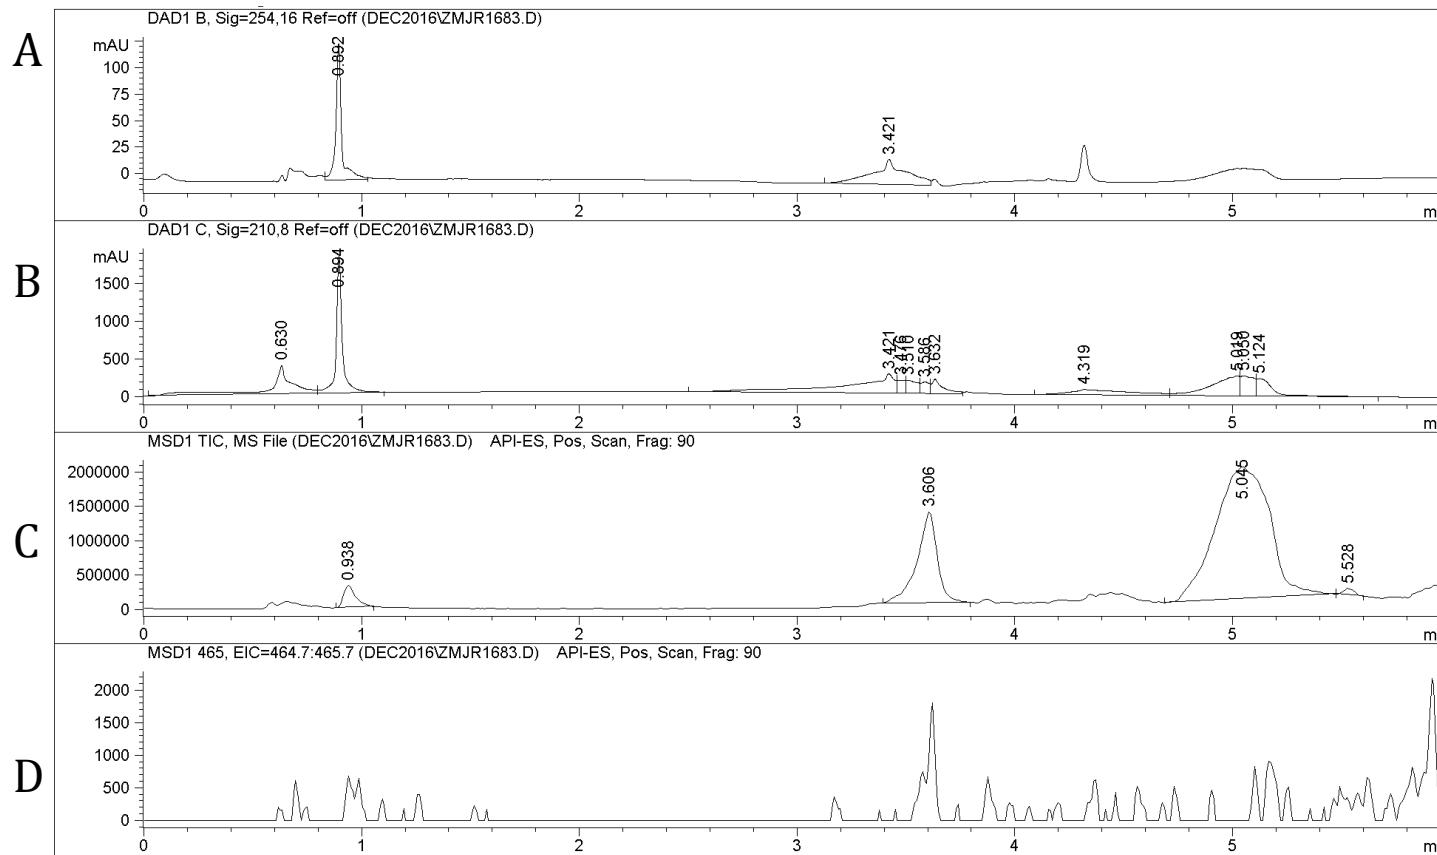

Figure S44:  
*T. muris*  
**Compound 10a**  
 8.58 mg/mL [protein]

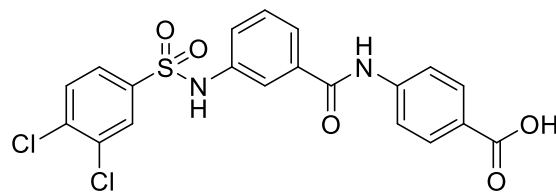

Chemical Formula: C<sub>20</sub>H<sub>14</sub>Cl<sub>2</sub>N<sub>2</sub>O<sub>5</sub>S

Exact Mass: 464.00

S56

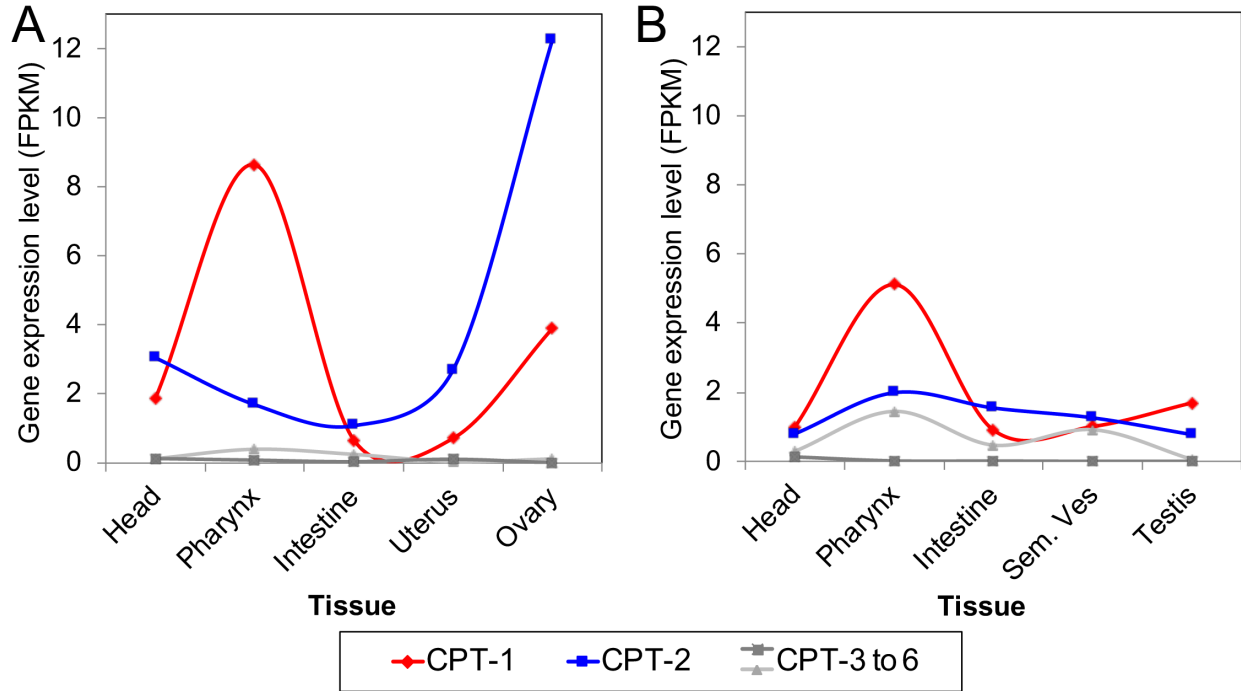

Figure S45. RNAseq based gene expression profile in different tissues of adult intestinal nematode *Ascaris suum* shows increased expression of CPT1/2 in ovary compared to the uterus in female worms and the seminal vesicle and testis in male worms. Gene expression values used are from our earlier report, Rosa et al, 2014.(Rosa, Jasmer et al. 2014).

Rosa, B. A., et al. (2014). "Genome-wide tissue-specific gene expression, co-expression and regulation of co-expressed genes in adult nematode *Ascaris suum*." *PLoS Negl Trop Dis* **8**(2): e2678.
